# Supplementary material for: Notch and TLR signaling coordinate monocyte cell fate and inflammation
Source: eLife. 2020 Jul 29;9:e57007. doi: 10.7554/eLife.57007 (PMC7413669; doi:10.7554/eLife.57007)
Supplement: Figure 4—source data 1. [file elife-57007-fig4-data1.xlsx]

## Sheet: 6groups Hi vs Lo +-A
gene_id	gene_name	Difference		WT Hi ctrl	WT Hi ctrl	WT Hi ctrl	WT Hi ctrl	KO Hi ctrl	KO Hi ctrl	KO Hi ctrl	KO Hi ctrl	WT Hi A	WT Hi A	WT Hi A	WT Hi A	KO Hi A	KO Hi A	KO Hi A	KO Hi A	WT Lo A	WT Lo A	WT Lo A	WT Lo A	KO Lo A	KO Lo A	KO Lo A	KO Lo A
ENSMUSG00000055322.15	Tns1	N/A		2.19266	2.54554	0.934098	1.32838	1.54554	1.74836	1.44867	1.29667	-0.481941	-0.597419	0.126743	-1.38783	-0.860453	-1.01246	-0.873257	-2.61022	-1.37503	-1.01246	0.328377	-4.05768	-0.0949183	-2.59742	2.49132	0.97474
ENSMUSG00000008193.13	Spib	N/A		0.719821	1.43031	-0.580819	-1.58082	0.430314	0.430314	0.556685	-2.90275	-1.73961	-2.60211	-0.443315	-1.31778	-2.60211	-0.739611	-0.902747	0.489571	0.067744	0.582317	1.93014	-0.902747	1.90425	2.11837	3.67468	1.9799
ENSMUSG00000031016.9	Wee1	N/A		-1.37995	0.0606246	-0.616695	-2.10212	0.0606246	0.620052	-0.102122	-1.42405	-1.37995	-0.60234	0.0995121	0.383305	1.54062	1.36729	-0.336587	-0.254125	-2.60234	-2.60234	0.933502	-0.0317321	2.85709	2.06062	1.74588	1.70523
ENSMUSG00000071343.2	RP23-388A14.1	N/A		-1.20096	-0.920852	-0.612075	-0.612075	-0.0541186	-0.307875	-0.612075	-0.612075	0.277088	0.0791483	0.250421	0.250421	0.546274	0.0360794	1.25042	0.250421	0.384003	0.41795	-0.612075	0.835384	0.0791483	0.664111	-0.612075	0.835384
ENSMUSG00000085129.1	RP23-183N8.3	N/A		-2.23443	-2.49746	0.265755	-1.07528	-0.295828	-0.649465	-0.281734	-3.98217	0.572927	0.704172	1.06222	0.50968	0.935497	-0.0120354	0.799187	1.24665	0.704172	0.350535	-0.89471	-0.338317	1.65634	0.765572	1.83801	0.850717
ENSMUSG00000069267.2	Hist1h3b	N/A		-2.6403	-1.19284	-0.468326	-0.468326	-1.77781	-2.6403	-0.468326	-0.468326	2.8369	3.24456	-0.468326	0.979133	1.47012	2.35148	0.394171	0.979133	0.222193	-2.6403	-0.468326	-0.468326	0.222193	0.544121	-0.468326	1.39417
ENSMUSG00000082560.1	RP23-440J5.8	N/A		-0.571005	0.428995	-1.25955	0.0623786	-1.37836	0.62164	0.0623786	0.199882	1.47962	0.206603	-1.67459	0.547806	-1.37836	-3.24086	-1.25955	-1.25955	1.2655	1.83109	1.38431	2.67119	0.943568	-0.208435	-1.25955	1.78484
ENSMUSG00000069682.6	RP23-460F17.1	N/A		0.680379	-0.734659	-0.687665	0.48226	0.680379	-0.319621	-0.0355883	-0.247092	0.487734	0.0023067	0.411871	0.880019	0.850304	1.13981	0.459176	0.752908	0.0023067	-1.31962	-0.325095	-1.1027	-0.734659	-0.734659	-0.137468	-0.450626
ENSMUSG00000114409.1	RP24-511E21.4	N/A		2.22551	1.75421	2.17697	1.06734	1.29478	-0.535297	0.463272	0.211733	0.75421	-0.383294	0.989341	-1.37323	0.87974	0.616706	0.404378	-1.01066	-2.12026	-0.383294	-0.595622	-1.37323	-0.535297	-3.56772	-0.480145	-0.480145
ENSMUSG00000113917.1	RP23-436E24.2	N/A		-0.107114	-0.714797	-0.222332	-0.84382	-0.152918	-1.52215	0.45574	-4.40676	-0.0627203	0.0628109	1.0407	0.099596	-0.152918	-0.522152	-1.54426	-1.37434	1.5076	1.57939	2.11395	2.18366	0.0221686	0.0628109	0.813292	1.68456
ENSMUSG00000042770.8	Hebp1	N/A		-0.104082	-0.551541	-3.0905	0.356964	-1.20362	-1.20362	0.0939293	0.678892	1.15895	1.41529	1.29556	1.772	1.91976	1.07649	1.09393	1.67889	-0.551541	-0.104082	-1.228	-3.0905	-1.01097	-0.841048	0.859464	-0.420644
ENSMUSG00000000982.5	Ccl3	N/A		-1.73863	0.168263	-1.35268	-0.0531173	-3.60112	0.431298	-1.05312	-0.731189	0.431298	-0.568702	-0.965654	-1.14623	-1.15366	-0.416699	-0.593686	0.728242	2.68764	2.56515	0.531845	1.45468	0.348835	0.846335	1.61931	1.56159
ENSMUSG00000089213.1	Gm23388	N/A		-1.04061	-0.204111	-0.46274	0.122222	1.61146	1.95939	0.122222	1.12222	3.4328	-1.14753	0.652737	0.652737	0.399961	0.281316	0.952297	0.859188	-1.52604	-1.14753	-1.46274	-0.46274	-1.67804	-0.941076	-1.0477	-1.0477
ENSMUSG00000007080.14	Pole	N/A		-1.87352	-0.495007	-2.70302	-0.840525	-1.61048	-0.288556	-2.70302	-1.84052	1.26399	1.58591	1.91436	1.91436	0.559441	0.44841	0.96683	0.3294	0.848948	0.196871	-2.70302	0.744438	-1.19545	0.559441	2.55179	2.36893
ENSMUSG00000004562.16	Arhgef40	N/A		-0.52674	1.05822	1.54967	0.932997	-1.52674	-0.204812	-2.83639	-2.83639	-0.52674	-0.52674	0.348035	0.611069	0.0582223	-2.38924	-1.38893	-1.97389	0.643185	0.280615	2.933	-2.83639	1.86558	1.79519	3.11357	2.38366
ENSMUSG00000028399.18	Ptprd	N/A		2.23601	0.768888	0.350661	2.53969	1.07374	4.02127	2.48816	2.52698	1.00335	-3.18107	-1.2932	-0.386305	-0.996647	1.26639	0.0991225	0.794268	-0.51122	-3.18107	-1.48584	0.230367	-3.18107	0.681425	-1.70823	-4.15569
ENSMUSG00000089669.7	Tnfsf13	N/A		0.759228	0.451107	0.129241	0.654702	0.058789	0.813677	0.0960736	0.234594	-0.356248	-0.481779	0.193371	0.274671	0.380717	0.380717	0.351633	0.284519	-1.13386	-1.61928	-0.488889	-0.785871	-0.356248	1.10318	-0.0949745	-0.849064
ENSMUSG00000091449.2	Gm10269	N/A		-0.311859	-0.633787	-0.0211329	-0.378685	0.173568	0.173568	0.321754	0.428669	-0.0488243	0.173568	-0.855123	-0.0211329	0.951176	0.536138	0.643683	0.888102	0.173568	0.173568	-0.855123	0.175904	-1.04882	-0.311859	0.144877	-0.471794
ENSMUSG00000084104.1	RP23-308K19.1	N/A		-1.25853	-0.39603	-0.584251	-3.39161	-1.25853	-1.25853	0.56259	-1.58425	0.60397	-0.39603	-0.806643	-0.391606	-0.39603	1.18893	0.778319	0.131956	0.188932	1.60397	1.2231	1.33631	0.188932	1.18893	1.38975	1.33631
ENSMUSG00000097887.2	RP23-319B15.9	N/A		0.354623	-1.9673	-2.61127	-2.61127	0.20262	-1.9673	0.0585821	-2.61127	0.20262	-0.645377	1.15812	-0.426845	0.939586	-0.15995	0.573155	-0.748773	0.354623	0.20262	1.89508	-0.16381	1.28062	1.20262	2.95167	2.53663
ENSMUSG00000091971.3	Hspa1a	N/A		2.03338	3.32026	-0.33281	-0.69538	2.4119	1.47699	1.60997	1.65915	-3.02551	-3.02551	0.38479	-1.06978	0.0333838	-0.803117	0.804694	-0.124224	-3.02551	-0.910033	-1.18081	-1.7372	-0.0255098	1.53928	0.698899	-0.0173087
ENSMUSG00000018986.10	Slfn3	N/A		1.5847	1.2993	1.95961	1.21639	1.42858	1.46923	1.57547	1.30754	-0.115737	-0.000259876	0.393265	-0.137249	0.2993	-0.7007	-0.985247	0.599716	-0.000259876	-1.7007	-2.30717	-1.13725	-3.5632	-0.000259876	0.822108	-3.30717
ENSMUSG00000029314.14	Agpat9	N/A		0.298622	0.298622	-2.8112	0.221226	-1.43834	0.883585	-2.8112	-0.948699	1.93089	1.14662	1.37323	2.44362	0.976694	2.02109	2.0513	2.88419	-1.02331	-2.8858	-1.36374	-0.948699	-2.8858	0.677134	0.0513012	-0.141344
ENSMUSG00000006398.15	Cdc20	N/A		-0.925414	-1.18845	-2.60664	0.715291	-0.0509446	-1.51038	0.0632141	0.715291	2.37227	2.3476	1.64818	2.30025	0.881942	1.19006	0.255859	1.34332	-1.92541	-0.340451	-2.60664	0.715291	-0.510376	-0.340451	-2.60664	0.0632141
ENSMUSG00000070348.5	Ccnd1	N/A		0.819784	1.16374	-3.08544	1.43812	0.511662	1.20681	-0.278082	0.499525	-2.29569	-1.55873	-0.6704	-2.34847	-3.74315	-0.71073	-0.210968	-3.6704	0.511662	1.02624	1.88419	0.187581	0.9267	2.14171	3.88035	2.37399
ENSMUSG00000090394.8	RP23-71J17.1	N/A		2.1444	1.83002	0.384105	0.552787	1.85489	4.34428	-0.417668	1.20893	-0.430511	0.508088	0.570095	0.42816	-0.157493	-0.108583	0.582332	0.741385	-0.845549	-2.69355	-1.01979	-1.88566	-4.01547	-2.43051	-0.534365	-0.610313
ENSMUSG00000066170.6	RP23-23B10.4	N/A		-1.25089	-0.710325	-4.14186	-1.47201	-0.90297	-0.318007	-1.95744	-1.47201	-1.00989	0.933531	1.00604	2.37885	1.17232	0.377138	0.765029	0.849918	0.418958	0.0445623	0.849918	1.57862	1.31204	-0.0664692	0.849918	0.765029
ENSMUSG00000025163.6	Cd7	N/A		-0.160275	1.17853	-1.71474	-0.607828	1.03766	1.17853	0.0110822	-0.205729	-0.92581	-1.92581	0.339705	-1.71474	-3.24774	-1.44038	-0.508292	-2.41518	0.610243	0.961715	2.22144	-1.32772	1.33722	1.39612	3.81364	2.10838
ENSMUSG00000046152.16	Fut10	N/A		2.55418	-0.223428	3.248	2.99216	1.13914	2.46107	0.626509	1.44963	-2.03078	0.669657	-2.93643	-0.0739307	-0.44582	1.13914	1.73342	1.174	-2.89328	-0.0307827	-2.93643	-2.93643	-2.89328	0.55418	-0.266576	-2.07393
ENSMUSG00000051435.11	Fhad1	N/A		-1.00261	0.582348	-2.85912	-0.411659	-2.00261	-0.00261474	-1.99662	0.00337863	-1.41765	-2.00261	1.32531	-2.85912	0.16731	-2.00261	-0.189266	0.00337863	1.99739	1.75227	1.25131	1.09084	2.12667	1.80474	2.7313	1.91027
ENSMUSG00000030117.5	Gdf3	N/A		1.65224	0.372136	1.83742	0.252454	2.63087	1.77423	-0.595544	1.75495	-1.43522	-3.29771	-0.45804	-1.33251	-1.43522	0.734707	0.54196	-1.11012	-0.850256	-1.43522	-1.91747	-0.595544	0.265221	1.02421	1.29198	0.330456
ENSMUSG00000032496.7	Ltf	N/A		-1.43944	-1.43944	-1.97787	-1.97787	-1.43944	-1.43944	-1.97787	-1.97787	0.00801563	-0.576947	0.69198	-0.115375	-0.576947	0.744981	-0.530412	0.884625	2.81537	-1.43944	3.61255	-0.530412	1.23041	3.55234	3.01391	0.884625
ENSMUSG00000100629.1	RP23-378G22.3	N/A		-0.644145	0.493359	-0.533405	-1.14751	-0.850596	0.734367	-0.552771	-2.06178	-0.0916038	-0.303108	-0.0757236	-0.207635	0.149404	-1.96607	-1.30279	-1.40467	1.30695	0.403161	2.35152	2.11429	0.734367	0.033927	1.22077	1.59972
ENSMUSG00000046080.17	Clec9a	N/A		2.00859	2.83747	0.859989	2.08238	1.40451	2.58084	-0.0811172	1.54181	-0.151879	-0.151879	1.00295	-3.72497	-3.23934	-4.10184	-1.26554	-1.72497	-0.538903	-0.779911	0.701292	-2.14001	0.28422	-0.151879	2.26371	0.48448
ENSMUSG00000051124.6	Gimap9	N/A		-1.27911	-0.694151	-2.8594	-0.674972	-1.27911	0.0428143	-0.411938	-2.8594	-1.54215	-0.694151	0.703539	0.173025	-0.694151	0.720886	0.90999	1.0031	0.659486	1.09012	0.703539	1.25103	1.38385	2.28567	0.810455	1.25103
ENSMUSG00000030165.16	Klrd1	N/A		-0.234122	1.67277	0.829693	-0.0183041	1.67277	0.350841	0.659768	1.36021	0.0878065	-0.649159	-3.20273	-1.34023	-1.23412	-2.09662	-1.0183	-1.75527	-0.234122	-2.09662	1.30362	-3.20273	1.67277	1.08781	3.63705	2.74723
ENSMUSG00000024940.10	Ltbp3	N/A		0.803226	1.68775	0.256966	1.16386	1.00968	1.91014	0.426891	0.881456	0.626349	0.803226	0.919931	0.195565	1.05698	0.746643	0.919931	0.426891	-1.89721	-1.89721	-0.868565	-4.19049	-1.08986	-3.75971	1.19557	-1.328
ENSMUSG00000069114.8	Zbtb10	N/A		-0.934105	0.32893	-1.76191	0.560014	-1.25603	1.32893	-0.176951	-0.346876	-2.25603	-3.11853	-0.539521	-0.176951	0.203399	-0.67107	-2.34688	-1.02495	1.78836	2.83143	2.11256	1.35356	1.55132	0.203399	0.740587	1.60732
ENSMUSG00000039783.15	Kmo	N/A		1.46994	1.79187	0.699443	1.11094	0.924117	1.7509	1.01191	1.0043	0.0355382	-0.00399017	-0.066092	-0.663128	-0.730972	0.0452533	-0.398074	-0.209218	-2.26702	-2.08645	0.216842	-4.75059	0.0159092	-0.945096	1.67087	0.372792
ENSMUSG00000022504.10	Ciita	N/A		1.45967	1.55806	0.642473	0.821354	1.66698	1.17242	1.19043	0.871268	-0.189961	-0.0737085	0.130209	-1.24523	-0.512731	-0.31641	-0.323788	-0.862124	-1.72534	-1.77492	-0.272073	-4.1488	-0.929171	-0.334883	2.09454	1.10174
ENSMUSG00000079641.3	Rpl39	N/A		-0.0511918	0.0394783	-0.549573	-0.00325108	-0.37312	0.383211	0.0500736	0.366879	0.0827627	0.371623	0.203537	0.512712	0.269176	0.478122	0.360021	0.511827	-0.392749	-0.278793	-0.573758	-0.350026	-0.582573	0.0540514	-0.0455542	-0.482878
ENSMUSG00000076281.1	Gm24270	N/A		-0.80425	-0.107893	-2.53597	-2.09924	0.42653	1.34392	4.62277	-1.26447	2.99889	-0.464765	4.82761	4.88953	3.16262	2.43091	4.94703	-1.37092	-2.41896	-1.99942	-2.23459	-2.8434	-3.78669	-0.780887	-3.58037	-3.35798
ENSMUSG00000093060.1	Mir5104	N/A		-0.0934341	0.491529	0.48515	-0.704674	0.228494	-1.09343	-0.278409	-1.06082	0.491529	-0.508472	0.177969	-1.61721	-1.09343	-1.09343	-0.534749	-0.617211	1.366	0.906566	1.83448	1.32875	0.906566	-0.508472	0.424609	0.562112
ENSMUSG00000020014.17	Cfap54	N/A		-1.43769	0.299279	-1.04182	-1.42033	0.147276	-2.02265	-2.1573	-3.74226	0.835331	0.884242	1.56152	1.93016	1.10663	0.147276	0.257738	0.164629	0.562313	0.67779	2.45741	1.36626	0.500913	-1.70072	-0.2187	0.8427
ENSMUSG00000073491.11	Ifi213	N/A		4.17163	3.03868	1.78593	1.80045	3.52002	4.11518	1.62389	2.12286	0.589924	-6.06699	1.16463	-1.34915	0.615687	0.482008	0.891451	-0.848533	-1.1601	-6.06699	-1.11308	-2.49522	-1.61953	-1.61953	-1.30702	-2.27621
ENSMUSG00000003779.15	Kif20a	N/A		-3.26756	-0.567116	-0.723901	0.0350909	-0.945627	-1.94563	0.620053	-2.42434	2.2243	1.9419	1.38301	1.16062	0.732445	1.99923	0.823587	0.861062	-0.567116	-0.09763	-1.42434	-0.51745	-0.09763	0.590425	-0.176413	0.383014
ENSMUSG00000033427.14	Upb1	N/A		2.15356	2.21885	1.03914	1.48812	1.87441	2.36446	0.944504	1.83005	0.20603	-0.79397	0.419413	-0.850677	-1.01636	-1.01636	0.347263	-0.545822	-1.79397	-3.60133	0.553714	-4.80064	-0.900885	0.305566	1.19114	-1.61621
ENSMUSG00000021573.15	Tppp	N/A		0.100363	0.998484	1.11056	1.02483	1.47382	0.926334	0.901972	-0.68299	-0.452178	0.728395	1.69552	0.364315	0.728395	1.10036	1.21747	0.695521	-2.03714	-4.22156	-0.502418	-4.45238	-0.658629	1.31336	-1.58988	0.217474
ENSMUSG00000053469.14	Tg	N/A		0.781759	-1.33372	0.964107	-0.357821	-0.218241	-0.0117903	-0.942783	-0.135428	1.47364	1.47364	2.05722	2.83858	0.888674	1.43887	1.14468	1.75766	0.0813191	-0.333718	-2.80528	-2.80528	-0.459249	-3.78118	-0.357821	-1.35782
ENSMUSG00000031239.5	Itm2a	N/A		-0.122277	-0.581709	-2.11151	0.558337	-0.774354	-0.259781	-1.24902	-2.11151	-1.58171	-1.25978	-0.664055	0.335945	-0.411784	-0.259781	0.920907	0.558337	0.810609	-0.411784	-2.11151	1.07291	3.0765	1.77584	2.65787	2.1433
ENSMUSG00000035936.6	Aldh5a1	N/A		0.112875	1.90642	0.845565	1.11858	1.29345	0.112875	-0.932042	0.348066	0.527912	0.453912	1.2606	1.01549	1.41544	0.598302	0.65292	1.11858	-0.209054	-2.79402	0.260603	-1.15443	-1.20905	-2.20905	-3.60189	-0.932042
ENSMUSG00000106867.1	RP23-400L4.7	N/A		-0.0304055	-0.942943	-0.307853	-1.53025	-1.22305	-2.22305	-0.0277448	-0.655776	0.802485	-0.708477	0.13272	0.469755	0.461448	-0.86048	-1.53025	-3.9777	1.68384	1.42903	2.86207	2.01408	0.969594	0.64202	0.884792	1.66615
ENSMUSG00000022150.16	Dab2	N/A		-1.42805	0.0194041	-1.65161	-1.65161	-1.42805	0.434442	-1.65161	-1.65161	-1.42805	-1.42805	-1.65161	0.795847	0.0194041	1.43444	-1.65161	-0.204154	0.0194041	-1.42805	2.73445	-1.65161	3.0783	2.13488	4.09353	4.14162
ENSMUSG00000073394.4	Runx2os1	N/A		-0.136159	-0.943514	0.0575876	-1.1648	0.226411	-2.80601	-1.74977	0.894089	1.05649	-0.943514	-0.0493276	-0.0493276	-1.35855	-0.358551	-1.74977	0.0575876	2.93913	2.88938	2.05759	2.10821	-0.621586	0.0564861	-0.749767	0.337696
ENSMUSG00000039713.16	Plekhg5	N/A		1.33157	2.41403	2.02146	1.05463	1.91653	2.02547	0.595193	1.14978	-2.17093	-1.43396	-0.497916	-1.81984	-3.61839	0.0514619	0.453174	-1.23488	0.244107	0.244107	-0.0124888	-1.23488	-0.0554533	-0.948538	-0.317344	-0.156879
ENSMUSG00000038179.13	Slamf7	N/A		1.80063	1.43139	0.63392	0.971664	1.79025	2.18033	0.81516	1.66483	-0.392758	-1.51614	0.0798635	-2.03284	-0.831642	-1.56861	-0.225482	-1.59988	-1.2791	-1.2791	0.0798635	-3.44787	0.0340567	-0.369299	2.33872	0.722051
ENSMUSG00000106212.1	RP23-114F4.2	N/A		-0.140594	0.12244	-1.75622	0.150676	0.952515	-3.04748	-0.434287	-0.0557754	0.200443	-1.04748	-1.75622	-3.61871	-1.24013	-1.72556	-0.756215	-1.75622	2.65296	1.20044	2.60134	2.76735	1.59637	0.476077	1.67005	2.94422
ENSMUSG00000098166.1	RP23-4F1.1	N/A		0.358159	-0.51631	-0.604535	-1.13505	1.29104	-2.96377	-1.13505	-0.217512	0.805618	0.220655	0.218587	-0.304975	-2.96377	-0.779345	-1.13505	-1.98305	2.25628	1.98619	2.03488	1.96181	0.599167	-0.293918	0.904479	1.39546
ENSMUSG00000002068.16	Ccne1	N/A		-1.08299	-1.08299	-4.01913	-0.697207	-2.25291	-1.08299	0.0132866	-4.01913	1.06901	1.23894	1.20091	1.42832	0.834548	1.87637	1.59825	1.20091	-0.00498676	0.0690136	1.33521	0.750252	-0.0829892	0.501973	0.972644	0.235679
ENSMUSG00000035105.5	Egln3	N/A		-0.466536	-0.322146	-3.94033	-0.75591	-1.90711	-1.1295	-1.27048	0.507124	-0.907109	-0.807573	-1.75591	0.507124	0.143517	-0.190902	-0.492876	-0.270483	1.14352	1.66058	1.8529	2.49202	1.47536	1.3079	1.65008	1.47675
ENSMUSG00000060586.10	H2-Eb1	N/A		1.33258	1.42244	-0.260213	0.184152	1.69289	1.77006	0.76279	0.314407	-1.41497	-1.98483	-0.339647	-2.4353	-2.15194	-1.43024	-1.18982	-1.91376	-0.984829	-0.0364614	0.902825	-2.99718	0.712138	1.07316	3.9214	3.05033
ENSMUSG00000073421.5	H2-Ab1	N/A		1.44766	1.77198	0.430802	0.705171	1.84229	1.91902	0.998122	0.68748	-1.29425	-1.09631	-0.743888	-2.05574	-1.67512	-1.23422	-0.66283	-1.33899	-1.26623	-0.83739	0.363208	-3.50892	0.0538435	0.368717	3.09276	2.03282
ENSMUSG00000024044.17	Epb41l3	N/A		1.26434	1.38987	-1.68318	0.179312	-0.19509	0.612265	1.50124	0.50124	-0.610127	-2.05759	-1.68318	-1.68318	-1.19509	-2.05759	-1.68318	-1.68318	0.389873	-0.19509	1.17931	-1.68318	1.26434	1.38987	4.38877	2.34924
ENSMUSG00000036594.14	H2-Aa	N/A		1.59586	1.66601	0.242025	0.456281	1.84773	1.88854	0.813036	0.715502	-1.16005	-1.29064	-0.666286	-2.11245	-2.0276	-1.24578	-0.655665	-1.22833	-1.12578	-0.767736	0.19194	-3.26553	0.153527	0.465936	3.25099	2.2585
ENSMUSG00000071537.6	Klrg2	N/A		0.0399685	-3.52297	-2.80657	-0.944072	0.731847	-2.07551	-2.80657	-0.622144	0.731847	1.92449	1.14339	0.640891	0.661457	1.54898	0.640891	1.81082	-0.853116	-2.07551	0.0559285	-2.80657	1.33953	1.54898	3.24575	2.44825
ENSMUSG00000061577.12	Adgrg5	N/A		1.74637	1.35273	2.26781	0.291059	1.60855	0.878949	1.5876	-1.58062	0.576709	0.738929	0.131581	0.0196133	0.689065	0.40738	0.411689	0.403954	-2.37868	-2.18835	-1.31503	-2.32785	-1.6983	-1.73335	0.356647	-0.246462
ENSMUSG00000061039.5	Olfr920	N/A		1.23019	1.77953	1.85308	1.15264	1.33207	0.779525	0.47457	1.15264	1.36449	-0.220475	1.19704	-0.387926	0.264952	-0.220475	-0.387926	0.676204	-1.5424	-2.12737	-1.52543	-1.04	-1.32001	-1.32001	-3.70985	0.54496
ENSMUSG00000028873.16	Cdca8	N/A		-0.0170808	-3.13256	-0.989669	-2.36818	-0.81063	-1.5476	-0.783218	-3.69011	1.43223	1.43223	0.894854	1.75283	0.491933	1.75821	0.982316	1.19253	-0.81063	0.867442	1.14278	0.216782	-0.193958	0.530407	0.557819	1.09125
ENSMUSG00000050921.12	P2ry10	N/A		-2.68878	0.495641	-3.24384	-0.0594118	0.495641	0.874153	0.3191	-3.24384	-2.68878	-1.24132	0.3191	-0.796377	-1.82629	-2.68878	-0.0594118	-3.24384	1.9286	2.26118	2.07809	2.34658	2.81757	2.26118	3.01098	2.57286
ENSMUSG00000051727.14	Kctd14	N/A		1.16717	2.4891	1.87292	0.831099	2.66967	1.75213	0.743636	1.65053	1.04164	-0.417792	0.444076	-2.25636	-1.41779	-2.28029	-0.256364	-3.11886	-2.28029	-2.28029	-1.25636	-3.11886	-0.832829	0.389563	3.3286	1.13595
ENSMUSG00000047793.13	Sned1	N/A		0.631042	0.505511	1.06381	-1.63663	0.74652	0.161557	-0.762162	0.422263	-1.07945	-1.36896	-0.762162	-0.899665	-1.53888	-2.53888	-0.0516682	-4.08409	1.78305	1.96891	1.58576	1.88693	0.461117	0.268472	1.8445	1.39312
ENSMUSG00000027583.13	Zbtb46	N/A		0.872334	0.954797	-1.89436	-0.178149	-0.514689	0.485311	-0.0578547	-1.24228	-2.21513	-1.40777	0.0531769	-2.11675	-1.0452	-1.63017	-1.89436	-2.11675	0.829266	1.56623	2.13118	0.507742	0.592227	1.51279	4.14378	2.66461
ENSMUSG00000031565.18	Fgfr1	N/A		0.197543	0.349546	0.0595534	-1.7478	-0.650454	2.11508	-1.7478	-2.6103	-2.83488	-1.38742	-0.425874	-1.16284	-2.83488	-1.38742	-2.6103	-2.6103	2.07201	1.41994	2.74405	0.71163	2.45388	0.48705	5.24088	4.15909
ENSMUSG00000062098.11	Btbd3	N/A		1.5837	2.21352	0.861277	1.36247	1.40616	1.33577	1.6718	1.43882	0.0138426	0.598805	-0.116697	-0.991166	-0.285718	-0.73823	-1.35374	-1.35374	-1.28572	-3.98616	0.362471	-2.35374	-1.07927	0.223296	0.0483623	0.423872
ENSMUSG00000001763.14	Tspan33	N/A		1.43207	2.174	1.91348	2.29681	1.76391	1.55137	1.83286	1.11784	0.43207	0.528286	0.389921	-1.02512	0.0335212	-1.42591	-0.522616	-2.61008	-4.28841	-0.840948	-0.703189	-4.47258	-1.25599	-0.103982	1.63785	0.144808
ENSMUSG00000026073.13	Il1r2	N/A		0.410009	1.60265	-1.08933	1.51401	0.509545	2.15724	-1.33034	0.636494	1.06209	0.602654	0.532157	2.08059	1.46064	1.64705	1.21023	1.27632	-3.25984	-2.39735	-1.98242	-3.78977	-1.39735	-2.39735	0.602547	0.339512
ENSMUSG00000066877.11	Nck2	N/A		-0.084022	-0.689743	-4.26331	-3.40081	-2.2133	-0.628343	-0.230885	-0.152882	-0.891377	-0.0433798	0.406545	1.12275	-0.259109	-0.512866	-0.941378	-1.23088	1.77538	1.34128	2.50608	2.13835	0.895219	1.31026	2.2574	1.78901
ENSMUSG00000091955.2	RP24-158L15.1	N/A		-0.0292716	0.131193	-0.0415535	-0.202018	-0.209844	0.837461	-0.00407839	0.344725	1.49798	0.342697	0.354375	0.625402	0.406827	0.0531907	1.0082	0.971046	-1.30938	-0.116735	-0.874444	-1.38259	-0.94681	-0.657303	-0.448179	-0.350882
ENSMUSG00000026546.16	Cfap45	N/A		1.61419	-0.555738	0.478245	0.611512	-0.555738	0.559739	0.278937	-1.47595	2.10723	0.559739	0.983481	0.43094	1.44426	0.666655	1.27894	0.733502	-2.1407	-3.0032	-1.01652	-4.33845	-0.1407	-0.555738	1.38203	0.653332
ENSMUSG00000103192.1	RP23-328G14.3	N/A		1.00711	1.84361	1.15691	1.60437	0.843611	0.106645	1.58012	-1.49517	2.60915	1.36968	2.00126	-0.215061	0.592072	1.78472	-0.302524	0.555457	-2.21528	-3.66274	-2.71756	-1.1326	-1.47832	-2.80025	-0.980596	-0.0545959
ENSMUSG00000105287.1	RP23-282L6.1	N/A		-1.72353	-0.138571	-0.979712	0.412606	0.446391	-0.553609	0.342216	-0.979712	-1.13857	0.0838211	-0.172357	-2.39475	-0.553609	-1.13857	-2.39475	-1.39475	1.89118	1.76832	1.635	2.52808	1.32086	-0.264102	1.37784	2.02029
ENSMUSG00000030149.15	Klrk1	N/A		3.2939	3.41738	1.88314	2.34852	3.10388	3.06843	1.82459	1.78126	-0.334694	-0.412697	0.423711	-3.57629	-1.77527	-1.12319	-0.447006	-0.991326	-3.58262	-1.77527	-0.447006	-4.57629	-0.882182	-2.99766	1.70911	0.0675673
ENSMUSG00000043541.16	Casc1	N/A		-0.048892	-0.218817	-0.730323	-2.31529	-0.411462	-0.633854	-1.31529	-2.31529	0.103111	0.781183	-0.145361	1.26968	-3.08131	-0.633854	-1.31529	-0.993358	1.30474	0.240615	2.54269	1.4396	1.91047	0.688074	1.63891	2.2393
ENSMUSG00000041498.13	Kif14	N/A		-2.091	-0.643545	-2.71213	-2.71213	-2.091	-2.091	0.735333	-0.527701	3.23092	3.81589	0.957726	1.54269	2.09342	2.41535	1.67393	1.67393	-2.091	-1.22851	0.150371	-2.71213	0.771493	-2.091	0.609802	1.3203
ENSMUSG00000035165.14	Kcne3	N/A		2.01108	1.70905	0.429207	1.35832	1.94549	2.05839	1.4682	2.26729	0.709054	0.326584	0.26175	0.326845	0.563623	0.841157	-0.0326972	0.239382	-2.67342	-2.31085	-0.551165	-5.62311	-3.15884	-2.02134	0.48731	-0.631335
ENSMUSG00000070803.6	Cited4	N/A		0.226681	0.0042882	-0.931692	-0.668657	0.326216	-0.410749	-3.25362	-0.446265	-1.25875	0.119765	0.44682	-1.66866	-2.58067	-3.44317	-0.668657	-0.794188	2.68611	3.46372	2.06831	3.29327	-0.410749	1.27731	0.994308	1.62902
ENSMUSG00000009376.15	Met	N/A		1.10157	2.42116	1.32714	0.747844	2.24402	2.49259	1.4206	0.700396	-0.120821	1.38647	0.653602	0.574466	-0.00744057	1.80947	0.535669	0.498324	-5.4337	-1.18578	-1.33063	-1.73081	-3.73327	-0.974273	-1.22692	-2.16969
ENSMUSG00000045672.15	Col27a1	N/A		1.18561	1.30225	1.63555	1.57254	1.46124	1.64918	1.22461	1.33504	0.230463	0.522644	0.974635	-0.0253658	0.37064	0.615753	0.647824	-0.327928	-3.06232	-1.13632	-0.376838	-5.09732	-1.21432	-1.92482	0.0871091	-1.64986
ENSMUSG00000033763.14	Mtss1l	N/A		-0.363731	0.636269	0.0371714	-0.225863	-0.685659	0.484267	-0.0452909	-0.325399	-1.36373	-1.68566	0.115174	-0.547791	-1.36373	-1.1007	-0.673322	-3.99525	0.314341	2.04226	0.996529	1.48196	1.56227	1.52379	1.48196	1.70014
ENSMUSG00000107017.1	RP23-253G12.8	N/A		1.88123	0.966959	2.34796	2.01167	2.20903	0.725951	1.75584	2.45793	-0.148519	0.266519	0.213307	-0.725292	-1.03304	0.310913	-1.98833	-0.5029	-1.14852	-1.14852	-0.609815	-4.17275	-2.14852	-0.733481	-0.0623269	-0.725292
ENSMUSG00000025887.10	Casp12	N/A		1.32756	0.771163	-0.158668	1.42629	0.590591	0.590591	0.426295	1.88573	1.32756	-0.731337	2.54177	0.841332	0.00562859	0.491055	0.648687	0.748223	-1.3163	-3.1788	-3.02116	-3.02116	0.268663	-0.146374	-0.158668	-2.15867
ENSMUSG00000029802.13	Abcg2	N/A		1.35534	1.62543	2.4465	1.21517	1.17477	0.791444	1.97702	1.41953	-0.272686	-0.48419	-0.0604596	-1.50103	-0.0316787	0.355345	0.820896	0.549593	-0.825227	-1.73212	-4.17088	-0.401497	-1.92476	-0.0316787	-0.986459	-1.30839
ENSMUSG00000038156.16	Spon1	N/A		2.46809	1.98046	1.25092	1.20407	1.73002	1.51678	0.965041	0.750823	0.271511	1.60749	0.953283	-0.11192	-0.215936	0.266458	1.07763	-0.875481	-3.71844	-1.62157	-1.14187	-3.65789	-3.3034	-0.98147	0.556235	-0.970829
ENSMUSG00000045404.16	Kcnk13	N/A		-2.94836	-3.81086	-1.39083	-0.506305	-1.3634	-1.62644	-0.698949	-2.09127	1.75208	1.00583	-0.233286	1.58116	1.44395	1.33704	-0.843339	0.741623	-0.0414724	0.636599	0.334998	0.791376	2.24146	1.37356	0.523443	1.79138
ENSMUSG00000023045.13	Soat2	N/A		-1.52114	-2.39561	-0.693741	-1.1412	-0.336714	-1.07368	-2.01567	-4.46313	1.01943	1.42882	1.30626	1.99928	0.228883	0.85232	0.569293	0.984331	1.30483	0.950167	1.12729	0.953957	0.0638242	-0.521138	0.0432243	1.33011
ENSMUSG00000032549.7	Rab6b	N/A		1.00861	1.00861	0.127475	1.66353	1.59358	1.82804	1.12747	2.47797	-0.75692	-2.49389	-0.387098	-3.05695	-0.271493	-0.908923	-2.19445	-0.194453	-0.75692	-0.378409	-0.0245283	0.390509	-0.378409	0.506114	-0.194453	0.264978
ENSMUSG00000020798.14	Spns3	N/A		0.990808	0.820883	0.541263	0.88415	1.0939	0.820883	0.469113	1.2281	1.23592	1.28031	0.643142	0.228105	0.93636	0.695352	-0.11585	0.505639	-4.62658	-1.17912	-1.35686	-3.81629	-0.304648	-1.76408	0.79842	-0.0089345
ENSMUSG00000062380.4	Tubb3	N/A		-0.750525	-0.750525	-3.46801	-0.798163	-0.461018	-1.92045	-1.02056	-3.46801	-0.920449	-1.11309	0.301373	0.394482	-0.335487	-0.750525	0.71641	0.853914	1.07955	2.40148	1.39448	1.52376	1.8869	1.63414	1.71641	1.85391
ENSMUSG00000007872.3	Id3	N/A		-0.461116	-1.04608	-5.10312	-2.0707	-0.0460782	-0.522516	-0.196228	0.0447803	-2.23872	-1.46112	-0.485734	-0.382641	-0.65376	-0.291191	-0.0706968	0.759378	1.82429	1.52378	0.888661	1.62974	1.52378	1.84874	2.26717	2.71938
ENSMUSG00000029304.14	Spp1	N/A		-1.23917	-1.23917	-2.99094	-2.99094	-2.68663	-0.824133	-0.543479	-2.12844	2.17587	3.19824	1.33099	2.67891	1.34579	2.53342	2.04148	2.82575	-0.0167778	-2.68663	0.0414834	-2.99094	-1.82413	1.26333	2.39512	0.33099
ENSMUSG00000034438.16	Gbp8	N/A		-0.0112691	0.0252566	0.310529	-0.512593	0.403768	-0.438691	-0.891105	-0.820715	-1.97474	-0.389781	-0.168639	-1.51259	-1.59623	-0.296671	-3.62807	-0.753601	1.31804	1.62219	2.27078	2.54852	0.657525	0.680608	1.32613	1.83136
ENSMUSG00000032271.13	Nnmt	N/A		-0.614387	-2.47688	-2.84698	-0.399519	-0.614387	-0.614387	0.600481	-0.984482	2.47308	2.38561	2.01552	2.89816	2.02947	2.2925	0.922409	2.68794	-2.47688	0.385613	0.600481	-2.84698	-2.47688	-0.292459	-1.98448	-0.662554
ENSMUSG00000104867.1	RP23-396K2.2	N/A		0.279963	0.489417	0.239357	-1.2525	0.527891	-1.72004	-0.208102	0.302093	-0.398108	-0.813146	-0.082571	-1.16503	-0.720037	-1.91268	-3.2525	-2.2525	2.22248	1.34605	1.94718	1.76987	0.894673	-0.196475	1.78093	2.17377
ENSMUSG00000115087.1	RP23-457L16.2	N/A		0.558728	-0.379871	0.0619946	-0.461567	-1.15748	-1.15748	-0.761128	-2.13964	0.494598	0.558728	1.03029	-0.21364	-0.264394	-2.96483	-4.32406	-0.761128	1.39272	2.26399	2.7576	2.12339	0.620129	0.0351665	1.06199	1.6259
ENSMUSG00000020785.17	Camkk1	N/A		-1.96665	-1.96665	-1.64962	-0.842261	-0.229684	-3.41411	0.257274	-2.64962	-0.381687	0.535851	-1.64962	-3.51211	-2.55161	-1.22968	0.809815	-1.06465	3.57767	3.5252	1.70794	3.0783	2.33103	1.77032	3.5792	1.93535
ENSMUSG00000059336.14	Slc14a1	N/A		1.93285	2.45642	2.08197	2.32298	1.51782	2.10278	1.1461	1.01486	-1.92964	-1.06715	0.622538	-1.05553	0.74021	0.517817	0.710001	-0.792499	-0.482183	-1.92964	-3.23996	-1.37746	-1.92964	-1.92964	0.944466	-2.37746
ENSMUSG00000058056.16	Palld	N/A		-2.86621	-1.16577	0.161633	-2.96765	-0.473895	-0.866212	-0.880187	-4.83015	-0.778749	-0.778749	0.0767446	0.760271	-0.778749	-1.69629	-0.323793	-0.444088	2.94114	2.44667	2.21226	2.62481	2.2106	1.80621	1.96309	1.64706
ENSMUSG00000000303.12	Cdh1	N/A		-2.31634	-2.31634	-1.01877	-4.20319	-0.6159	-2.73138	0.703697	-0.881265	0.207222	0.590551	-2.01877	0.303159	-0.508985	0.590551	0.359743	-0.340697	1.85359	2.81294	1.7037	2.71459	1.70603	0.728055	1.80905	0.868756
ENSMUSG00000023032.12	Slc4a8	N/A		-2.45457	-3.90203	-1.6848	-1.46241	-1.7176	-0.132642	-1.6848	-1.09984	1.74183	0.604324	-0.569321	0.817702	0.604324	0.960468	-0.0218329	0.900165	2.13039	1.08975	1.3152	-0.0998354	1.2084	-0.132642	1.53759	2.05217
ENSMUSG00000034848.17	Ttc21b	N/A		1.22145	0.99906	1.44712	1.85558	0.0515275	0.4921	0.366198	0.309614	0.288567	0.288567	0.250721	0.710152	-0.111971	0.601725	-0.427351	1.05808	-1.4339	-1.17086	-4.19674	-2.74928	-1.17086	-0.055388	1.12519	0.250721
ENSMUSG00000042616.8	Oscp1	N/A		-2.04734	0.622516	-2.39322	-0.208794	-1.18484	-2.04734	-2.39322	-1.53072	-0.184839	0.137089	-0.530722	1.05424	0.400123	0.815161	-0.208794	-0.208794	2.13709	1.72205	3.42347	1.92871	-0.184839	-0.184839	-0.208794	1.27663
ENSMUSG00000104488.1	RP23-328G14.2	N/A		1.59223	1.5065	1.32362	0.893314	1.38365	0.619713	0.933671	0.819852	1.53565	0.318057	1.2295	-0.0763121	1.15858	1.91416	-0.438883	0.213194	-2.30085	-4.9707	-1.20184	-1.49135	-1.10821	-1.64878	-1.60238	-0.602381
ENSMUSG00000060962.12	Dmkn	N/A		-2.41882	-2.41882	-2.29825	1.47114	0.0286372	-0.556325	-2.29825	-0.113822	2.80123	3.42095	1.81218	3.65171	1.6136	2.08753	2.3716	2.73417	-2.41882	0.0286372	-2.29825	-2.29825	0.251029	-2.41882	-2.29825	-0.43575
ENSMUSG00000101969.2	RP23-360M11.1	N/A		0.0766685	1.07667	0.388792	-1.19617	-0.24526	-2.10776	-2.05867	0.388792	-2.10776	-1.24526	-0.611208	0.125758	-2.10776	-2.10776	-2.05867	-1.19617	3.42717	3.07667	3.8262	2.55872	1.3397	0.924665	-2.05867	1.89129
ENSMUSG00000027254.13	Map1a	N/A		0.659686	-1.66224	-2.2478	-2.2478	-1.66224	-2.52474	-0.385299	-2.2478	-2.52474	0.145113	0.614701	0.199663	-2.52474	0.507683	-1.3853	-0.800337	2.46704	1.58569	2.36959	0.784626	3.19574	2.33776	2.52159	2.82415
ENSMUSG00000017737.2	Mmp9	N/A		-1.87104	-1.87104	-0.143298	-2.59076	-1.87104	-1.87104	-2.59076	-1.72826	0.798812	-1.87104	0.593668	0.27174	-1.00854	1.79881	1.07909	1.27174	-0.00854254	-1.87104	0.0790946	-0.143298	4.62081	5.02488	1.27174	2.62929
ENSMUSG00000035735.10	Dagla	N/A		-0.764647	-2.69065	-1.65424	-0.269572	0.0748882	-0.925112	-1.91727	-0.91727	0.479279	0.542014	0.515689	0.667692	0.918162	1.21624	0.957199	1.02133	-0.764647	-1.10568	0.365664	-2.65424	1.77533	1.24481	2.00873	1.87628
ENSMUSG00000079056.12	Kcnip3	N/A		-0.895192	-1.75769	0.112137	-0.402436	-1.75769	1.10481	-0.624829	-1.20979	-0.895192	-1.75769	-1.62483	-1.20979	-1.75769	0.104808	-3.07229	-0.402436	2.68977	1.10481	0.790209	1.59756	1.80525	2.0117	3.14776	2.89873
ENSMUSG00000052698.15	Tln2	N/A		-1.9704	-3.29233	-0.659848	0.718663	-1.48497	-2.70737	-0.281337	-1.98178	2.97446	2.3801	1.51008	2.22768	2.57804	2.08271	1.30363	2.37578	-1.48497	0.0999904	-1.98178	-2.39681	-0.204865	1.0296	0.340152	-1.17442
ENSMUSG00000104525.1	RP23-445K23.3	N/A		-0.934986	-0.934986	-1.94818	-0.445682	-0.394418	-4.25691	-0.00958252	-2.21122	-0.394418	-0.14649	-0.72579	-1.07371	-0.14649	-0.693978	0.373746	-1.72579	2.12914	2.22029	1.89312	2.23504	2.06501	1.48823	1.6166	2.02144
ENSMUSG00000106472.1	RP23-114F4.4	N/A		-0.146505	-0.146505	-1.58036	-2.38772	-0.387513	-2.03959	0.612282	0.256138	-0.599017	-0.67702	-0.13979	-0.928286	-0.599017	-0.846945	-2.38772	-1.80276	1.92124	1.79691	2.16687	1.78221	0.738018	0.985945	2.22699	2.18214
ENSMUSG00000022408.7	Fam83f	N/A		0.290405	0.342872	1.12336	0.448765	1.3037	1.02737	1.25612	0.748326	0.601607	-0.216555	0.702522	0.977145	1.57991	0.705442	1.25612	0.529685	-2.14255	-1.55759	-5.11417	-1.55123	-0.37702	-1.55759	-0.551235	0.174591
ENSMUSG00000041420.18	Meis3	N/A		-0.492333	-1.93979	-0.852732	0.469196	-0.492333	-1.93979	-0.852732	-2.43769	-1.0773	-1.0773	-0.63034	-0.437695	0.73006	-1.93979	-0.437695	-1.43769	1.38214	1.09263	2.29023	1.81023	2.8769	2.8769	1.56231	0.954623
ENSMUSG00000112766.1	RP23-202A18.4	N/A		1.47446	1.40045	1.49711	0.61447	0.474455	-0.110507	1.65886	0.314909	1.268	0.52176	1.47245	0.743753	1.027	0.73749	-0.68509	0.743753	-2.43244	-1.62508	-0.926098	-4.24803	-1.62508	-1.11051	-0.800567	-0.38553
ENSMUSG00000038209.12	Itln1	N/A		-0.353993	-0.650975	-0.790378	-0.320893	-0.735864	-1.07982	-1.16889	-0.683463	-0.610333	0.369489	-0.790378	-0.0313864	-2.07982	-0.972903	-1.49082	-0.905855	1.64601	2.97463	-0.16889	2.95213	0.559592	0.933987	1.46338	1.93545
ENSMUSG00000037849.8	RP23-85A8.1	N/A		3.72782	2.75128	1.65498	1.87334	3.28358	3.85958	1.05715	2.33177	0.256514	-1.98053	0.839916	-1.02258	0.341403	0.21212	1.28286	0.0415502	-0.980525	-5.65038	-2.16008	-2.57512	-1.61795	-4.20292	-0.42673	-2.89705
ENSMUSG00000053931.11	Cnn3	N/A		2.59716	2.84688	1.18335	1.31662	2.61971	2.40289	1.55109	1.9434	0.415833	0.608478	0.0365138	-0.770841	0.363366	0.252334	0.688591	-0.126985	-2.39152	-4.25402	-0.185879	-4.63334	-3.39152	-2.06959	0.183355	-1.18588
ENSMUSG00000003418.11	St8sia6	N/A		2.66761	2.21831	1.6766	2.48395	2.35076	2.77525	1.962	2.08032	0.0414286	-0.897171	-0.3234	-2.58643	-1.67478	-1.89717	-0.384801	-1.3234	-1.16021	-2.16021	-0.586435	-4.77086	-1.48213	-0.781694	1.39542	0.377039
ENSMUSG00000051212.8	Gpr183	N/A		1.47946	1.20976	1.42757	1.21287	1.23623	1.75316	0.692204	1.52028	0.907731	0.698998	0.564497	0.335316	0.584155	0.468334	0.68688	0.593237	-2.58165	-2.96017	-0.651138	-5.80764	-1.09887	-1.69713	0.37558	-0.949661
ENSMUSG00000026768.10	Itga8	N/A		2.79465	3.21846	2.17081	2.8199	2.60702	3.01201	1.29634	1.4302	-1.34051	-3.14786	-1.17315	-1.41415	-0.688433	-4.01036	-1.06623	-0.551657	-0.240974	0.806331	-2.06623	0.213878	-0.447425	-2.5629	0.213878	-1.87359
ENSMUSG00000027670.4	Ocstamp	N/A		1.6111	1.10209	0.776093	0.734273	-0.790998	0.102086	1.13866	-0.893758	1.95624	2.72357	0.734273	2.12254	0.925209	1.48911	0.290666	1.17037	-2.59835	-3.46085	-2.35319	-4.21569	-3.46085	0.401647	0.601006	-0.105262
ENSMUSG00000026888.14	Grb14	N/A		0.249724	1.02024	1.37944	0.414207	0.410188	0.685823	0.109352	0.665745	1.33219	1.06915	1.90453	0.343817	1.68582	1.11646	1.99917	1.48132	-1.83774	-1.51581	-3.84061	-3.84061	-3.70024	-0.515811	0.191814	-0.808186
ENSMUSG00000032216.14	Nedd4	N/A		2.101	2.28741	0.904596	1.56756	1.24302	2.79761	1.17761	1.27383	-2.61948	-2.61948	-0.510442	-3.54286	-2.61948	-2.61948	-0.358439	-2.68037	-0.756983	0.82798	0.407096	-2.68037	1.41294	0.564945	2.56756	1.87422
ENSMUSG00000040441.10	Slc26a10	N/A		-1.04006	-0.501638	-1.44932	-0.556237	-0.303092	-1.47818	-1.93475	0.387179	0.0911865	0.0594778	-0.349786	-0.00874901	-0.704455	-0.184448	-0.349786	-0.671714	1.01057	1.15259	0.952776	1.7206	0.686566	1.21148	1.38718	0.872606
ENSMUSG00000021340.13	Gpld1	N/A		1.10029	-1.40221	0.622951	-0.270134	0.100291	-0.987171	0.244439	0.0924358	1.89547	1.33476	2.20791	2.4771	1.99011	1.89547	2.31483	2.62295	-1.17982	-1.66524	-1.49253	-2.93999	-3.84967	0.767716	-2.93999	-2.93999
ENSMUSG00000054675.5	Tmem119	N/A		-1.66143	-1.33951	-3.67568	0.710377	0.586494	0.338566	-1.81318	0.508743	-0.339506	0.508491	0.771778	1.14101	1.19655	0.862128	2.20918	1.7414	-3.52393	-1.66143	-1.81318	-3.67568	2.44709	2.58649	1.80153	2.09371
ENSMUSG00000022122.15	Ednrb	N/A		-1.64751	-0.910545	0.0562692	-1.26566	-3.23247	0.625508	-0.150182	-2.04327	1.91727	1.62551	0.793234	0.982268	1.91727	1.52241	2.12666	1.74929	-1.06255	-3.23247	-1.85062	-2.04327	1.35249	1.12508	1.10357	0.541696
ENSMUSG00000037999.13	Arap2	N/A		-2.11248	-0.588916	0.0797601	-0.0430965	-0.942553	-0.254498	-0.780062	-1.44749	-1.20559	0.531378	-0.676969	0.272405	-2.79055	-0.254498	-2.94999	-1.01139	2.58101	2.63571	1.79597	2.5149	0.313787	2.08719	1.15155	1.09441
ENSMUSG00000115794.1	RP23-262F9.15	N/A		-0.639687	-1.12511	0.431503	-3.15346	-0.639687	0.0123899	-2.15346	-1.83153	0.253398	-0.862079	-0.346105	-0.568497	-1.12511	-2.44704	-0.45302	-0.694028	2.68224	2.76241	2.61473	2.67943	0.253398	0.874886	1.6279	1.84654
ENSMUSG00000091530.1	Cldn20	N/A		-0.621192	-0.843584	-0.567866	-2.37522	-1.10662	-1.84358	-1.56787	-4.23772	0.571453	0.378808	1.0171	-0.0532928	0.0308847	-3.29104	0.017097	-0.567866	1.99772	2.47834	2.99982	2.62478	0.819381	1.42943	1.17937	1.53167
ENSMUSG00000001507.16	Itga3	N/A		-0.439973	-0.439973	-2.74096	1.209	-2.30247	-2.30247	-2.74096	-0.0711129	-2.30247	0.560027	-1.87847	0.291457	-2.30247	-0.118045	-1.87847	-2.74096	2.68931	2.72995	2.58096	3.05227	2.08359	2.14499	2.36946	2.5478
ENSMUSG00000040213.13	Ccbl2	N/A		-0.239904	-0.391907	0.0455627	0.811098	0.138607	1.02313	0.89356	0.308597	2.48256	1.93002	1.2472	1.1499	1.83049	1.56745	0.424074	1.04556	-1.2399	-2.56183	-1.27637	-3.27637	-2.56183	-1.97687	0.581615	-1.95444
ENSMUSG00000056476.13	Med12l	N/A		1.61665	1.22671	2.93951	2.08707	2.06917	1.17608	2.16507	1.67203	0.368727	0.45619	-0.275502	0.376575	-1.30935	0.0691664	-2.94535	-1.08286	-0.823918	-3.49377	-1.49789	-2.94535	-1.04631	-0.309345	1.00461	-1.49789
ENSMUSG00000027230.9	Creb3l1	N/A		-0.613002	-1.93493	-0.146572	-1.44613	-1.613	-1.12758	-0.754254	-0.62301	-0.0280395	-0.475498	-0.339217	-0.561609	-1.34997	0.152533	0.408017	-1.14657	2.13116	1.61966	0.345282	1.36122	2.17359	1.06507	1.52585	1.37699
ENSMUSG00000079339.6	Ifit1bl1	N/A		1.91583	2.07233	0.958651	1.57455	1.84499	2.16123	1.48435	1.72655	-2.9036	0.178865	-0.332345	-1.82215	-1.94667	-0.968692	0.33062	-0.884886	-0.841313	-0.37635	-0.967348	-0.247456	-0.467498	-0.669132	-0.967348	-0.853177
ENSMUSG00000094626.1	Cecr6	N/A		1.1131	-1.00237	0.495733	-0.397352	0.936226	-2.00237	0.117221	-2.20471	-1.58734	-1.00237	-0.882779	-0.882779	-0.779981	-2.00237	-1.20471	-2.20471	2.45706	2.7877	2.00475	2.86138	0.500127	0.58259	1.04322	1.25472
ENSMUSG00000028832.11	Stmn1	N/A		-3.92912	-2.48166	-4.38948	-0.526983	-3.92912	-0.481663	-1.20506	-1.94202	3.31708	3.15254	1.2279	2.20094	1.57723	2.81602	1.6023	0.758419	-0.481663	-0.0666261	0.6023	-0.826544	0.325692	0.181302	1.7398	0.758419
ENSMUSG00000068744.12	Psrc1	N/A		-0.746764	0.101233	-1.04409	0.0433764	0.323626	-0.368253	-0.343647	0.277842	1.6862	1.28886	1.0852	2.022	1.4859	1.7642	2.022	1.68383	-2.48373	-1.48373	-0.584655	-3.90658	-1.74676	0.179235	0.203841	-1.45912
ENSMUSG00000022240.10	Ctnnd2	N/A		-0.398129	-0.813166	-3.06041	-3.06041	-0.813166	-2.26063	-1.19791	-2.19791	-2.26063	0.186834	1.60944	-0.875985	-1.39813	-0.813166	-2.19791	-1.61295	1.30231	1.7718	3.77937	0.387049	2.8498	2.64627	4.85737	3.57027
ENSMUSG00000030109.15	Slc6a12	N/A		-2.09099	-0.643534	-2.1473	2.41563	0.0934317	-0.643534	-1.28481	-2.1473	-2.09099	-1.2285	-2.1473	0.300158	-2.09099	-2.09099	-2.1473	-2.1473	3.26336	3.47194	3.44312	3.38762	2.57886	1.47194	0.300158	2.17463
ENSMUSG00000050122.18	Vwa3b	N/A		-0.213176	-0.476211	-0.366954	-0.589346	-2.21318	0.449789	-2.17431	-0.174309	0.289324	-1.79814	-0.366954	0.825691	-1.79814	-0.798139	-1.58935	-3.03681	2.81657	2.43068	2.84806	2.58058	1.20186	0.108752	0.633046	1.41065
ENSMUSG00000033952.14	Aspm	N/A		-0.914499	-0.455067	-1.95562	-3.40307	-2.32954	-0.914499	0.459422	-0.733223	2.95587	2.71486	2.72621	2.07413	1.51177	2.27533	1.15986	2.10328	-1.9145	-1.32954	-1.21865	-1.54058	-1.59257	-0.00760794	-1.21865	1.54689
ENSMUSG00000035441.14	Myo1d	N/A		-2.59873	0.585699	-1.10353	-1.10353	-2.59873	-2.59873	-0.366562	0.218401	-2.59873	-2.59873	-1.68849	-1.36656	0.433696	0.0711262	-0.518565	-0.229058	2.99169	2.39305	1.73778	1.52096	3.04513	3.47322	1.63344	1.26571
ENSMUSG00000109555.1	RP23-218E6.3	N/A		-0.472197	-0.365282	-1.18924	-0.314767	-1.36528	-2.17264	0.313264	-3.63669	-0.265746	-0.713205	-0.314767	-1.45227	-1.00271	-0.713205	-0.774199	-3.63669	2.51386	2.67285	3.37555	3.15654	1.14929	0.734254	1.98069	2.49259
ENSMUSG00000026605.14	Cenpf	N/A		-0.72909	-0.314053	-0.584095	0.186423	-1.12141	-0.79948	-0.671558	-1.0866	3.02834	2.74896	1.29423	1.68599	1.63348	2.64014	0.537896	1.80418	-1.21452	-1.53645	-2.0866	-1.76467	-1.53645	-2.79948	0.498367	0.186423
ENSMUSG00000024056.9	Ndc80	N/A		-0.542696	-1.12766	-3.99666	-3.99666	-1.27966	-0.542696	-0.812235	-1.5492	-0.990155	-0.127659	0.509693	-0.812235	-1.64223	-0.449587	0.258154	0.113764	1.19427	2.25085	2.6472	2.6073	1.33177	1.92545	2.35769	2.67319
ENSMUSG00000004633.17	Chn2	N/A		1.4544	2.63688	1.51928	1.85903	1.12842	2.04476	0.93432	1.19123	0.107953	-0.16335	-0.333613	-1.86086	-0.933867	-2.21398	-0.247883	-1.94832	-1.21398	-1.6994	-0.73887	-1.94832	-0.933867	-0.213975	1.09607	0.477942
ENSMUSG00000102721.1	RP23-328G14.1	N/A		0.977773	1.41558	1.94348	1.22019	0.882914	0.481815	1.16469	0.106975	1.57145	0.518341	1.28668	0.374908	1.27323	1.22984	-0.185807	0.721084	-1.28003	-4.21862	-1.60084	-2.92277	-0.633662	-2.21862	-1.92277	-0.185807
ENSMUSG00000023046.6	Igfbp6	N/A		-0.856071	-1.178	-1.79283	-0.207865	-1.59304	-3.0405	-1.05586	-3.24029	1.34556	1.90946	0.944138	2.50485	1.7762	1.34556	2.29464	2.35013	1.06993	0.406963	-0.37779	-1.79283	-0.00807428	-1.178	0.429565	-0.0558617
ENSMUSG00000026062.12	Slc9a2	N/A		-0.116201	-0.531239	-2.04844	-2.04844	-1.9787	-0.531239	-2.04844	0.399021	-1.9787	-0.116201	0.135986	-1.18594	-1.9787	-1.1162	-2.04844	-2.04844	3.05372	3.43839	3.5145	3.88015	-1.1162	2.97126	1.5145	1.98398
ENSMUSG00000080917.2	AC171680.3	N/A		-1.07429	-1.2263	-3.43261	-1.43261	-2.07429	-2.39622	-0.373713	-0.373713	-0.308757	0.996098	-0.262681	0.505993	-0.39622	-0.308757	-1.43261	0.111714	1.51067	2.15837	1.98243	1.42537	0.961332	2.15837	1.35747	1.92495
ENSMUSG00000026358.13	Rgs1	N/A		-1.094	-0.0939982	-0.419896	-1.00486	-1.95649	0.490964	-4.45232	-3.58982	-1.95649	-1.95649	-0.589821	-0.682931	-1.95649	-1.95649	-0.13039	-1.00486	3.22793	3.52071	1.93374	4.57005	2.36543	1.36543	1.73211	3.639
ENSMUSG00000001120.15	Pcbp3	N/A		2.14739	1.85193	1.32266	2.42575	1.64043	1.60195	0.737698	1.56777	-0.6075	-1.02254	0.0272043	-1.84726	-1.02254	-2.02254	-0.847265	-2.43223	-1.02254	0.916062	-0.624872	0.268212	-0.437575	-2.02254	0.0272043	-0.624872
ENSMUSG00000086049.1	RP23-191E3.18	N/A		-1.27318	-1.27318	-0.637677	-2.44503	-0.536218	-1.05079	0.0143993	-3.30753	-0.858146	0.229317	0.13993	0.642431	-0.688221	-1.05079	-0.86007	-0.445032	2.2916	2.07259	2.72489	2.10956	0.78571	1.35131	0.554968	1.50916
ENSMUSG00000041552.7	Ptchd1	N/A		2.27009	2.91054	1.97826	1.69815	2.67448	3.22702	1.59124	2.99932	-0.817378	-0.817378	-0.301847	-2.9717	-1.23242	-2.67987	-0.524239	-2.1092	-2.67987	-0.817378	-1.52424	-1.52424	-2.67987	0.642054	0.212727	0.475761
ENSMUSG00000029372.7	Ppbp	N/A		-0.200694	-1.66013	-0.811204	-1.07424	-2.07516	-1.66013	-3.25866	-3.25866	0.427337	0.147229	1.96139	0.691296	0.661802	-0.338198	1.35872	0.304273	1.09476	0.799306	0.188796	2.46181	1.5098	1.29407	0.188796	1.24769
ENSMUSG00000031494.7	Cd209a	N/A		4.84215	5.49616	2.95334	3.29879	4.60436	5.57274	3.32575	3.57087	-3.69277	-2.24531	0.222942	-5.09899	-2.83027	-3.69277	-2.06656	-5.09899	-1.50834	-1.02292	-0.0270362	-3.65153	-1.83027	-3.69277	2.22294	0.348473
ENSMUSG00000022479.15	Vdr	N/A		0.673483	0.535979	1.41324	-0.35229	0.120942	0.914491	0.828282	1.23267	1.07203	1.67348	0.441259	0.870102	0.461979	1.79901	1.35553	1.13314	-1.78595	-3.64845	-4.12168	-1.25918	-0.616024	-1.20099	-0.0892553	-1.45183
ENSMUSG00000072949.6	Acot1	N/A		-0.561611	0.312858	1.40771	1.1276	-1.14657	0.853426	-2.67975	-0.509828	1.71141	2.06288	2.02069	2.76319	2.10135	2.80762	1.27444	2.04817	-3.00907	-2.14657	-3.54225	-1.67975	0.023351	-3.00907	-1.35782	-0.872398
ENSMUSG00000042286.13	Stab1	N/A		-1.3621	-5.31206	-1.53139	-1.16882	0.0422912	-0.926	-1.87932	-1.01682	1.26468	1.20865	0.568143	0.727342	1.70019	1.6379	2.03629	1.3755	-1.05724	-1.20163	-0.94643	-2.33875	2.09733	1.90799	2.12068	2.05357
ENSMUSG00000089762.3	Ier5l	N/A		1.29925	1.84358	1.18513	1.83936	2.38672	2.59694	1.46385	0.341856	-0.285707	1.10661	0.89825	-0.353289	0.0362206	-0.285707	0.424319	0.298788	-3.1482	-0.700745	-1.16064	-1.57568	-1.70074	-3.1482	-2.42368	-0.938251
ENSMUSG00000078452.10	Raet1d	N/A		-0.924049	-2.37151	-1.53424	-1.53424	-1.50901	-2.37151	-1.53424	-1.53424	3.44518	0.812916	1.13562	2.23515	2.44518	2.34897	2.72058	2.13562	-0.187084	-2.37151	0.328261	-1.53424	1.19143	-0.509012	-1.53424	0.650189
ENSMUSG00000086670.1	RP23-349P20.2	N/A		-0.103747	-1.51878	-2.87339	-1.01089	-0.518785	-1.51878	-1.01089	-0.203536	-0.518785	-0.518785	0.159034	-0.010891	-0.781819	0.0661778	-1.42593	-1.01089	2.10571	2.10571	2.896	2.23704	0.983716	0.218181	1.94331	0.311037
ENSMUSG00000025920.19	Stau2	N/A		-2.65566	-3.24063	-0.240093	-1.31048	-0.540186	-1.43327	-1.46249	-1.82506	0.40323	0.617355	-0.931971	0.411983	-0.240626	-0.540186	-0.462486	0.367589	2.04478	2.04478	1.89115	0.652991	1.51426	2.02616	1.49687	1.41198
ENSMUSG00000034226.7	Rhov	N/A		-2.30046	-2.30046	-2.37034	0.662081	-2.30046	-2.30046	-2.37034	-2.37034	3.11663	2.60643	2.1926	3.66208	1.88396	2.36939	2.07712	2.81408	0.369392	1.147	-0.507844	-2.37034	-0.853001	-1.43796	0.951587	-2.37034
ENSMUSG00000091996.8	RP24-166B2.2	N/A		-1.82809	-1.82809	-1.11615	0.758324	0.0344025	-1.82809	-0.37918	-2.5636	-0.380635	-0.965598	-1.11615	-2.5636	-0.380635	-1.82809	-2.5636	-0.37918	1.49383	2.28233	1.62082	2.58429	2.73484	2.49383	2.69121	3.02681
ENSMUSG00000001403.13	Ube2c	N/A		-3.90673	-1.72231	-1.14237	-2.03546	-1.45927	-2.45927	-2.25785	-0.0354595	3.40698	2.6562	1.66498	2.30693	2.96699	3.03258	2.01517	2.641	-2.04424	-0.459273	0.327111	-3.84281	-0.722308	0.710652	0.157186	0.20158
ENSMUSG00000027276.7	Jag1	N/A		0.64427	1.35322	-0.0698323	0.856167	1.17265	0.587687	1.08937	0.345205	-2.47121	-2.05617	-0.584405	-0.88926	-2.24881	-1.24881	-2.97672	-1.39176	0.528793	1.52879	-0.118742	1.88126	0.943831	1.26576	0.881258	0.977473
ENSMUSG00000031373.4	Car5b	N/A		-0.518797	-2.10376	-3.90787	-3.90787	-1.10376	-1.10376	0.761977	0.202549	1.52851	1.76414	1.88536	1.97699	1.45696	1.91416	2.04208	2.27655	-1.61833	-0.518797	-1.04538	-1.04538	-0.17776	0.481203	-0.585947	1.34694
ENSMUSG00000116433.1	RP23-129J8.3	N/A		-2.56895	-0.983986	-0.023051	-1.02305	-0.399024	-2.56895	-0.175054	-2.34498	0.600977	0.0160141	0.239984	-1.02305	-2.56895	-0.109517	-3.20748	-3.20748	2.89048	3.07491	2.65502	2.92181	2.01601	0.600977	2.69941	2.48791
ENSMUSG00000025150.10	Cbr2	N/A		1.15787	1.33071	0.490811	0.107482	0.283402	1.25915	1.39127	0.628314	-1.03853	-0.536026	0.713203	-1.09415	-0.231171	0.131399	0.0433517	0.713203	-4.48599	-0.923049	-4.27858	-2.83112	1.86836	1.18387	2.28436	1.83185
ENSMUSG00000049001.5	Ndnf	N/A		1.43645	2.07518	1.8486	0.946445	2.79088	2.91403	1.61562	1.87369	-0.4079	-0.166892	-1.66236	-0.814366	-0.867332	-0.282369	0.301111	-0.46073	-3.86733	-1.69741	-1.52486	-1.66236	-1.86733	-0.0599766	-1.28385	0.823063
ENSMUSG00000035385.5	Ccl2	N/A		1.06637	2.44077	1.50447	0.434079	1.26568	2.72087	0.527188	1.30855	-1.36659	0.218374	-0.0804939	-0.150884	0.559411	0.703801	1.1419	1.40983	-3.55101	-3.55101	-4.33531	-1.01338	0.0119233	-0.518591	-0.665457	-0.0804939
ENSMUSG00000017493.12	Igfbp4	N/A		2.01678	1.94043	1.75076	1.49138	1.90872	2.28723	0.254337	1.78683	0.971457	0.664795	0.656435	0.576265	0.77442	0.586793	0.76891	0.201869	-4.44563	-1.99817	-1.38309	-4.41551	-1.1237	-3.58313	-0.30509	-1.38309
ENSMUSG00000029516.19	Cit	N/A		-0.197296	-3.28476	-2.79228	-1.33285	-1.11483	-1.28476	-0.885394	-0.704822	2.38767	1.8027	1.61711	1.39754	1.10756	1.75963	0.731277	1.23008	0.470129	0.41568	0.493118	0.417169	-0.584319	-1.4774	-0.332853	0.161911
ENSMUSG00000036887.5	C1qa	N/A		-1.87322	-2.73571	-0.105065	-1.69003	-1.87322	-2.73571	-0.105065	-2.55252	-0.873217	-0.0658624	-1.69003	-1.10507	-2.73571	0.296708	-2.55252	0.309972	1.82722	0.448711	-2.55252	1.70229	5.37945	4.94056	4.97531	5.36525
ENSMUSG00000087196.1	RP23-466D3.1	N/A		1.36502	1.15425	1.51946	1.48247	1.41999	1.4467	1.77793	1.30315	0.945306	0.5365	1.12257	0.405508	0.765983	0.848445	0.675115	0.122574	-2.99955	-1.86205	-1.26076	-5.64681	-1.62104	-1.99955	-0.574864	-0.926336
ENSMUSG00000032218.7	Ccnb2	N/A		-1.11442	-3.81486	-0.757377	-4.07931	-2.81486	-2.2299	-0.0468836	-3.21681	3.2075	2.94002	1.99264	3.31457	1.81449	2.61976	1.80556	2.89172	-0.355432	0.0920272	-0.516369	-1.04688	-0.114424	-0.229901	-1.40945	1.06859
ENSMUSG00000045763.8	Basp1	N/A		-3.67758	-0.429656	-1.23936	-1.39136	-0.590121	-0.154022	0.220073	-1.23936	-3.67758	-0.285266	-0.753932	-0.976325	-1.09262	-0.507658	-1.56129	-1.86085	2.02286	2.39923	1.11114	1.83103	2.59854	3.39388	2.89404	2.96619
ENSMUSG00000090722.8	RP24-357I4.2	N/A		-0.0340703	-0.449108	0.425745	1.59567	-0.449108	-1.89657	-2.43675	-0.574255	-0.449108	-1.89657	-2.43675	-2.43675	-1.89657	-1.89657	-2.43675	-2.43675	4.11568	2.92013	2.6352	3.04045	2.96593	-1.03407	2.6352	2.42575
ENSMUSG00000089665.2	Fcor	N/A		1.03633	0.451363	-0.38807	0.196892	-0.548637	1.37736	0.0713613	1.82138	0.714397	0.93679	0.859857	1.00425	1.82987	1.37736	2.36682	1.89733	-1.87057	-1.2856	-3.25057	-1.38807	-2.73306	-1.2856	-0.803108	-2.38807
ENSMUSG00000022237.17	Ankrd33b	N/A		-1.31602	-3.12338	-1.55321	-2.69071	-1.12338	-3.53841	-0.257751	-1.10575	-1.12338	-0.0789814	-1.01264	0.479215	0.876625	1.52048	0.0748243	1.55722	0.783515	0.461587	0.479215	-0.368783	3.51325	3.14809	2.05345	2.34491
ENSMUSG00000022096.14	Hr	N/A		-1.44065	-1.44065	-3.57331	-3.57331	0.296318	0.144315	-0.251379	0.19608	-0.855685	-1.02561	0.096544	-2.71081	-3.02561	-0.218256	-0.903456	0.096544	1.49795	1.78174	2.82835	2.35528	2.20321	2.08291	2.82835	2.61112
ENSMUSG00000103867.1	RP23-445K23.5	N/A		-1.28832	-3.15081	-0.690098	-2.55259	-1.28832	-2.28832	-2.55259	-2.55259	-0.118391	-0.288316	1.3099	-1.10514	0.412124	0.412124	-2.55259	-0.690098	2.23525	2.06924	3.64975	3.16788	2.41212	0.88161	2.55783	2.01034
ENSMUSG00000017400.10	Stac2	N/A		-1.08854	1.17449	0.612254	-0.00923395	0.0489633	0.91146	-0.250242	0.377789	2.0158	1.28997	1.29033	1.19722	2.67699	2.0158	1.93418	2.09768	-3.27296	-1.08854	-0.902319	-3.57217	-1.41047	-3.27296	-1.38775	-1.38775
ENSMUSG00000047205.12	Dusp18	N/A		0.912531	1.37398	0.837859	0.391457	0.867443	0.658348	1.28454	1.28454	0.618083	0.365897	0.375516	0.960478	1.29104	1.32479	0.343094	0.51302	-3.78791	-1.86191	-0.592775	-3.11634	-0.900384	-0.861909	-1.20945	-1.07194
ENSMUSG00000054342.8	Kcnn4	N/A		-1.96301	-1.08854	-1.61933	-2.32982	-0.641078	-2.96301	-1.26569	-1.08881	1.09589	0.975594	0.686483	0.496151	0.406228	1.20692	0.89725	0.210749	0.0958877	0.878296	0.496151	0.400574	0.259387	1.73743	1.99865	1.11764
ENSMUSG00000096929.7	RP23-445K23.4	N/A		-0.108482	-1.60729	-1.23015	-0.12581	-1.08646	-2.13085	-0.342621	-1.96711	-0.704586	-0.176654	-0.230146	-0.851635	-0.153571	-0.704586	-2.55207	-0.552074	1.99327	2.06391	2.57205	2.2681	1.8635	0.751793	1.04784	1.96362
ENSMUSG00000026535.9	Ifi202b	N/A		1.22617	1.7953	2.16336	2.2849	1.40112	1.1903	2.02142	2.05792	-0.725444	0.846774	-0.680336	-0.0392303	-0.474515	0.165883	0.184734	0.271643	-2.76794	-0.836171	-4.16576	-1.38615	-1.37861	-0.442875	-1.47274	-1.23976
ENSMUSG00000070942.8	Il1rl2	N/A		0.811353	1.42141	-0.06445	0.29812	1.20728	1.37078	1.1282	-0.06445	2.34479	1.08699	0.713158	1.1282	1.77288	1.31831	0.93555	1.52051	-3.29907	-3.29907	-1.28684	-2.7343	-3.29907	-1.43657	-0.286842	-1.28684
ENSMUSG00000040957.15	Cables1	N/A		1.7056	2.27496	2.49795	2.20844	1.92132	1.92132	1.80405	2.07414	-0.926673	-0.663638	1.24015	-0.961486	1.39526	-0.078676	-0.476059	0.886511	-3.1111	-1.66364	-3.14591	-3.14591	0.336362	-3.1111	-2.28341	-0.698451
ENSMUSG00000028476.13	Reck	N/A		-0.626106	-1.4886	-1.6762	0.186294	-0.626106	-1.4886	-1.6762	-1.6762	-1.4886	-0.626106	-1.6762	0.993649	-1.4886	-1.4886	-1.6762	-1.6762	2.83333	2.83333	4.01918	1.50822	0.958857	2.69582	2.35622	0.993649
ENSMUSG00000106609.1	RP23-336O18.3	N/A		-0.902976	-3.0874	-3.60589	-3.60589	-3.0874	-0.902976	-2.74339	-1.74339	-0.417549	-1.2249	0.344069	1.1635	0.582451	2.0605	-0.283962	1.98453	0.681987	0.775096	1.11459	2.48542	2.84119	2.68199	2.38589	2.50453
ENSMUSG00000039167.11	Adgrl4	N/A		1.60683	1.06626	1.59676	3.07069	2.73611	1.51372	1.12727	2.33372	0.191792	0.60683	-1.57317	0.886264	1.69429	-0.39317	1.42683	-0.573168	-2.25567	-2.25567	-2.43566	-2.43566	-2.25567	-2.25567	-2.43566	-0.988205
ENSMUSG00000097113.7	RP23-302C16.2	N/A		-1.64564	-1.64564	0.447886	-2.459	-2.50813	-0.0606749	-2.459	-3.3215	-0.645638	-0.645638	0.125958	-0.874042	-1.64564	-0.645638	0.540996	-1.13708	3.26125	3.0548	3.12596	2.32236	1.52429	1.60229	1.89855	1.78892
ENSMUSG00000056258.9	Kcnq3	N/A		1.77322	2.19643	1.82538	1.44104	2.18416	1.44307	1.11911	1.17496	1.06868	0.671344	0.871182	-0.7365	1.37988	0.121147	0.62607	1.04111	-1.10125	-3.68621	-1.95889	-1.66939	-2.36428	-3.68621	-0.605256	-3.12882
ENSMUSG00000001761.7	Smo	N/A		0.812571	2.21856	2.45901	1.79343	2.19108	2.1345	1.71681	2.31049	-0.0499258	-0.0499258	1.25738	-0.894627	-0.339432	0.660568	0.935448	0.635887	-1.18743	-3.37185	-3.92705	-2.47959	-0.509357	-2.50936	-3.06455	-0.742624
ENSMUSG00000074476.6	Spc24	N/A		-1.42013	-0.74206	-2.88618	-2.88618	-1.74206	-2.74206	-2.88618	-2.02369	2.44776	1.6842	0.783667	2.06378	1.7815	1.71737	1.97631	2.1056	-0.572135	1.16483	0.676752	1.7312	0.164831	-1.74206	0.561275	0.783667
ENSMUSG00000085501.1	RP23-296K20.1	N/A		2.3896	2.50824	1.78963	2.86763	1.84528	2.5271	1.8161	1.35667	-0.154724	0.845276	0.842097	-0.264819	-0.569761	-0.154724	0.789629	-1.3803	-2.73969	-3.60218	-1.64333	-1.96526	-0.739686	-2.15472	-0.380296	-3.82775
ENSMUSG00000052302.6	Tbc1d30	N/A		-0.520369	-1.23658	-1.5214	-0.457273	-0.584499	-1.45897	-1.07394	-2.98083	-1.04393	0.0435324	0.106628	-0.026639	-1.722	-0.722003	0.376717	-1.98083	1.77625	2.22286	2.28595	2.45379	1.75049	1.49523	1.32295	1.4949
ENSMUSG00000062372.13	Otof	N/A		1.74978	1.46967	1.36181	1.96846	2.12175	1.24728	1.36181	1.60281	0.247279	-0.167758	-0.0101624	-0.0976253	0.662317	0.469672	0.361806	-1.09763	-3.33768	-2.01576	-3.96012	-1.29027	-0.430793	-2.01576	-0.0101624	-0.190735
ENSMUSG00000047037.5	Nipa1	N/A		-2.72191	-1.39998	0.0888784	-3.68051	-1.72191	-0.914553	-1.81801	-1.01066	-0.136945	0.184983	-1.81801	0.0888784	-2.72191	-1.39998	-1.23305	-0.117573	2.84795	2.56349	2.85441	2.22638	2.32249	3.09827	1.98934	2.42992
ENSMUSG00000030465.19	Psd3	N/A		0.27762	1.02128	2.19951	1.31289	0.495212	0.632715	0.769273	1.01591	-0.290664	-1.24175	-0.589808	-1.79144	-0.393757	-0.393757	-0.528408	-0.865442	-2.82672	-0.448205	-2.30602	-3.11337	1.87372	1.2943	1.55906	2.33784
ENSMUSG00000106671.1	RP24-357G2.2	N/A		-1.00275	-0.00275278	-0.127055	0.573385	1.21964	-2.45021	-1.12706	-2.12706	-1.00275	-2.45021	-0.127055	-2.98955	-2.45021	-1.58772	-2.12706	-2.98955	3.54157	2.49975	3.06277	2.75559	2.36648	1.31918	2.5168	2.70583
ENSMUSG00000101823.1	RP24-416M6.1	N/A		-0.6674	-2.92374	-1.81458	-3.03698	-0.0492706	-1.0062	-1.62194	-0.577544	-0.00620174	-0.771737	0.527809	-0.336536	0.210116	-0.701347	-0.412485	-0.534475	1.97242	1.41413	1.92496	1.35534	1.8547	0.67452	2.45488	2.07155
ENSMUSG00000085126.1	RP23-342H16.1	N/A		-0.826815	-1.24185	0.0301604	-0.204305	0.173185	-1.82682	-1.96984	-1.7068	0.34311	-0.826815	-0.204305	0.0301604	-1.82682	-2.68931	-1.12184	-0.706805	2.78789	2.30247	1.63897	1.93705	1.75815	1.87362	1.61512	0.662428
ENSMUSG00000038235.4	F11r	N/A		-1.76557	-3.19853	-2.49708	-3.55597	-3.35053	-3.19853	-1.97101	-2.09654	2.51572	1.05697	1.42131	1.80743	2.36219	2.1089	1.12116	1.20336	2.22774	-1.9355	1.61729	1.13519	2.06826	1.1089	0.972807	0.842058
ENSMUSG00000109572.1	Cfap99	N/A		3.73534	3.39204	2.62415	2.99188	3.57387	3.61135	3.17775	2.5526	0.133301	-1.08909	1.47731	-3.19254	-0.674053	-2.53655	1.47731	-1.00812	-2.53655	-2.53655	-3.19254	-3.19254	-2.53655	-2.53655	-0.522692	-3.19254
ENSMUSG00000029761.16	Cald1	N/A		-3.73335	-3.73335	-3.84622	-1.17637	-0.285892	-3.73335	-1.98373	-3.84622	0.987127	1.55541	0.539836	1.77116	2.05988	1.71411	0.66013	1.77116	0.299071	1.03604	0.539836	2.14556	1.55541	2.27889	1.60124	1.82363
ENSMUSG00000023505.13	Cdca3	N/A		-4.38428	-0.434322	-1.61485	-2.12942	-0.35186	-0.614895	-0.614845	-0.766848	2.61777	2.76362	1.47262	2.20278	2.06318	2.0328	1.53896	2.41195	-1.35186	-1.93682	-0.181886	-0.936773	-0.273858	-0.129467	-0.766848	-0.614845
ENSMUSG00000070858.12	AC163329.3	N/A		2.02598	2.57852	1.82969	1.16033	2.76295	2.5565	1.29309	2.05208	-1.14394	-0.00644088	-0.691144	-1.21471	-0.658518	0.704053	0.244726	-0.629744	-2.46587	-3.32837	-0.26051	-1.75527	-1.88091	-1.14394	-0.514266	-1.51427
ENSMUSG00000041754.5	Trem3	N/A		-1.61557	-1.23706	-0.183928	-1.59897	-1.9375	-2.13015	-1.18393	-4.18393	-0.237063	0.384426	0.370661	1.138	0.149961	0.488762	0.242337	0.860466	1.80396	2.31043	1.51651	1.32387	0.869852	1.14996	0.83844	0.860466
ENSMUSG00000062488.9	Ifit3b	N/A		3.28344	3.18063	2.80484	2.99852	3.19287	3.73522	2.13008	2.86572	-2.10888	0.554087	-0.28055	-2.83075	-3.69384	-2.10888	0.219879	-0.428649	-1.81937	-0.371912	-1.93766	-1.55064	-2.47145	-1.37191	-2.05314	-1.93766
ENSMUSG00000013089.15	Etv5	N/A		-1.02932	-1.72976	-0.174867	-0.470323	-0.407829	0.0251307	-0.607827	-2.1224	-0.729757	-1.14479	-1.34479	-1.60783	-2.72976	-1.14479	-0.607827	-0.229315	1.8401	1.7621	1.47964	2.10367	2.59217	2.69651	1.75675	1.82513
ENSMUSG00000105987.4	RP23-110C17.2	N/A		-0.712568	-0.792738	0.0404291	-1.10843	-0.752096	-0.674094	-1.54453	-1.82464	2.54965	2.52506	1.18818	2.52788	2.00872	2.31638	1.93786	2.35669	-3.60009	-2.92202	-0.0172863	-3.04703	-0.194101	0.247904	0.537929	-1.04703
ENSMUSG00000022018.7	Rgcc	N/A		0.991227	0.884311	-0.988427	0.696072	0.991227	0.808362	0.758807	1.03711	0.242765	0.242765	0.818928	1.1815	1.32683	1.02517	0.66365	0.72778	-2.40109	-4.26359	-2.79578	-1.79578	0.553105	-0.401091	-0.151926	-0.151926
ENSMUSG00000019874.11	Fabp7	N/A		-2.02972	-3.02972	-1.17926	-1.83133	-1.61468	-0.707792	-2.63869	-1.17926	0.514601	1.49384	1.06175	1.00517	1.00003	1.47278	1.31551	1.57077	-0.707792	0.707246	-0.638689	0.976021	1.63325	1.26796	0.448774	1.08923
ENSMUSG00000071724.5	Smpd5	N/A		-2.79573	-1.93323	-1.97426	-1.97426	-2.79573	-2.79573	-1.97426	-1.97426	0.651734	-0.125874	-1.97426	1.34767	-1.34827	0.236696	-1.97426	0.888238	2.79469	3.37055	3.53209	2.13617	2.35217	2.3887	0.695593	3.24579
ENSMUSG00000030711.15	Sult1a1	N/A		1.75377	1.79958	1.27537	1.39566	2.5275	3.22584	0.921732	1.7962	-2.20042	0.25901	0.144125	-0.248193	-0.0304966	-1.20042	0.211238	-0.248193	-3.06292	-3.06292	-2.66323	-4.11069	0.606933	-0.615459	1.77417	-0.248193
ENSMUSG00000081078.1	RP23-370F7.3	N/A		-0.730316	-0.585926	-0.22276	-1.6378	-0.730316	-2.97824	-1.22276	-1.22276	0.414074	0.414074	0.0991688	-0.720259	-0.656316	-0.656316	-0.485794	-2.22276	2.59161	2.30716	2.87878	2.4211	0.379308	0.231209	1.3622	0.973638
ENSMUSG00000050050.17	Ccdc158	N/A		1.70991	2.68189	1.81359	1.56566	1.17939	0.916358	1.65312	0.2661	-1.40557	-1.40557	-1.11241	0.0250919	-2.85303	-0.990533	-2.43434	-3.29684	0.816822	1.3314	0.56566	1.65312	0.00946736	-1.99053	-0.43434	-0.264415
ENSMUSG00000035835.14	Plppr3	N/A		1.12691	1.3493	0.760909	0.651975	0.577571	1.48681	1.14947	-0.213096	2.73572	1.94794	1.35459	2.1293	2.25344	2.1973	1.73444	1.16937	-4.64248	-4.64248	-0.932988	-3.43549	-3.19502	-1.19502	-0.932988	-3.43549
ENSMUSG00000092051.2	RP23-269H11.2	N/A		2.14382	1.99035	1.5376	1.95263	2.22113	1.157	1.6751	1.20056	-0.624362	-0.454436	0.358625	-1.28183	-0.376434	-0.817007	-1.19937	-2.3693	-0.624362	-0.536899	0.561442	-0.281832	-2.62436	-1.45444	-1.3693	-0.784333
ENSMUSG00000020377.15	Ltc4s	N/A		-2.62569	-2.62569	-1.14964	-3.81949	-2.62569	0.044162	-3.81949	-1.14964	-2.62569	-0.17823	0.04301	-1.37203	0.406732	0.236807	1.71544	1.0874	0.044162	1.40673	0.627972	-0.787065	4.72062	3.82177	4.67963	3.94388
ENSMUSG00000020108.4	Ddit4	N/A		-0.480286	-0.833923	-1.32182	-0.638005	-0.965713	-1.60175	-1.76788	-2.35285	-1.38494	-0.471353	-0.0184283	0.837837	0.0956883	-1.00385	-0.36071	-1.24705	1.51073	1.60243	1.71043	2.73462	2.19442	1.33854	1.17616	1.24771
ENSMUSG00000014599.10	Csf1	N/A		1.85894	2.11387	1.82232	1.58852	1.83448	1.74548	1.98338	1.67912	-2.71395	0.212047	0.0815582	-0.844441	-0.787953	-0.228526	-0.121975	0.388219	-1.57645	-0.948418	-1.99644	-1.70694	-0.643563	-0.865955	-1.70694	-1.16637
ENSMUSG00000020773.11	Trim47	N/A		-2.21537	-0.537301	-3.77021	-1.52228	-0.537301	-1.5373	-0.77021	-0.215621	-1.26428	-0.314909	-0.1555	-0.215621	0.181518	0.672153	0.317253	0.477718	-0.23962	0.564238	0.721643	0.112433	2.60225	2.62593	2.47772	2.54267
ENSMUSG00000020620.14	Abca8b	N/A		1.71433	2.25865	1.24532	1.98228	2.6051	2.65293	0.611445	1.70766	0.936719	1.03625	1.50835	0.611445	0.829803	0.714326	-0.546096	0.277026	-3.73313	-3.73313	-1.92461	-4.10903	-1.54871	-3.73313	0.0753922	-1.43918
ENSMUSG00000012017.3	Scarf2	N/A		-0.74363	-0.00666451	-1.49831	-0.498309	-1.32859	-2.19109	-0.498309	0.823619	-2.19109	-1.32859	-1.49831	-2.94577	-2.19109	-2.19109	-0.275917	-1.08327	3.84133	3.90023	2.74962	2.56058	2.67141	1.75887	0.724083	1.44029
ENSMUSG00000018417.14	Myo1b	N/A		-0.345931	-2.20843	-1.64146	-1.64146	-2.20843	-2.20843	-1.64146	-1.64146	-2.20843	-2.20843	-1.64146	1.22103	-2.20843	-0.024003	-1.64146	-1.64146	3.48696	2.56096	1.02839	3.50644	3.56096	4.01162	2.46896	3.26543
ENSMUSG00000027863.8	Cd2	N/A		0.268436	0.380082	-1.18109	-0.69566	-0.220311	-0.24377	0.918449	-0.201845	1.43282	1.58038	1.41755	1.75572	1.89158	1.2767	1.31168	1.73948	-1.58954	-2.71508	-0.60993	-2.40348	-1.53065	-0.530651	-1.06244	-0.988441
ENSMUSG00000045092.8	S1pr1	N/A		-1.11911	-1.31176	-1.83179	-0.509866	-1.31176	-1.53415	-2.83179	-3.69429	-0.797185	-0.534151	-0.131355	0.97556	0.738867	0.273204	1.0751	-0.0244396	0.404449	-0.0316505	1.62764	0.868645	2.43548	2.78778	2.09894	2.37766
ENSMUSG00000026815.14	Gfi1b	N/A		-3.54567	-2.09821	-2.55285	-4.41535	-0.361245	-1.36125	-1.96789	-2.23093	0.316827	0.404289	-0.0292912	0.873412	-2.68317	-1.36125	1.53461	-0.160535	2.14972	2.44611	1.53461	2.17507	3.16232	2.93154	3.11957	2.11957
ENSMUSG00000021822.3	Plau	N/A		1.31031	1.13894	1.48628	1.34673	1.23934	2.18373	0.976082	1.5464	0.611313	0.736844	0.369093	0.15408	0.125886	0.151881	1.30092	0.346725	-4.07051	-1.84812	-1.33135	-4.06831	-1.01162	-0.56801	-0.795294	-1.33135
ENSMUSG00000038143.16	Stox2	N/A		1.48133	0.305482	0.856788	1.46447	0.97686	1.35795	1.48684	0.988032	0.760048	1.13556	1.27182	0.988032	2.27852	1.45749	0.634396	0.322451	-4.3119	-2.86444	-1.72817	-1.53553	-1.12748	-1.44941	-2.2136	-2.53553
ENSMUSG00000040204.6	Pclaf	N/A		-2.58988	-2.58988	-2.41258	-2.41258	-2.58988	0.079972	-2.41258	-2.41258	2.76447	3.0275	2.09378	2.49431	1.85758	2.0275	2.44992	1.69785	0.079972	-2.58988	0.257274	-2.41258	0.442542	0.079972	1.44992	1.61984
ENSMUSG00000046352.7	Gjb2	N/A		0.729562	0.647099	0.432454	0.316977	-0.633009	-1.8554	-3.13048	-0.946058	-0.440364	-0.118436	0.191446	-0.946058	-3.30286	-1.8554	-1.26799	-3.13048	2.62573	3.18899	2.53937	3.30187	-0.633009	1.6471	0.819477	1.81948
ENSMUSG00000021508.11	Cxcl14	N/A		-1.66203	-1.66203	-1.48792	-1.48792	-1.66203	-1.66203	-1.48792	-1.48792	-1.66203	-1.66203	-0.0404584	-0.625421	-1.66203	-0.799537	-1.48792	-0.625421	3.20046	2.59278	0.696507	3.18193	3.48587	3.15466	0.696507	4.15594
ENSMUSG00000021879.13	Dnah12	N/A		-0.383025	-0.541723	-1.01615	-0.34372	-0.353278	-3.16063	-5.87864	-0.971751	-1.0611	-1.96799	-0.84622	-1.55671	-3.64606	-2.38302	-0.658593	-2.69422	3.86015	3.65589	3.95396	4.2006	3.08458	2.8962	2.77502	3.03642
ENSMUSG00000036896.5	C1qc	N/A		-0.0845037	-3.64744	-3.38766	-1.52516	-0.199981	-3.64744	-1.52516	-2.52516	-1.46302	-0.784943	-3.38766	-0.525161	-0.977588	0.215057	-0.525161	0.644764	-0.199981	1.46298	0.796767	1.1187	4.71091	4.61594	5.21631	5.62459
ENSMUSG00000020330.16	Hmmr	N/A		-2.2473	-2.2473	-2.53825	-1.67575	-2.2473	0.615196	0.494173	-0.675752	3.07463	3.52209	1.57218	3.05217	0.937124	2.82465	1.9681	2.78368	-2.2473	-1.3848	-2.53825	-1.67575	-1.3848	0.785121	-0.675752	-0.0907898
ENSMUSG00000073722.3	RP24-338N17.1	N/A		-2.24132	-2.24132	-1.77902	-1.77902	-2.24132	-2.24132	-1.77902	-1.77902	-0.378826	-0.378826	-1.77902	1.2534	-0.793864	1.70864	1.08348	0.0834761	1.20614	0.206136	-1.77902	0.890831	3.70864	3.68726	3.60704	3.7559
ENSMUSG00000110397.1	RP23-466C10.2	N/A		2.15901	2.40517	1.52138	1.45336	1.9422	2.15901	1.30687	1.55885	-0.945324	-0.459897	-0.11184	-2.55662	-1.94532	-2.94532	-2.55662	-2.72655	0.376604	1.15901	0.732882	1.18034	-2.09733	-1.80782	-0.141587	0.33954
ENSMUSG00000027030.15	Stk39	N/A		0.955414	-0.0445864	-0.356865	-0.508868	-0.334093	-1.18209	-2.67879	1.07609	-3.36651	-0.334093	-0.871438	-2.67879	-3.36651	-3.36651	-2.67879	-2.09383	3.40287	3.46177	3.2281	2.92112	1.30334	2.87102	2.34358	2.29849
ENSMUSG00000071847.12	Apcdd1	N/A		-0.247805	0.211627	-0.335452	-0.95694	-1.07788	-0.547365	0.097508	-0.265062	2.67106	1.94202	1.53244	2.13704	2.59768	2.21163	2.09751	2.34262	-1.66284	-4.1103	-4.51988	-1.07242	-0.547365	-1.44045	-0.569917	-0.487454
ENSMUSG00000047462.9	RP23-182K18.1	N/A		1.02698	1.26305	2.25814	1.08821	0.342485	1.26305	1.67317	1.59071	0.579525	0.622593	0.825176	0.0882101	0.442021	0.120093	1.41014	0.503247	-0.0725517	-0.657515	-2.35925	-2.35925	-2.46487	-2.46487	-2.35925	-2.35925
ENSMUSG00000035783.8	Acta2	N/A		0.272482	0.608085	1.0719	-0.00287199	0.403727	1.08962	0.709326	0.396735	1.52402	1.14695	1.33736	1.11496	2.08962	1.68752	1.56148	1.78239	-4.11984	-2.79791	-0.913605	-3.55746	-0.871908	-1.03237	-0.750106	-2.75011
ENSMUSG00000031443.7	F7	N/A		-2.04459	-2.04459	-2.08802	-0.194931	-1.8222	-1.8222	-0.435939	-1.08802	2.38168	1.82988	1.54757	2.127	2.728	2.26527	0.96261	2.14902	0.324645	-1.04459	-0.647443	-0.807908	0.177804	-0.929112	-1.08802	-0.435939
ENSMUSG00000070305.10	Mpzl3	N/A		-1.20541	-2.07416	-0.725037	-2.388	-0.983015	-2.07416	-1.4494	-3.388	0.777314	0.500307	0.713536	0.957772	0.650203	1.05333	0.330816	0.96955	0.828539	1.08176	1.44489	1.61949	1.00961	0.435698	0.727475	1.18691
ENSMUSG00000059606.3	Rnase2b	N/A		1.55736	-0.027602	1.54718	1.68148	0.387435	0.55736	0.0965195	1.09652	1.29433	0.846867	1.54718	1.58195	1.77975	1.19479	1.83348	1.74422	-2.47506	-2.47506	-3.67287	-3.67287	-1.61256	-1.0276	-3.67287	-0.109931
ENSMUSG00000066677.12	Ifi208	N/A		3.74598	3.63807	3.71736	3.00234	3.50616	4.87043	1.18131	1.36188	-1.46347	-0.463471	-0.725584	-0.725584	-0.726505	-1.46347	-1.72558	0.733848	-2.91093	-2.91093	-2.58808	-2.58808	-2.91093	-2.91093	-1.72558	0.0817709
ENSMUSG00000105062.1	RP23-114F4.3	N/A		-0.703478	0.296522	-1.70122	-0.893869	-0.218051	-1.02541	-0.000784397	-0.893869	-1.02541	-0.440443	-0.701224	0.106131	-1.44044	-2.02541	-2.70122	-1.3793	2.83257	2.43403	2.10613	1.82234	0.434026	0.881485	2.08014	2.15676
ENSMUSG00000039239.14	Tgfb2	N/A		2.01193	2.48142	3.08559	1.65675	3.75444	1.48142	2.76367	2.76367	-1.10354	-2.551	-0.458726	-1.90618	-2.551	-2.551	-1.90618	-1.90618	-2.551	0.311495	-1.90618	-1.90618	0.633423	0.633423	-1.04369	0.763666
ENSMUSG00000017716.15	Birc5	N/A		-0.542316	-1.95735	-1.06198	-2.06198	-1.22039	-1.54232	-2.92448	-0.0619824	2.26504	2.60743	2.0673	2.84491	1.98125	2.1856	2.10794	2.22342	-1.54232	-0.957353	-2.92448	-2.06198	-0.542316	-0.734961	0.52298	1.33034
ENSMUSG00000036905.8	C1qb	N/A		-1.28594	-5.05533	-1.4072	-1.93076	-0.944901	-0.669267	-1.2869	-3.1234	-1.19283	0.233436	-1.1234	-0.345796	-0.548973	-1.10537	0.373023	-0.258333	0.016624	1.4796	0.069242	0.461559	4.7305	4.34245	4.28235	4.28962
ENSMUSG00000047747.10	Rnf150	N/A		1.86528	2.31754	1.26262	1.50721	1.88158	1.7634	1.06331	1.57351	-0.229579	-0.331118	-0.596416	-1.19681	-0.687261	-0.807556	-1.22027	-1.24411	-2.52376	-2.33112	-0.396117	-1.98108	-0.630678	-0.286723	0.978278	0.249875
ENSMUSG00000070501.14	Ifi214	N/A		2.04153	2.16929	2.74324	3.00021	1.98708	1.53457	2.47475	2.78791	-0.654462	1.52186	-0.110212	-0.662753	-0.344122	0.316391	-1.11021	-0.321716	-2.49096	-1.97639	-4.43214	-1.39972	-2.71336	-1.39143	-1.98468	-0.984681
ENSMUSG00000046826.7	Fam187b	N/A		0.961534	0.905681	1.10575	0.546327	1.14961	0.702147	1.44815	1.5838	1.01531	0.439113	0.655951	0.385862	1.49064	1.24272	0.942255	0.655951	-1.88282	-3.75728	-1.53168	-4.5641	-1.09432	-1.17232	-0.614138	-0.614138
ENSMUSG00000107215.1	RP23-253G12.9	N/A		1.82258	1.6028	1.82055	0.911519	1.58443	1.19788	1.50713	1.95105	-0.826508	-0.116014	0.667593	-1.49287	-0.403296	-0.30866	-0.258406	-0.53594	-1.96401	-1.19848	-2.41041	-1.87989	-0.859675	-0.531052	0.442034	-0.722353
ENSMUSG00000020175.14	Rab36	N/A		1.1335	0.833679	0.963418	0.857586	0.524351	0.248716	0.667643	0.517559	1.86704	1.60318	1.62601	0.977426	1.53736	0.951102	0.949275	0.913295	-2.02958	-1.14123	-0.30667	-3.46813	-2.33625	-3.19186	-1.56631	-2.1311
ENSMUSG00000026482.13	Rgl1	N/A		-0.0868373	0.18817	-0.0818353	0.0477996	0.0506663	0.600223	0.305187	-0.367238	-1.8238	-0.560768	-0.559883	-2.9522	-2.08684	-2.14573	-0.864738	-1.27978	0.962794	0.720518	0.378716	0.579181	1.9523	2.22931	2.51337	2.28142
ENSMUSG00000089929.1	Bcl2a1b	N/A		-0.883564	-1.41408	-0.314633	-2.63656	-0.776649	-0.999041	-3.49906	-1.0516	-2.584	-1.12457	-1.63656	-0.0515981	-1.12457	-4.4465	-1.0516	-3.49906	3.90384	3.42162	2.97815	4.12499	3.14392	2.8836	3.1448	3.49272
ENSMUSG00000095930.1	Nim1k	N/A		-0.285328	1.17035	0.190357	0.283466	0.870791	0.285828	0.955892	0.0735431	1.5279	1.46803	0.785967	0.993124	1.75531	1.61881	0.796536	1.16611	-3.82965	-3.41461	-1.13157	-3.13157	-0.659724	-0.50772	-0.172213	-0.809643
ENSMUSG00000090386.9	Mir99ahg	N/A		1.05343	1.42267	2.68454	2.94757	1.7904	1.37536	2.54703	-0.0968235	1.27582	0.37536	0.990639	1.60362	-0.0720987	1.59775	0.225105	0.0731015	-3.39403	-1.53153	-2.95932	-2.95932	-1.94657	-1.94657	-2.95932	-2.09682
ENSMUSG00000021759.14	Plpp1	N/A		-0.39478	-2.25728	-2.27682	-2.27682	-2.25728	-0.39478	-2.27682	-1.41433	-0.39478	-0.39478	-0.829364	0.393028	-1.39478	-0.809818	-0.414327	-0.829364	3.5825	1.30566	2.34056	3.07753	1.99754	1.41257	1.8336	2.67314
ENSMUSG00000103348.1	RP23-395G18.1	N/A		-1.36409	-1.77913	-3.43131	-1.56881	-2.36409	-3.22659	-3.43131	-0.761458	1.15947	-0.042166	0.338078	-1.24688	-1.04217	-1.36409	-0.568813	-3.43131	4.3841	3.35015	4.0894	4.55013	1.84536	0.443261	2.43119	3.0311
ENSMUSG00000065905.1	Gm26110	N/A		-2.24529	-2.24529	-1.09386	-1.09386	-1.24529	-1.24529	-1.09386	-1.09386	-0.923359	-0.923359	-0.231359	-0.231359	-2.24529	-0.923359	-1.09386	-1.09386	3.48263	2.92464	1.09057	2.93857	3.62508	1.96417	2.22807	0.768641
ENSMUSG00000027715.9	Ccna2	N/A		-2.60125	-2.60125	-2.82133	-0.636909	-2.60125	-2.60125	-1.95884	-2.82133	3.76904	3.81584	1.36309	2.71359	2.84621	3.28362	1.62613	2.04116	-1.73875	-2.60125	-2.82133	0.363091	0.961688	0.0686028	1.7416	1.21109
ENSMUSG00000030208.15	Emp1	N/A		-1.34444	-0.259548	-0.511256	-1.01376	0.225879	-0.0669026	0.0218673	-0.52833	1.38596	1.72491	0.943539	1.26918	1.87796	2.01631	1.15617	1.35548	-3.80387	-2.30137	-0.898279	-2.83318	0.165758	0.379354	0.730404	0.308172
ENSMUSG00000041287.5	Sox15	N/A		-0.909952	-1.32499	-3.27196	-1.40946	-0.909952	-0.909952	-0.239539	-3.27196	-0.909952	0.259973	0.497427	0.590536	-1.32499	-2.77245	-2.40946	-1.40946	2.92294	3.2398	3.19045	3.38495	1.54948	1.09005	2.23439	2.1141
ENSMUSG00000031825.16	Crispld2	N/A		-0.996808	-2.44427	1.19906	-2.36388	-2.44427	-1.58177	-2.36388	-2.36388	3.98809	2.06209	2.54301	4.3566	3.14615	3.56798	2.95805	2.82055	-2.44427	-2.44427	-2.36388	-2.36388	-0.996808	0.588155	0.305976	-2.36388
ENSMUSG00000014361.5	Mertk	N/A		-0.98174	-1.36025	-0.376935	-0.698863	-1.22275	-0.775289	-0.791972	-0.791972	-0.874825	-0.0972171	-0.891508	0.0560246	0.125175	0.447104	0.3886	0.471062	-1.87482	-0.512254	-3.1139	0.00157642	3.87241	3.25446	2.92319	2.8247
ENSMUSG00000039304.11	Tnfsf10	N/A		1.6711	2.15897	1.77252	1.76111	1.9497	2.07112	1.72635	1.53872	-1.48185	-0.337458	-1.21617	-2.6312	-2.72978	-1.20621	-0.515726	-1.21617	-0.270344	0.419971	0.0692372	-0.358184	-0.974888	-1.27034	-0.358184	-0.572309
ENSMUSG00000040809.10	Chil3	N/A		-1.49094	-1.25223	-0.589696	-0.571861	-0.713689	-0.507348	-2.43339	-1.30509	0.836084	1.20983	1.61827	2.22669	1.62421	2.01043	2.03944	2.1931	-1.09734	-1.40958	-0.636502	-1.26347	0.287552	0.503016	-0.60533	-0.672157
ENSMUSG00000107352.1	RP24-80F7.3	N/A		1.14933	1.0696	2.55148	1.68533	1.0696	1.14933	1.18891	1.96652	1.25402	0.254024	0.425947	0.0819926	1.01956	0.780093	0.807818	1.13644	-2.0679	-1.48294	-3.03348	-4.48094	-2.38983	-1.80487	-1.29652	-1.03348
ENSMUSG00000066510.5	Ankdd1a	N/A		-2.43817	0.0092895	-2.15661	-2.15661	-0.990711	-2.43817	-2.15661	-2.15661	-0.990711	0.0092895	0.0278113	0.875808	-0.990711	-0.990711	-0.709154	-2.15661	3.51179	1.51179	3.19774	2.34974	2.12477	1.67225	2.16531	2.87581
ENSMUSG00000086012.2	RP24-497G20.1	N/A		1.58717	2.14176	1.75571	1.01305	1.28761	0.804404	1.60276	0.212816	1.02013	0.219441	1.16219	-0.0602021	0.414992	0.894602	-0.287612	0.082756	-2.9274	-3.73476	-1.73827	-2.47524	-0.9274	-0.780559	-1.32324	0.055275
ENSMUSG00000045328.11	Cenpe	N/A		-1.01704	-1.07362	-1.73366	-1.44415	-1.19392	-1.63002	-0.618182	-1.1487	2.54461	2.26551	1.27632	1.63557	1.55864	1.79822	1.02715	1.3538	-0.469552	-1.91012	-0.175663	-1.09623	-0.910125	0.0374079	0.14081	0.782917
ENSMUSG00000008734.9	Gprc5b	N/A		1.32105	0.757145	0.953961	0.32593	0.443037	0.818546	1.11443	0.773389	0.443037	1.14047	1.39006	1.99578	1.23358	2.07907	1.82069	1.1519	-2.76642	-1.06598	-0.433062	-2.54854	-1.95906	-2.44449	-3.996	-2.54854
ENSMUSG00000040152.8	Thbs1	N/A		0.53154	1.5963	1.36791	1.90578	1.56104	1.63258	1.01763	0.673254	-0.467135	-0.0395794	1.00456	1.68654	1.92858	1.87059	0.91924	1.35767	-4.03369	-3.94254	-3.61724	-2.17144	-0.318844	-0.318844	-2.3053	-1.8386
ENSMUSG00000060594.6	Layn	N/A		1.83484	2.17405	1.22453	1.35645	1.60955	1.39054	1.57684	1.41141	1.13223	0.852123	0.799229	0.342371	0.589088	0.589088	1.41141	1.1618	-4.40269	-4.40269	-1.74509	-2.5227	-0.73284	-0.633304	-2.00813	-3.00813
ENSMUSG00000078202.3	Nrarp	N/A		1.04517	1.04517	0.589474	-0.995489	-0.598688	-3.46118	-1.21788	-3.66534	-1.59869	-1.27676	-1.80284	-0.995489	-3.46118	-1.59869	-1.48092	-1.48092	3.63972	3.44571	3.19716	3.43556	1.61077	1.20867	1.8976	2.51908
ENSMUSG00000038236.8	Hoxa7	N/A		-3.82228	-3.82228	-3.45475	-3.45475	-0.500353	-1.63786	-3.45475	-1.27033	2.74066	1.46648	0.867178	1.86718	2.38007	1.65493	1.0516	2.38503	0.288143	-0.500353	1.45214	-0.784899	1.12768	0.625178	2.83401	1.96234
ENSMUSG00000029816.10	Gpnmb	N/A		-0.608998	-1.87203	-0.927962	-0.190996	-0.872032	-4.05646	-3.37542	-3.37542	3.06343	2.40595	2.31997	4.09441	3.08216	2.3296	2.07204	3.4983	-1.38661	-1.87203	-3.37542	-0.342999	-0.106497	-0.106497	-0.0534928	-0.342999
ENSMUSG00000064267.13	Hvcn1	N/A		1.80622	1.80622	0.644351	0.86008	1.16879	1.40096	0.798679	1.09955	1.58383	1.27897	0.620892	0.523045	1.14571	0.998865	1.73455	0.620892	-4.67099	-2.48656	-2.13992	-1.98792	-2.22353	-1.80849	-0.786283	-1.98792
ENSMUSG00000020961.15	Ston2	N/A		-0.48208	-1.70447	-0.12297	-0.0751414	0.411005	-0.678	-0.691813	-1.5987	-1.65201	-1.06704	-2.5987	-1.38925	-2.21143	-1.8744	-0.15576	-2.5987	2.76946	2.58776	2.05951	2.75444	2.0798	1.82141	2.56872	1.84838
ENSMUSG00000027221.5	Chst1	N/A		1.36191	1.36191	1.30089	0.878204	1.20144	1.28391	0.74988	1.27781	0.506299	0.66857	0.878204	0.908577	0.361909	-0.131131	0.323615	0.99604	-2.56409	-1.56409	-3.09142	-1.67638	-2.30106	-0.185579	-1.67638	-0.86903
ENSMUSG00000060512.7	RP23-192C21.1	N/A		0.541967	0.769773	0.744377	1.08833	0.316407	1.49371	1.2766	0.809472	0.651591	0.863895	0.820041	1.08833	0.615967	1.63389	0.336719	1.02579	-2.89861	-1.70596	-2.69303	-1.3711	-1.89861	-0.384033	-1.75443	-1.3711
ENSMUSG00000009633.3	G0s2	N/A		-0.443425	-0.917356	-1.65928	-1.01773	-1.18039	-4.94978	-2.71817	-1.98121	-0.627849	0.234647	-0.258739	0.57951	-1.62785	-0.839353	-0.303133	-1.91082	2.82561	3.09263	2.57951	3.14601	2.10254	2.33057	1.52976	2.01428
ENSMUSG00000038587.9	Akap12	N/A		-1.14192	-1.58553	-0.690963	-1.44432	-2.22938	-2.64442	-3.40368	-6.4361	-0.737531	1.11047	0.448761	1.20775	-2.52894	-2.64442	-0.383782	-0.551239	3.72044	3.56828	3.5736	2.99245	2.65936	2.45361	2.34526	2.34227
ENSMUSG00000020641.16	Rsad2	N/A		2.46451	2.4506	1.84836	2.16184	2.64635	2.55396	1.54733	2.44981	-2.55095	0.417615	-1.06621	-1.66567	-1.73651	-1.68101	-0.65478	-0.852082	-1.08701	-0.0870056	-1.31775	-0.42466	-1.65405	-1.73651	-1.1865	-0.839697
ENSMUSG00000036111.8	Lmo1	N/A		0.695416	1.46865	1.846	0.71594	0.468645	1.75955	1.27342	1.32787	0.914056	0.868252	0.447451	0.688459	0.437618	1.23598	1.15794	1.01039	-2.76402	-2.76402	-3.42702	-4.87448	-1.62651	-0.693626	0.846	-1.01198
ENSMUSG00000030769.15	Slc5a11	N/A		-1.05827	-0.0582726	-0.73778	-1.61225	-3.2427	-3.2427	-1.02729	-4.05971	-0.210276	-0.0582726	-0.109749	-0.109749	-1.3802	-2.3802	0.26222	-0.73778	3.24916	3.20476	2.22905	2.63568	2.82925	2.34772	1.70968	1.55768
ENSMUSG00000000248.16	Clec2g	N/A		-2.77489	-1.18993	-2.09978	-0.576213	-2.77489	-1.07445	-1.64034	-2.77785	0.179303	0.179303	0.485187	0.707579	0.179303	0.953027	0.0701499	-0.0997753	1.43456	1.1793	1.55844	1.35966	1.65137	2.058	1.29254	1.7204
ENSMUSG00000045932.12	Ifit2	N/A		2.48805	2.55561	2.19438	2.01814	2.37976	2.77178	1.39849	2.28227	-1.31758	0.529525	-0.160069	-1.86988	-1.61157	-1.23915	0.394678	-0.85166	-1.9559	-0.962188	-1.16007	-1.48574	-1.9559	-1.68245	-0.938745	-1.82179
ENSMUSG00000011256.16	Adam19	N/A		2.70852	3.015	2.66993	2.41547	2.79375	2.83008	2.27562	2.61996	0.528186	0.307635	0.384375	-0.441052	0.939072	-0.28055	0.46017	-0.206587	-4.69236	-4.32979	-1.20659	-6.52851	-1.64174	-2.17779	-0.747155	-1.69562
ENSMUSG00000031520.6	Vegfc	N/A		-0.0179682	-0.0179682	-2.5908	-2.5908	-3.20239	-1.3399	-2.5908	-2.5908	-3.20239	-0.169971	-0.728302	0.73113	-2.3399	-3.20239	-2.5908	-1.7283	4.46746	4.06949	3.87161	5.31609	2.86956	2.08637	1.97214	3.51963
ENSMUSG00000038463.8	Olfml2b	N/A		-2.07671	-1.88406	-3.90582	-3.90582	-1.56214	-3.88406	-2.04332	-2.04332	1.24522	1.2034	2.08596	2.38294	1.50825	1.28586	1.83932	3.09623	0.700899	0.115936	0.600536	-0.873395	2.08172	1.26568	1.16613	1.60054
ENSMUSG00000053318.7	Slamf8	N/A		2.16655	1.5245	0.717879	1.1093	2.18562	2.30957	1.18354	1.35798	0.775834	-0.190999	0.71162	-0.0045867	0.758961	-0.0654678	1.00056	0.258448	-2.94999	-3.191	-1.43343	-2.88594	-1.4805	-1.84308	-0.239052	-1.77632
ENSMUSG00000030677.8	Kif22	N/A		-0.900156	-0.900156	-2.04558	-0.875653	-1.38558	-1.70751	-0.345138	-1.46061	2.31486	1.54042	1.50901	1.53938	1.54042	1.65004	1.59828	1.47798	-2.70751	-0.537586	-2.04558	-1.23822	0.992929	0.099844	1.12435	0.761777
ENSMUSG00000041992.9	Rapgef5	N/A		-2.80699	-1.10655	-0.712942	-1.36502	-2.80699	-0.900102	-1.58741	-4.03487	0.147203	-1.80699	-0.172373	-0.850445	-1.63707	-0.900102	-1.85045	-0.172373	3.32229	3.15301	2.41259	2.92566	2.6024	2.7399	2.73452	2.67312
ENSMUSG00000051969.7	Tlr11	N/A		2.72278	2.72278	1.13846	1.65303	2.87659	2.57078	2.13846	2.00918	-0.0141854	1.10129	0.594139	-0.820898	-0.429223	-0.0141854	0.653033	-0.183468	-2.59915	-3.46164	-1.99082	-2.99082	-3.46164	-2.01419	-0.531391	-1.6689
ENSMUSG00000032890.17	Rims3	N/A		-0.362108	-0.827771	-0.765552	-0.119188	-0.760657	-0.89816	-0.431133	-0.645257	-0.760657	-0.696527	-1.48176	0.0684385	-2.63513	-0.696527	-1.70415	-1.28911	2.43812	2.31907	1.71089	2.25778	0.824306	2.05604	0.880812	1.51824
ENSMUSG00000047963.7	Stbd1	N/A		1.86803	2.25075	1.16252	1.99746	2.22246	1.44689	1.6535	1.85995	-0.976317	-1.62839	-0.877012	-0.461974	-0.976317	-0.348286	0.122988	-0.725009	-0.850786	-1.62839	-0.877012	-2.46197	-1.26582	-0.113821	-0.346497	-1.04694
ENSMUSG00000036053.17	Fmnl2	N/A		-1.23812	-0.252336	0.338685	-1.94289	-0.844458	-0.418694	-2.47894	-0.497086	-1.23812	-1.05257	-0.572048	-0.552939	-2.26669	-2.00366	-1.59141	-1.18616	2.92708	2.47962	2.27862	2.12097	2.11459	1.79336	2.21872	1.86447
ENSMUSG00000048200.12	Cracr2b	N/A		1.36064	1.1627	1.7699	1.88008	1.6602	2.00598	1.11454	1.07802	1.1627	0.162701	0.650597	0.493056	1.98213	0.882593	0.114544	1.04054	-3.78726	-3.78726	-4.06988	-2.62242	-0.46533	-2.3398	0.436472	-1.88546
ENSMUSG00000051339.10	AC162528.2	N/A		-1.11429	-3.92165	-4.5329	-1.21097	-1.33668	-4.78414	-4.5329	-4.5329	-1.33668	0.0325489	0.373992	0.539052	-0.921647	-0.599719	-0.500476	0.373992	3.74013	3.69674	3.22442	3.94431	3.85971	2.68568	3.27211	3.58226
ENSMUSG00000036526.8	Card11	N/A		-1.01516	-0.256165	-1.66058	-1.66058	-0.908242	0.142384	-0.621054	-0.158082	-0.358045	-1.25617	-0.338654	-1.50858	-2.25617	-1.54567	-0.743044	-2.50858	1.89911	1.80797	1.97039	1.50041	1.88432	1.86183	3.37895	2.3494
ENSMUSG00000031004.8	Mki67	N/A		-0.571318	-1.20048	-0.690363	-0.301056	-0.953565	-0.867056	-0.560386	-0.956315	2.79711	2.28495	1.39223	1.60806	1.86991	2.22265	0.9091	1.51106	-1.30002	-2.32077	-1.07813	-2.03432	-1.23947	-0.721939	0.0495138	0.150599
ENSMUSG00000029797.13	Sspo	N/A		-2.31665	-0.869192	-0.110231	-2.78008	-0.132226	-1.45415	-2.78008	-0.110231	-2.31665	-1.45415	0.541845	-1.33262	-2.31665	-2.31665	-2.78008	-2.78008	3.95524	3.50004	3.2117	3.27224	2.59024	3.13081	2.8373	2.81033
ENSMUSG00000042035.11	Igsf3	N/A		-0.0202789	-1.89475	-1.35609	-0.619129	-1.89475	-2.47971	-1.94106	-2.80355	0.220729	-0.479711	-2.80355	-0.133702	-3.34221	-3.34221	-1.94106	-0.619129	4.135	3.9715	2.64391	4.36272	2.62881	2.49757	2.45126	2.75938
ENSMUSG00000032531.15	Amotl2	N/A		1.63273	1.5815	1.72618	1.97411	1.1293	1.47325	1.78729	1.80053	1.05613	0.850321	0.712239	1.452	1.44168	0.934386	1.5493	1.6107	-3.79353	-3.57114	-1.58194	-5.83676	-1.67806	-1.05657	-2.3893	-2.80434
ENSMUSG00000102037.1	Bcl2a1a	N/A		-0.463608	-0.826178	-3.30414	-0.982213	-2.63353	-1.82618	-0.719179	-0.304142	0.010323	-1.63353	-2.08175	-0.188664	-3.63353	-2.3116	-2.56718	-1.71918	3.62386	3.39989	3.1109	3.68454	3.25521	3.03889	2.66548	2.40552
ENSMUSG00000027463.14	Slc52a3	N/A		-2.20835	-3.32383	-1.76292	-1.22687	-2.90879	-1.38523	-1.38441	-2.17796	0.735067	1.32003	0.407007	1.15356	1.38583	1.81913	1.05471	1.37459	0.805457	0.986029	0.374586	0.773135	1.11358	1.66107	1.02368	0.390888
ENSMUSG00000073409.12	H2-Q6	N/A		0.623699	0.198608	-0.543255	-0.243695	0.806921	-0.115774	-0.289499	-0.0671067	-1.40667	-1.05437	-0.839972	-2.2437	-2.20638	-3.05437	-0.886143	-2.36923	1.88423	2.26515	1.88043	2.48082	0.927479	1.13149	1.63487	1.48649
ENSMUSG00000032204.13	Aqp9	N/A		-0.667871	-1.18244	-2.19354	-1.19354	-0.404837	-0.989799	-0.456579	-1.45658	-1.66787	-1.18244	-0.971152	0.221493	-1.66787	-0.530368	-0.971152	-1.19354	2.54936	2.48593	1.64776	2.68092	1.13948	2.11873	1.80646	2.07947
ENSMUSG00000035692.6	Isg15	N/A		2.39445	2.0569	1.75256	2.05016	2.20973	2.5137	1.43718	2.41415	-0.66226	0.779745	0.377197	-0.595836	-0.66226	-0.260898	0.544094	-0.306329	-2.22026	-0.997863	-2.89129	-2.0288	-1.93075	-3.22026	-1.1028	-1.65028
ENSMUSG00000030342.8	Cd9	N/A		-2.07062	-1.12507	-1.37588	-4.14141	-1.73805	-2.18165	-1.25389	-3.87838	-0.738047	-0.577582	0.194873	0.318021	-0.99262	-1.39924	-1.07102	-0.655984	3.13594	3.40211	2.54229	4.04347	2.18851	2.09633	2.53666	2.74123
ENSMUSG00000086291.1	AC104889.1	N/A		3.3773	3.42492	2.63359	3.04863	3.23495	2.85857	3.13883	2.32325	0.480059	-1.51994	0.90179	-0.905565	0.406059	0.245594	0.952415	-0.583637	-3.70437	-2.84187	-0.205126	-3.76806	-3.70437	-2.25691	-3.76806	-3.76806
ENSMUSG00000037995.15	Igsf9	N/A		-0.902446	-1.63941	-2.3672	-2.95216	-1.05445	-0.317484	-0.0452704	-2.95216	-2.22437	-1.90245	-1.95216	-1.63023	-1.90245	-0.902446	-0.367198	-1.14481	2.72982	0.530513	3.01362	2.04784	4.2473	3.33787	4.36525	3.98448
ENSMUSG00000086425.7	RP23-475B13.3	N/A		1.90616	0.796533	-0.0955563	1.51588	1.00804	-0.866432	1.5925	-0.458127	2.43125	1.71853	1.68871	2.00131	3.04046	3.22103	2.0383	1.73452	-3.31389	-3.31389	-4.12798	-2.26548	-3.31389	-3.31389	-1.94355	-1.68052
ENSMUSG00000001020.8	S100a4	N/A		-0.029644	0.26888	-0.558049	0.172343	0.137207	0.49704	0.377696	0.435789	0.218575	0.778501	0.483693	0.945897	0.756232	0.683917	0.656122	0.913749	-1.30266	-1.86772	-1.28503	-1.64244	-0.413693	0.273367	0.020524	-0.520294
ENSMUSG00000038751.5	Ptk6	N/A		-2.10937	-2.10937	-2.65112	-2.65112	-2.10937	-2.10937	-1.78863	-2.65112	-0.661911	1.92305	0.670804	0.381297	-2.10937	0.338089	-0.203665	-0.203665	2.50801	2.45357	3.29884	1.5333	2.14544	1.84059	2.29884	1.96626
ENSMUSG00000032220.10	Myo1e	N/A		-2.83887	-2.83887	-1.05291	-4.37484	-1.83887	-3.1019	-1.92738	-4.37484	0.276607	0.190877	0.345638	1.3703	-0.379438	0.705451	-0.605452	0.394548	2.51281	1.98556	1.80959	2.11701	2.79049	2.53617	2.97147	3.32686
ENSMUSG00000032035.15	Ets1	N/A		-1.44812	-1.06961	-0.48935	-1.35185	-0.770046	-0.600121	0.474124	-2.81128	-3.18508	-2.18508	-2.48935	-1.00392	-4.63254	-2.44812	-3.22632	-1.35185	4.76134	4.56087	3.35363	4.02793	3.7922	3.22431	1.69652	3.17172
ENSMUSG00000015396.4	Cd83	N/A		1.74136	2.69245	1.05596	1.23284	2.49268	2.32632	1.70233	2.0402	-4.02803	-2.58057	-1.4676	-2.88264	-1.8436	-4.02803	-1.88263	-3.4676	0.0823979	-0.843602	-0.0752797	0.92472	2.0044	1.98422	1.28729	1.5324
ENSMUSG00000024268.16	Celf4	N/A		2.79905	2.79905	1.38917	2.34187	2.33392	2.13229	2.55392	2.43498	-0.18964	0.333922	-0.864584	-0.0414619	0.132288	-1.86771	-0.172706	-1.10559	-3.18964	-3.18964	-2.98006	-2.98006	-0.4892	-1.60468	0.989565	-1.56502
ENSMUSG00000037706.17	Cd81	N/A		-1.24405	-2.0514	-1.90013	-0.949043	-2.31444	-1.5489	-1.05214	-2.80702	0.00748873	-0.24405	-0.59757	0.747565	0.196523	0.887195	0.0998673	0.170256	1.5828	2.15805	1.39265	2.24283	1.59245	0.978343	1.19298	1.45976
ENSMUSG00000004864.12	Mapk13	N/A		-2.27331	-2.01028	-1.3312	-2.40159	-2.27331	-1.07168	-0.636056	-2.55359	0.797076	0.708539	0.00440168	0.976921	0.237649	0.358955	-0.297254	0.861444	2.13268	1.65269	1.58936	1.79218	0.943918	0.797076	1.19534	0.800043
ENSMUSG00000036617.16	Etl4	N/A		-0.735764	0.379713	-0.282777	-2.73024	1.20284	-0.150801	1.30219	1.77612	1.76674	2.51216	2.30219	1.93962	2.23386	1.76674	2.48981	3.26154	-3.18322	-2.32073	-2.73024	-2.73024	-1.73576	-1.73576	-1.86774	-2.73024
ENSMUSG00000031765.8	Mt1	N/A		-1.58063	-0.580634	-0.659731	-0.301277	-1.73264	-2.09521	-3.13778	-2.03824	1.34537	0.852326	0.727292	1.9856	1.79788	0.980082	1.07723	2.05487	-0.44313	0.0043292	-0.659731	-0.775208	0.769864	0.682401	0.985604	0.741367
ENSMUSG00000099746.1	Ppnr	N/A		-1.52729	-1.83214	-1.85878	-1.93278	-0.112249	-2.33464	-1.78839	-2.59575	-0.493339	0.230144	-0.0514283	-0.322731	-1.33464	-0.396041	-1.93278	-1.32273	3.11106	2.83528	3.55907	3.32906	1.34718	0.506661	2.04811	2.86914
ENSMUSG00000049687.5	Fam109b	N/A		-0.59551	-1.21442	-1.16133	-2.63526	-1.16379	-0.977381	-0.412872	-0.80519	-0.562343	-0.349349	-1.48326	-0.595737	-1.69985	-2.43681	-0.483262	-0.898299	2.85167	2.76613	2.04656	3.02453	1.94401	1.43766	1.7417	1.66242
ENSMUSG00000034459.8	Ifit1	N/A		2.18635	2.42892	1.85188	1.83021	2.11981	2.65865	1.75091	2.17553	-0.981549	0.764519	-0.0946293	-1.20367	-0.981549	-0.319545	0.381291	-0.162533	-2.37844	-1.42735	-1.56795	-1.80061	-2.89301	-1.17681	-1.22772	-1.93271
ENSMUSG00000033327.16	Tnxb	N/A		-2.27728	-2.27728	-2.80134	-0.938842	-0.829822	-2.27728	-0.131487	-2.80134	3.49211	2.90714	2.27061	2.9919	3.31314	3.01148	2.14862	2.48742	-2.27728	-2.27728	-0.938842	-2.80134	-0.414784	-0.0928562	0.868513	-0.353879
ENSMUSG00000033355.6	Rtp4	N/A		2.267	2.15748	1.78663	2.01038	2.16203	2.19048	1.61806	2.14799	-1.30955	0.383123	0.0929699	-1.23116	-0.980931	-0.506999	0.593399	-0.444403	-2.24397	-1.27639	-1.64987	-2.22019	-1.73582	-1.10646	-0.687153	-2.01665
ENSMUSG00000022747.16	St3gal6	N/A		-0.0328622	-0.0328622	0.988684	1.16556	0.230172	0.0144429	-0.797912	-1.31249	-2.61783	-1.48032	-1.94992	-2.79791	-3.35479	-1.76983	-1.21295	-1.66041	2.60714	2.48651	1.55259	2.30642	2.08261	1.8676	1.64834	2.06998
ENSMUSG00000047250.13	Ptgs1	N/A		0.210195	-1.17683	0.531975	0.686697	0.565676	1.23126	-0.0461984	0.403967	0.864199	0.707695	0.636944	0.125982	0.890917	1.15616	1.28787	0.815281	-3.29231	-2.87727	-3.19595	-2.28906	0.752089	0.968222	0.746569	0.295907
ENSMUSG00000039126.10	Prune2	N/A		-1.98987	-3.85237	-3.82143	-3.82143	-1.66794	-0.989872	-0.78901	0.21099	1.18005	1.29553	1.08546	1.43338	1.09759	-0.182517	0.84842	0.500497	0.402446	1.86811	0.84842	0.795953	1.40245	1.43639	0.995261	1.71349
ENSMUSG00000023805.16	Synj2	N/A		0.103762	0.439552	0.0711837	0.275543	0.567709	0.531184	0.934203	0.577369	0.946221	1.32473	0.945653	0.857477	1.61734	1.50128	1.00158	0.985028	-2.98868	-2.75422	-1.08314	-3.45238	-0.967623	-0.321259	-0.645023	-0.467485
ENSMUSG00000041827.15	Oasl1	N/A		1.77458	1.72488	2.08992	1.50772	1.73378	1.70089	1.5592	1.87793	-0.0989285	0.691782	0.50496	-1.25616	-0.496521	-0.89318	0.425422	-0.999383	-1.7707	-1.4156	-1.25616	-1.52295	-1.33898	-1.612	-1.08	-1.85052
ENSMUSG00000015854.7	Cd5l	N/A		-1.47613	-1.47613	-2.15542	-2.15542	-1.47613	-1.47613	-2.15542	-2.15542	-1.47613	-1.47613	-2.15542	-0.292925	-1.47613	-1.47613	-0.292925	-2.15542	-1.47613	2.38637	0.0290034	2.61397	5.60554	5.29326	5.32913	5.54628
ENSMUSG00000019539.11	Rcn3	N/A		-1.9703	-1.81829	-0.665525	-1.57806	-0.332866	-1.23333	-0.578062	-1.4176	-1.81829	-2.55526	-1.4176	-0.380123	-0.818293	-1.05276	-2.3436	-0.578062	3.0741	2.71153	1.30026	2.37887	2.91506	2.8987	2.59186	2.68762
ENSMUSG00000114761.1	RP24-84E18.2	N/A		3.81585	3.6661	3.19966	3.11753	3.7268	3.49265	2.7045	3.64921	-0.748936	-0.246436	1.08703	-1.13948	-0.633459	-0.011971	1.25009	-0.323905	-3.3339	-4.1964	-3.46141	-5.64583	-4.1964	-1.3339	-0.654053	-3.78334
ENSMUSG00000051811.14	Cox6b2	N/A		1.94952	1.57101	1.18071	1.121	1.47147	2.21871	1.121	1.19042	1.57101	1.18768	0.600613	0.948535	1.91205	0.912047	0.948535	0.600613	-3.19838	-3.19838	-3.02874	-2.44378	-3.19838	-3.19838	-0.602479	-1.63643
ENSMUSG00000028871.7	Rspo1	N/A		0.988825	0.905497	0.892677	1.01521	1.33412	1.25676	0.732212	0.83145	1.0536	1.10882	1.12134	0.531248	1.10204	1.22586	1.35392	0.810449	-3.04092	-1.98203	-0.443307	-2.60318	-1.71899	-2.23357	-2.39373	-1.84829
ENSMUSG00000036106.15	Prr5	N/A		1.88028	1.55165	1.12939	2.5217	1.71035	1.55165	1.29931	0.792351	0.447317	1.25467	-0.133649	-0.455577	-0.289649	-0.415179	1.06799	1.00385	-2.87461	-2.87461	-3.31807	-3.31807	-0.874611	-1.06726	-0.455577	-0.133649
ENSMUSG00000045441.5	Gprin3	N/A		2.13848	2.65671	2.30463	1.84166	2.42576	2.46529	2.05847	2.07515	1.13848	0.063189	1.09164	-0.280332	0.983755	0.682099	0.0245233	0.74073	-3.74417	-3.1592	-2.56044	-2.36779	-4.60666	-1.04373	-2.36779	-2.56044
ENSMUSG00000053030.11	Spink2	N/A		0.239797	0.339333	1.23945	-1.26305	0.75437	0.017405	0.993292	1.29495	2.2138	2.2138	1.85243	2.30849	2.47684	2.60237	1.79585	2.84315	-3.43005	-3.43005	-4.29547	-4.29547	-0.567558	-3.43005	-0.625618	-1.84801
ENSMUSG00000020387.15	Jade2	N/A		-0.42679	-0.912217	-1.27506	-3.55516	0.158172	-0.264519	-1.27506	-1.40832	-5.6816	-2.49718	-2.45563	-1.36252	-4.81911	-4.23415	-2.04059	-2.90309	4.96143	4.91729	3.96616	4.8681	4.66067	4.13799	3.75383	3.68733
ENSMUSG00000028789.16	Azin2	N/A		-1.9019	-2.16493	-0.573011	-0.818123	-2.9019	-1.48686	-4.57301	-1.98805	-0.679505	0.268027	-0.66612	0.208349	-0.901898	-0.679505	-0.363558	-0.988049	3.26133	3.04062	2.95447	2.81931	2.32049	1.82602	2.26619	1.72161
ENSMUSG00000031613.9	Hpgd	N/A		1.7379	2.11184	1.52283	1.39811	1.77533	2.29881	1.02756	1.62801	-1.96622	-1.00663	-0.891061	-1.62313	-1.77956	-1.67165	-0.654022	-1.00593	0.0961809	0.43782	-0.623128	0.531776	-1.01898	-1.01485	-0.81927	-0.49175
ENSMUSG00000041073.10	Nacad	N/A		-0.0119154	-1.01192	-1.97525	-1.97525	-1.87441	-1.87441	-1.97525	0.694601	-1.87441	-1.87441	-0.527792	-1.97525	-1.87441	-1.87441	-1.97525	-1.97525	4.3804	3.96536	2.88725	4.20917	1.68852	2.23601	2.05717	2.5311
ENSMUSG00000021701.8	Plk2	N/A		-0.974228	-0.421688	-1.49993	-1.16072	-1.3204	-0.44816	-1.0046	-1.01698	-1.95512	-1.74362	-0.49126	-0.39923	-0.382868	-0.81073	-0.59884	-1.10678	1.37438	1.6393	1.66613	2.12363	2.58974	2.45338	1.73237	1.75621
ENSMUSG00000006310.10	Zbtb32	N/A		-0.744315	-1.57439	-2.40925	-2.67229	-1.93696	-1.74431	-2.40925	-1.40925	0.209881	0.503613	0.81314	0.327714	0.425611	0.983606	0.678211	1.19561	0.840648	-0.100459	0.733706	0.787146	1.55947	1.57761	2.28191	2.0826
ENSMUSG00000000058.6	Cav2	N/A		-0.238032	0.403514	0.439295	-0.195421	0.703074	0.384899	1.32484	0.726577	0.593846	0.963602	1.01608	1.35107	0.609965	1.3755	1.49917	1.90538	-3.88189	-2.42246	-3.44335	-5.30584	0.544376	0.963602	0.171361	0.510848
ENSMUSG00000014158.12	Trpv4	N/A		1.96036	1.68905	1.72292	1.6535	1.80377	1.55354	1.08872	0.770542	0.509146	0.264034	0.526123	0.434492	0.812927	-0.098536	0.231676	0.147611	-2.90589	-3.90589	-3.17432	-1.49624	-0.361571	-1.32093	-1.40878	-0.496245
ENSMUSG00000057729.12	Prtn3	N/A		0.472437	-0.55731	0.140565	0.0603948	-0.749955	0.665082	0.789093	0.712471	2.72809	2.08655	2.16952	2.53844	2.23277	2.54423	2.73847	2.28866	-2.33492	-3.55731	-2.06889	-4.93138	-1.97235	-1.55731	-1.36845	-3.06889
ENSMUSG00000019590.16	Cyb561	N/A		-1.03577	-2.25816	-1.50529	-2.15737	-1.52119	-2.52119	-2.64279	-0.794796	0.156877	0.478805	0.0796728	0.89326	-0.673198	0.24434	0.0796728	-0.379759	2.5056	2.55776	1.80346	2.2052	1.2654	0.800733	1.07967	1.33906
ENSMUSG00000048621.3	RP23-252O5.3	N/A		-0.578794	-0.993831	-0.738006	-0.215779	-2.01691	-0.781286	-0.849651	-1.83316	-1.44755	-0.270671	-1.2482	-0.237313	-1.64918	-0.528167	-1.40995	-0.692682	2.27206	2.4319	1.71583	2.46229	1.51673	2.0457	1.61129	1.43533
ENSMUSG00000111116.1	RP24-167A12.4	N/A		1.61261	1.55765	1.0877	0.761202	1.26347	0.263466	0.93367	1.24335	0.979672	0.915542	0.973747	1.01274	0.778039	0.485858	0.616813	0.511843	-2.3215	-1.66942	-2.40872	-3.21608	-2.3215	-1.54389	-0.692515	-0.82376
ENSMUSG00000097184.1	4632428C04Rik	N/A		-1.81494	-0.229977	-1.49247	-1.17055	-2.3999	-3.2624	-3.35497	-3.35497	-0.592547	-0.399902	-0.492473	1.09249	-1.3999	-0.229977	0.314882	-2.49247	3.24395	2.45808	3.61605	2.79293	2.27252	2.35499	2.39017	2.15138
ENSMUSG00000049119.14	Fam110b	N/A		2.85046	1.92201	2.45027	3.06918	2.39408	2.74917	2.59712	1.89085	-0.710258	-0.447224	-0.772118	-2.21958	0.668253	0.289742	0.450275	-0.0351522	-2.89468	-1.03219	-2.21958	-2.21958	-2.89468	-2.89468	-2.21958	-0.772118
ENSMUSG00000016552.13	Foxred2	N/A		1.81403	1.86634	1.37589	1.20495	1.81403	1.71086	1.55266	1.33777	0.830154	0.431813	0.108007	0.272892	1.10838	0.363836	0.729172	0.23192	-4.6617	-3.22113	-1.76216	-3.37096	-0.854344	-1.20227	-0.309188	-1.37096
ENSMUSG00000036412.5	Arsi	N/A		2.98913	2.84549	1.95153	2.21623	2.16637	2.06266	1.94148	1.93135	0.158009	0.223598	0.639587	-0.411039	-0.268256	-0.361365	0.0295339	0.664249	-3.68329	-2.68329	-1.75896	-4.21839	-1.18079	-2.26826	-0.574538	-2.41104
ENSMUSG00000047139.9	Cd24a	N/A		-2.62611	-2.19315	-1.26062	-2.48301	-2.48861	-1.90365	-1.11802	-2.00384	0.567657	1.30935	0.397406	0.898858	0.494901	0.982695	1.17303	0.992229	0.872137	1.58723	0.73938	0.696595	1.23187	2.1657	0.952374	1.01563
ENSMUSG00000044667.12	Plppr4	N/A		2.06199	2.30613	2.42164	2.37148	2.12326	2.61638	2.15569	2.50502	0.00778675	0.403195	0.564121	-0.476143	0.498773	0.842728	0.380898	0.570724	-4.78663	-1.57718	-3.6191	-4.6191	-2.4647	-2.03174	-0.574707	-1.6805
ENSMUSG00000050377.8	Il31ra	N/A		-0.105764	-0.535908	-0.836145	-1.30081	-1.06137	-3.0183	-0.922301	-1.85721	-0.405324	0.207119	0.163855	-0.39008	-0.783836	-1.35088	-1.42111	-1.16331	2.42171	2.32469	2.37274	2.43471	1.14216	1.1657	1.31743	1.60222
ENSMUSG00000004359.16	Spic	N/A		0.379795	0.307645	-0.138668	-0.094274	-1.80783	-1.39279	-0.184472	-1.23178	-0.454195	-2.39279	-1.55371	-1.67924	-4.84025	-2.39279	-1.81674	-3.13867	4.35092	3.76034	2.87814	3.40049	2.03347	2.44851	1.54783	2.01108
ENSMUSG00000019768.16	Esr1	N/A		1.40716	1.29786	1.9262	1.5373	1.04282	0.918012	1.42116	1.78565	0.243412	0.69272	0.979971	0.0598245	0.520252	0.324332	0.341237	0.622419	-1.2091	-1.9976	-1.43898	-1.43898	-2.2091	-1.03076	-3.15519	-2.64062
ENSMUSG00000074896.3	Ifit3	N/A		2.97674	2.92455	2.22011	2.57816	3.01547	3.11394	1.90663	2.74656	-1.93343	-0.0890813	-0.444206	-2.22181	-1.53488	-1.74901	-0.0356231	-1.19267	-1.32677	-0.792949	-1.31296	-0.91766	-1.9666	-2.63797	-1.29736	-2.02917
ENSMUSG00000020407.13	Upp1	N/A		-3.13922	-1.9693	-2.60199	-4.04945	-5.00172	-3.13922	-4.04945	-2.18695	1.50463	1.872	1.36764	2.68341	0.475487	1.61566	1.39801	2.3049	2.38434	1.77964	1.71994	1.13498	1.49013	2.12756	1.33661	0.942332
ENSMUSG00000037907.16	Ankrd13b	N/A		1.61739	1.40126	1.1618	0.965652	1.4584	1.4584	0.786946	0.754886	0.579255	0.263753	0.137133	0.619002	0.629881	0.7719	0.722095	0.186043	-2.42074	-3.64314	-2.02041	-2.39892	-0.473212	-1.64314	-0.363296	-0.550923
ENSMUSG00000030154.10	Klrb1f	N/A		1.95257	1.77537	1.50229	1.37029	1.29322	1.05741	1.54118	1.32644	1.11036	0.725333	0.963869	0.156515	-0.326506	0.601345	1.04187	0.176414	-1.43613	-2.8767	-1.48985	-3.20606	-2.0991	-1.77717	-1.69148	-1.69148
ENSMUSG00000002944.15	Cd36	N/A		-0.592871	-0.881496	-1.8811	-1.48518	0.751083	-0.299765	-0.745328	-0.283542	-3.29331	-2.74311	-1.73671	-2.10666	-1.77874	-1.25518	-0.407933	-0.719641	1.34642	1.47109	0.598888	2.65315	3.85789	3.41799	2.81421	3.29985
ENSMUSG00000030792.8	Dkkl1	N/A		-4.29834	-4.29834	-4.99312	-1.04317	-2.43584	-4.29834	-4.99312	-4.99312	-0.735405	0.886083	-0.130629	1.67673	1.05601	0.608549	1.01912	1.0393	3.15661	3.25066	3.1958	2.85237	3.72403	3.38433	3.04928	3.32058
ENSMUSG00000111118.1	RP24-84E18.1	N/A		3.95237	3.88227	2.99339	3.11108	4.02394	3.80128	2.73468	3.33632	-0.572843	0.733819	0.59746	-0.913502	-0.220858	0.398398	1.01724	-0.352787	-3.65085	-6.68327	-3.23543	-6.23543	-3.65085	-2.01342	-1.06551	-1.9875
ENSMUSG00000056054.9	S100a8	N/A		-2.75262	-4.61512	-2.89844	-6.22037	-4.61512	-2.4307	-2.77291	-6.22037	4.37923	4.33749	3.50321	5.31146	3.89843	4.50712	4.47106	5.39158	-0.582698	-2.75262	-0.866019	0.0850711	0.334839	0.29177	0.181286	0.0344448
ENSMUSG00000102795.1	RP23-284A15.1	N/A		-1.95382	-1.95382	-1.55873	-1.55873	-1.09132	-1.95382	-1.55873	-1.55873	-0.0913246	-1.95382	-1.55873	-1.55873	-1.95382	0.493638	-0.696237	-1.55873	4.28371	4.0172	3.88873	3.11112	1.0786	1.0786	2.30376	2.30376
ENSMUSG00000041180.13	Hectd2	N/A		-2.08568	-0.986148	-1.73098	-0.824088	-1.1926	-1.1926	-1.27155	-0.643516	-0.805575	-1.08568	-0.643516	-0.207417	-0.308076	-0.369476	-2.14602	-0.923624	2.53323	2.11819	2.07638	2.34584	1.87515	1.49928	1.85398	2.11451
ENSMUSG00000099775.1	RP23-458B6.23	N/A		3.11709	1.68646	2.01375	1.49918	2.41082	1.97025	0.428787	2.15125	1.41082	-0.25214	1.19432	1.01375	-0.029748	0.484825	1.91421	0.807298	-2.6996	-2.6996	-2.75564	-2.75564	-2.6996	-2.6996	-2.75564	-2.75564
ENSMUSG00000047419.5	Cmya5	N/A		-0.655849	-0.556313	-0.253304	-1.01724	-0.41881	-2.14128	-1.57523	-0.657694	-0.25375	-0.908615	-0.790961	-0.81442	-0.681844	-2.65585	-1.74516	-1.83827	2.66865	2.31816	2.76462	2.36075	1.87219	1.41331	1.73462	1.83227
ENSMUSG00000048442.15	Smim5	N/A		2.89884	2.42521	2.17989	2.6462	2.30036	2.45481	1.95433	2.1479	0.324608	0.476611	0.179886	-0.653004	0.763492	0.154683	0.369364	-0.0382943	-4.16724	-4.16724	-2.19357	-5.5155	-1.46681	-1.99732	-0.00914812	-1.06804
ENSMUSG00000042265.13	Trem1	N/A		-2.22348	-1.96044	-3.41138	-3.41138	-1.73805	-2.22348	-3.41138	-3.41138	0.0984511	1.0693	1.09497	1.62104	0.812147	0.454595	0.843431	1.97467	0.978157	1.38533	1.97467	2.0057	1.66405	1.68341	2.03608	2.09497
ENSMUSG00000034855.13	Cxcl10	N/A		3.11007	3.11007	3.62233	3.42173	3.45275	3.87806	2.63613	3.9987	-0.998457	0.586505	0.243814	-1.49315	-1.67653	-0.191102	0.876082	0.00934887	-3.86095	-1.99846	-3.94061	-3.94061	-2.99846	-2.41349	-3.94061	-1.49315
ENSMUSG00000023341.14	Mx2	N/A		2.30192	2.38686	2.28222	2.1531	2.02028	2.00008	1.72298	2.12343	0.216934	0.773607	0.832151	-0.833262	-0.492287	0.0773282	-0.143602	-0.802565	-3.01013	-1.61159	-1.6445	-2.61753	-2.14764	-2.51537	-0.787458	-2.28496
ENSMUSG00000027322.11	Siglec1	N/A		3.56515	3.03228	3.49495	3.72089	3.58729	3.42231	2.95769	3.33833	-0.92507	0.236681	0.746887	-0.528455	-1.39832	-0.709681	1.18541	-0.292642	-6.22275	-2.94973	-7.13242	-7.13242	-1.00036	-0.637788	0.0788059	-0.437032
ENSMUSG00000060275.12	Nrg2	N/A		1.63141	2.27386	0.97192	1.49917	1.82844	2.48331	1.46942	1.55688	1.66617	0.443781	1.55688	1.01374	0.858818	-0.141181	0.0543818	-0.415104	-1.72614	-2.14118	-0.945618	-2.11554	-3.58864	-3.58864	-2.11554	-2.53058
ENSMUSG00000059401.13	Mamld1	N/A		3.5514	2.95194	3.29999	2.88495	3.33381	3.49251	2.71503	2.52238	-1.95495	-1.95495	-0.284973	-2.14747	-1.95495	-0.507492	-0.700011	-2.14747	-1.95495	-1.95495	-2.14747	-2.14747	-1.09245	-1.95495	-2.14747	0.299989
ENSMUSG00000000957.11	Mmp14	N/A		-1.84622	-1.18325	-1.27716	-1.27716	-3.43118	-3.43118	-1.58201	-3.34755	0.890749	-0.0388618	-0.540191	0.213169	-0.73074	-0.145777	0.307806	-0.0547643	3.49066	2.59119	1.55934	2.59262	1.89075	1.94386	1.4904	1.91549
ENSMUSG00000026807.8	Ak8	N/A		0.513746	0.928783	1.18536	0.850008	0.704077	0.96981	1.35647	0.752397	0.942589	1.13523	0.708454	1.13091	0.671287	1.47627	1.14196	1.01543	-2.18669	-2.77166	-2.43203	-4.3065	-1.07122	-1.31222	-0.937263	-0.465194
ENSMUSG00000071547.4	Nt5dc2	N/A		-0.674735	-0.972416	0.37844	-0.0809917	-0.114435	0.582173	-0.759064	-0.250917	1.30681	1.48702	1.51063	1.70908	1.62253	1.86047	1.9827	2.01587	-2.97242	-2.30945	-2.55048	-3.66595	0.156867	0.0275841	0.569262	-0.858599
ENSMUSG00000039115.13	Itga9	N/A		-1.24992	-1.47231	-2.8512	0.181217	-0.735347	-1.24992	-2.8512	-2.8512	0.264653	-0.150385	-0.988708	-0.988708	-3.91977	-3.91977	-2.8512	-2.8512	3.23735	3.40216	3.59625	4.61121	2.67065	3.12263	3.68372	4.16104
ENSMUSG00000000184.12	Ccnd2	N/A		-0.644459	-1.08056	-0.458905	-1.08039	-1.70859	-1.70859	-0.780833	-4.64333	-2.16802	-0.998096	-1.78083	-1.78083	-5.03052	-2.16802	-2.78083	-3.78083	4.01685	4.1629	3.59421	5.35616	3.51497	3.81212	3.95726	4.17917
ENSMUSG00000029392.12	Rilpl1	N/A		3.44976	3.67505	3.58277	3.60163	3.83917	4.04148	2.03528	3.4223	-0.699985	-0.378057	-1.66516	-0.343231	-1.11502	-2.56248	0.142196	-2.52766	-2.56248	-2.56248	-2.52766	-2.52766	-2.56248	-2.56248	-2.52766	-0.665159
ENSMUSG00000026196.7	Bard1	N/A		-0.847579	-1.7374	-1.01186	-1.78445	-0.415467	-1.333	-0.909984	-1.9771	-0.758769	-0.0833917	-0.121488	-0.415219	-0.558072	-0.398594	-0.347047	-0.536525	2.18357	2.29668	2.15806	2.60213	0.576021	1.07601	0.830257	1.51323
ENSMUSG00000004151.17	Etv1	N/A		1.07022	0.61956	-0.153551	1.06884	0.800132	0.757063	1.36582	1.39899	0.61956	-0.117406	1.52452	1.18749	1.32738	2.01645	1.55427	1.18749	-3.28733	-4.14983	-3.92294	-3.92294	0.172101	0.172101	-1.47548	0.187486
ENSMUSG00000062515.3	Fabp4	N/A		-1.22288	-0.609907	-3.81328	-2.22832	-1.98842	-2.98842	-3.22832	-1.90639	-1.60991	-0.310346	-0.00592375	0.0447025	-2.98842	-2.98842	-1.00592	-1.81328	4.07336	4.34965	3.63999	4.54976	3.08626	3.19745	2.6584	3.10856
ENSMUSG00000054203.7	Ifi205	N/A		2.64787	2.6889	2.38003	2.6366	2.7617	2.75478	2.09014	2.69808	0.212773	1.09248	-0.367208	-0.545745	-0.730643	-0.0250907	0.746507	-0.478239	-4.43108	-2.84612	-2.34449	-4.47002	-2.32675	-1.79882	-0.625669	-1.72
ENSMUSG00000022895.14	Ets2	N/A		-1.1934	-0.576732	-1.44738	-1.28195	-0.805674	-1.37237	-1.15542	-1.00893	-1.65735	-1.57673	-1.03909	0.0254774	-0.960742	-0.365584	-0.950438	-0.552217	2.03156	1.61223	1.64879	2.311	2.38955	2.47525	1.60557	1.84458
ENSMUSG00000002007.5	Srpk3	N/A		-2.06368	-1.47872	-2.54358	-0.0961182	-2.92618	-0.256328	-2.54358	-2.54358	-1.06368	-2.06368	-1.09612	-2.54358	-2.06368	-1.47872	-1.09612	-2.54358	3.93632	3.41205	3.99134	4.27312	3.2031	2.84321	3.46867	3.27312
ENSMUSG00000024899.6	Papss2	N/A		1.43125	1.66605	1.32405	1.09759	1.71096	1.91668	1.1753	1.31427	1.30511	1.0581	0.765651	1.09188	1.07538	1.15879	1.36253	1.03346	-3.31694	-5.31694	-2.36184	-2.8854	-1.45896	-1.22948	-1.67595	-2.24154
ENSMUSG00000004668.14	Abca13	N/A		-3.03068	-5.03068	-1.90604	-2.25967	-2.80829	-2.29371	-2.4296	-3.25967	3.03002	2.19171	2.38418	2.38739	2.39838	2.81062	2.01749	2.84187	1.41226	0.593812	0.453045	0.32529	0.471822	0.254724	-0.648238	0.0939641
ENSMUSG00000016239.11	Lonrf3	N/A		1.67637	1.90903	2.10781	1.51057	1.35444	0.676372	0.869024	1.43462	0.524369	0.354444	1.26956	-0.774832	0.676372	-0.323628	-0.604908	0.395093	-3.50805	-3.50805	-3.63733	-2.77483	-0.186124	0.354444	0.395093	-0.18987
ENSMUSG00000044338.9	Aplnr	N/A		3.90279	3.73721	3.44089	3.17786	3.9707	3.6673	1.90323	3.66328	-0.472247	0.615216	-0.0509632	-1.466	-2.47225	-0.472247	1.0365	-0.0509632	-3.33474	-2.47225	-2.91346	-2.91346	-3.33474	-3.33474	-2.91346	-2.91346
ENSMUSG00000027398.13	Il1b	N/A		-0.371928	-0.427026	-1.05836	-0.558369	-1.34184	-0.63024	-0.450807	-0.943536	-1.56313	-2.05474	-1.76575	-0.309488	-1.59432	-0.743698	-1.80818	-0.881806	2.37581	2.41892	1.94909	2.67487	1.76956	2.16261	1.4454	1.70693
ENSMUSG00000017652.16	Cd40	N/A		1.36442	1.29746	1.4941	1.18308	1.57696	1.65392	1.29902	1.70638	0.230834	0.498645	0.380247	-0.186404	0.0796275	-0.364936	0.613131	0.299023	-2.77636	-2.13482	-2.54786	-4.01735	-0.513327	-0.912424	0.304583	-0.527961
ENSMUSG00000029561.17	Oasl2	N/A		2.69453	2.37812	1.72952	2.07824	2.51341	2.4377	1.42365	2.16423	-0.802413	0.729329	0.453156	-0.500649	-0.698819	0.112391	0.700809	-0.535415	-2.66148	-2.01805	-1.95806	-2.12245	-2.72609	-1.95861	-1.40678	-2.02623
ENSMUSG00000000386.14	Mx1	N/A		2.01875	1.90111	1.96432	1.64228	1.83802	1.7563	1.38233	1.74596	-0.155922	0.299953	0.342761	-0.986222	-0.452478	-0.508421	-0.150853	-0.96865	-1.60932	-1.32771	-1.28361	-1.78828	-1.72055	-2.03973	-0.526791	-1.37325
ENSMUSG00000000359.3	Rem1	N/A		1.92311	1.34856	1.94032	1.67056	1.95072	1.11227	1.57295	1.63645	1.50575	1.02404	1.84796	1.04803	1.86625	1.27402	1.72351	1.53642	-2.77038	-3.44845	-2.90098	-5.9334	-2.60045	-3.18542	-2.07091	-2.07091
ENSMUSG00000029287.14	Tgfbr3	N/A		-0.136564	-0.156193	-0.413021	-0.572499	1.10931	-0.380233	-1.01911	-0.300127	-3.76106	-3.34602	-1.86201	-2.05793	-2.39182	-1.91975	-1.75182	-1.2847	2.77163	2.6582	1.91894	2.90134	2.93707	2.61543	2.07809	2.36284
ENSMUSG00000030246.11	Ldhb	N/A		3.03604	3.10696	2.23595	2.47042	2.75952	2.94962	2.10269	2.44005	0.668665	0.806169	0.921081	0.955846	0.9317	0.112272	0.421509	0.291449	-2.16784	-3.97519	-1.52958	-4.43647	-3.39023	-4.83769	-3.43647	-2.43647
ENSMUSG00000025804.5	Ccr1	N/A		0.712727	0.0871224	0.83358	0.819295	0.834357	0.996759	1.00745	0.8121	1.89742	1.45768	1.22894	2.54979	2.21758	2.43964	2.11953	2.60704	-4.23481	-4.72023	-2.92487	-6.69425	-0.775374	-0.912878	-1.0504	-1.30819
ENSMUSG00000002602.16	Axl	N/A		2.66412	2.32786	1.71416	1.78953	2.67446	2.30365	0.818038	2.08647	-0.127754	-0.207754	0.496816	-0.437675	0.0730991	-0.375308	0.694304	-0.21914	-2.91136	-3.08645	-3.04986	-2.71971	-1.5977	-1.73686	-0.333651	-0.839291
ENSMUSG00000002233.13	Rhoc	N/A		-2.88308	-2.88308	-2.71208	-2.71208	-1.02058	-1.02058	-2.71208	-2.71208	-2.02058	-1.43562	-1.26462	-0.0422323	-2.02058	0.438849	-0.0422323	0.150413	1.97942	2.70734	1.67397	1.79427	4.37173	3.78677	4.33032	4.24844
ENSMUSG00000078247.3	Airn	N/A		-1.75392	-1.75392	-1.97066	-1.97066	-1.75392	-1.75392	-1.97066	-1.97066	-0.306464	-1.75392	-0.523197	-1.97066	-0.891427	-1.75392	-1.97066	0.213769	3.72328	3.10857	2.28416	3.28416	2.19604	2.69354	2.89184	3.6732
ENSMUSG00000027315.13	Spint1	N/A		-4.32615	-4.32615	-4.32304	-4.32304	-4.32615	-4.32615	-4.32304	-2.13861	2.77475	2.69621	1.66874	3.97825	1.66563	3.05991	1.12442	2.90578	2.0282	1.82175	0.124424	1.34682	0.623806	2.63438	1.56183	2.39744
ENSMUSG00000023992.14	Trem2	N/A		0.7937	0.259364	2.00839	1.12449	0.705163	0.686785	0.168432	1.09443	1.76771	1.60106	1.72425	2.00839	1.78509	1.44578	2.01643	1.66413	-3.01365	-3.27669	-3.89046	-4.47542	-0.740636	-2.01365	-0.774984	-2.66807
ENSMUSG00000073418.4	C4b	N/A		-1.64002	-2.39134	-3.17292	-2.58796	-1.68352	-2.03144	-1.72122	-1.88534	0.762467	0.996392	1.25925	1.17841	1.61166	1.2792	2.08613	1.66146	-0.759069	-0.683518	0.842905	-1.09046	2.47656	2.06262	2.0828	1.34695
ENSMUSG00000029343.17	Crybb1	N/A		1.31191	0.131334	1.5431	0.937375	1.582	1.13133	1.27179	0.413813	0.924883	1.65071	1.08624	0.80613	1.4339	2.26884	1.75366	1.69921	-3.63805	-3.63805	-4.44868	-4.44868	-2.19059	-0.968201	0.271793	-0.885748
ENSMUSG00000026153.15	Fam135a	N/A		-1.51755	-1.51755	-1.14887	-1.95622	-1.83948	-1.11702	-0.786295	-1.63429	-0.278767	-0.139042	-0.746767	0.233604	-0.637848	-0.073947	-1.25578	-0.255781	2.45698	2.2352	1.84468	2.30117	1.11471	1.31432	1.3384	2.06615
ENSMUSG00000040147.14	Maob	N/A		2.58186	2.97779	2.27992	3.27992	2.70317	2.14129	2.48937	2.08727	0.655863	-0.443673	0.0872746	0.739351	0.918897	0.918897	1.08727	-1.72008	-3.11352	-3.11352	-2.58258	-2.58258	-3.11352	-3.11352	-2.58258	-2.58258
ENSMUSG00000000318.16	Clec10a	N/A		1.35132	1.74183	1.26624	1.39177	1.41343	1.67579	1.01942	1.38199	0.776901	0.259625	0.398253	0.219405	0.453396	0.321401	0.304712	0.174782	-4.47734	-2.97484	-2.27336	-4.23272	-0.17966	-0.361863	0.504244	-0.154719
ENSMUSG00000053338.9	Tarm1	N/A		0.15186	-0.17391	0.61294	0.598726	-0.495838	0.0567031	0.798496	0.21664	1.41105	1.76218	1.45621	2.52172	2.22663	2.28027	2.00121	2.39379	-3.59537	-2.59537	-2.97202	-4.05948	-0.380361	-0.647841	-2.15259	-1.41563
ENSMUSG00000020614.13	Fam20a	N/A		-1.57813	-3.50413	-2.5805	-2.69597	-1.57813	-3.24109	-3.95901	-3.11101	-1.65613	0.343868	0.226857	0.661577	-0.399793	-0.271469	0.178494	-0.236543	2.86044	2.89504	2.8406	2.76072	3.32623	2.8033	2.94306	2.97173
ENSMUSG00000026835.15	Fcnb	N/A		1.11352	0.113523	0.443659	0.00755978	-0.301515	1.06772	1.41195	0.168025	2.75738	2.26327	2.54945	2.82699	2.90794	3.21155	2.88588	3.02862	-3.74897	-3.74897	-3.9424	-1.49494	-3.74897	-1.88648	-3.9424	-3.9424
ENSMUSG00000029648.13	Flt1	N/A		2.21151	2.19417	1.60883	1.73035	2.858	2.58921	1.56629	2.05397	-1.14629	-0.945078	-0.302921	-0.893667	-0.0421772	-0.196211	0.59548	-0.261211	-2.91969	-3.09803	-1.54078	-2.34587	-0.525779	-0.979635	-0.678742	-1.53174
ENSMUSG00000037224.15	Zfyve28	N/A		3.69082	3.70718	3.04316	3.41584	3.67427	3.84172	3.19831	3.09877	0.352336	-0.21882	1.61335	-0.62612	1.40678	0.0781617	1.58766	0.393779	-2.76314	-3.3481	-3.79605	-5.65854	-5.2106	-5.2106	-3.47412	-2.79605
ENSMUSG00000019194.15	Scn1b	N/A		-1.82247	-1.19444	-1.51129	-2.40437	-1.58146	-2.11198	-1.75229	-1.75229	-0.327707	-0.111978	-0.56787	0.543162	-0.327707	-1.37501	0.180592	0.0736766	2.29553	2.57608	2.17198	2.21454	2.09314	1.88802	1.55646	1.24771
ENSMUSG00000056498.13	Tmem154	N/A		1.82461	1.58204	1.35658	1.5893	1.78632	2.30018	1.41451	1.42735	1.85183	1.57388	1.25647	1.00548	2.0962	1.97764	1.9743	1.45773	-6.75214	-4.88964	-3.18864	-6.12724	-2.1892	-1.16172	-0.582915	-1.58291
ENSMUSG00000066952.11	Myo1h	N/A		1.35806	1.6738	1.24562	1.17081	1.489	0.99793	0.994811	1.18288	1.01107	0.984675	1.18288	0.327655	1.21403	0.948718	0.789062	0.542779	-2.31523	-2.77466	-1.06104	-2.78541	-2.31523	-2.27216	-1.45099	-2.13904
ENSMUSG00000028125.14	Abca4	N/A		3.45203	3.52075	3.65645	2.63655	2.67944	2.18194	3.02121	3.29951	-0.905519	-1.76801	-0.211449	-0.211449	-0.320556	-1.76801	-0.211449	-2.39587	-1.76801	-1.76801	-2.39587	-2.39587	-1.76801	-1.76801	-2.39587	-2.39587
ENSMUSG00000033278.10	Ptprm	N/A		-2.76959	-2.76959	0.90441	-3.12801	-2.76959	-1.90709	-3.12801	-0.943587	-2.76959	-1.32213	-3.12801	-2.26552	-2.76959	-2.76959	-3.12801	-3.12801	4.71496	4.85446	4.29673	4.07433	5.0759	5.20143	4.91439	4.6593
ENSMUSG00000026837.15	Col5a1	N/A		-2.40629	-2.40629	-3.21332	-2.35083	-1.82133	-3.26879	-3.21332	-3.21332	-0.821332	1.23756	0.349612	0.819098	-0.821332	0.40106	0.8971	-1.0289	3.4392	3.14829	3.55606	3.45653	1.6381	1.68117	2.00672	1.93457
ENSMUSG00000085394.1	RP23-49A12.1	N/A		-1.35692	-1.35692	-1.79984	-1.79984	-1.35692	-1.35692	-1.79984	-1.79984	-1.35692	-1.35692	-1.79984	-1.79984	-1.35692	-1.35692	-1.79984	-1.79984	4.02914	4.06017	3.79057	4.5056	2.6755	0.0905402	2.64761	3.45497
ENSMUSG00000033826.9	Dnah8	N/A		0.420374	0.299622	0.0692782	0.663826	0.07723	0.229233	0.634876	0.270912	1.57501	1.54634	1.51288	1.04013	1.43609	1.77767	0.956804	1.25197	-2.28534	-2.77077	-1.81969	-2.48711	-0.949737	-1.35573	-0.32665	-1.76722
ENSMUSG00000107355.1	RP24-80F7.5	N/A		0.999802	0.999802	1.4291	1.253	1.08505	1.47624	1.3905	1.80208	0.893079	0.65575	1.17766	1.21971	1.03695	0.854752	1.45353	1.40424	-2.91969	-2.99769	-2.77254	-4.90182	-1.14525	-0.938798	-1.85743	-1.59804
ENSMUSG00000026822.14	Lcn2	N/A		-5.21977	-4.4828	-3.36656	-2.89707	-5.21977	-3.3453	-3.48203	-6.92949	3.36394	3.56704	3.4546	4.41531	3.67404	4.13632	4.14368	4.29933	0.462055	0.578972	0.8872	-0.607564	0.950156	1.53512	-0.234106	0.316708
ENSMUSG00000032554.15	Trf	N/A		1.35843	1.41983	1.19087	1.56716	1.83486	2.12765	1.4785	1.77996	-0.532868	-0.239136	-0.349319	-0.244983	0.779723	-0.532868	0.626433	0.235643	-0.843208	-1.02763	-1.76436	-1.14769	-2.02763	-2.31714	-1.32547	-2.04676
ENSMUSG00000086213.2	AC129014.2	N/A		3.24102	2.90182	3.51584	2.21628	3.2547	2.67652	2.51584	2.95324	0.11174	-0.0137911	0.252802	-1.48416	-0.473223	-0.665868	-0.0691264	-1.48416	-3.33572	-3.33572	-2.93162	-2.93162	-1.88826	-2.47322	-0.484164	-2.06913
ENSMUSG00000001930.17	Vwf	N/A		-0.896386	-1.4571	-1.1763	-3.06083	-1.92105	-2.02414	-2.11741	-1.43934	-0.756661	-0.179117	-0.269414	0.0460873	-0.946139	-1.25547	-1.36895	-0.551814	3.10819	2.59166	2.7623	3.19438	2.01539	1.72082	1.69816	2.28313
ENSMUSG00000055172.10	C1ra	N/A		0.950502	1.45746	1.988	0.987996	1.50993	1.74697	1.60948	0.931412	1.60947	0.8725	1.81112	1.95998	1.9505	1.09489	1.71382	0.987996	-3.15992	-3.15992	-2.12748	-3.57494	-1.71246	-3.15992	-3.57494	-2.71244
ENSMUSG00000016526.8	Dyrk3	N/A		1.17635	1.8126	0.592449	1.67881	1.48002	1.49332	1.49559	1.06037	1.06499	0.812598	0.785094	0.611064	1.85442	1.69092	1.42895	0.833457	-2.95294	-4.27486	-2.58687	-3.08938	-2.46751	-1.6899	-1.08938	-1.72014
ENSMUSG00000030745.9	Il21r	N/A		-1.58609	-3.43408	-2.57536	-1.89729	-2.66855	-2.29658	-2.50497	-3.43786	0.221267	0.453441	-0.239076	0.739338	-0.948658	-0.948658	0.43363	-0.421553	3.32347	3.63523	2.34112	2.70448	2.20109	2.04812	2.81524	2.04229
ENSMUSG00000070873.5	Lilra5	N/A		-1.06085	-1.46139	-3.10334	-2.17734	-1.61339	-2.46139	-2.51838	-2.96584	-0.801461	-1.03915	0.129316	0.432708	-1.52028	-1.37732	-0.494535	-0.670385	3.11997	2.82845	2.99258	3.18944	2.84458	2.54222	2.65688	2.52892
ENSMUSG00000024597.10	Slc12a2	N/A		0.0152044	0.0423889	-1.37807	-1.20299	-0.984796	-1.35861	-1.56408	-1.4619	-2.27954	-1.27954	-0.468083	-0.881058	-2.48599	-2.33843	-2.12282	-1.68841	3.27628	3.47962	2.66773	3.74988	2.04239	1.87102	1.82255	2.52727
ENSMUSG00000026712.3	Mrc1	N/A		2.49194	3.03918	2.35248	2.51878	2.60394	3.30978	2.359	2.598	-0.486827	-1.62433	-0.0778685	-0.850458	-0.846723	-0.413764	-0.187493	-0.820711	-3.58369	-2.94626	-3.62807	-4.85046	-0.344223	-1.19903	0.793398	-0.206602
ENSMUSG00000078763.2	Slfn1	N/A		1.64694	2.19368	1.51475	1.33306	2.37539	2.27829	1.00703	1.47576	-0.2706	0.928709	0.410054	0.245934	0.466366	0.183966	1.15321	0.769748	-3.02549	-2.70356	-2.35652	-2.42867	-2.21813	-1.85556	-1.41029	-1.71407
ENSMUSG00000048534.7	Amica1	N/A		0.171373	0.192538	0.218609	0.0144095	0.164248	-0.0427518	0.173986	0.0144095	1.33576	1.41293	1.55366	2.05188	2.25758	2.26259	1.52137	1.91397	-2.44957	-3.79352	-3.01113	-1.84885	-0.587072	-0.924107	-1.08151	-1.5208
ENSMUSG00000017754.13	Pltp	N/A		-0.948953	-1.6125	-1.53029	-1.557	-0.426751	-0.816197	-1.16233	-1.18299	-1.82574	-0.800429	-0.645029	-0.419909	-0.901086	-1.23229	-0.452981	-0.444642	1.5215	2.06876	1.54597	1.50081	2.6235	2.3502	2.16607	2.18232
ENSMUSG00000018168.8	Ikzf3	N/A		-0.218063	-0.647747	-0.882638	-1.35212	-0.240089	-0.677495	-1.12183	-0.352123	-3.4551	-0.836192	-0.748783	-1.84311	-3.94053	-2.67749	-2.88264	-3.35212	4.09509	4.30455	3.49915	3.95517	2.18049	2.11258	2.32465	2.7564
ENSMUSG00000031898.9	Dpep3	N/A		-2.91269	-2.91269	-3.34287	-2.48038	-2.05019	-2.91269	-3.34287	-3.34287	0.949808	1.19774	0.979054	1.22006	1.27174	0.949808	-0.158449	0.607086	2.30736	1.03727	2.80503	2.40227	2.03727	1.03727	2.13433	2.51962
ENSMUSG00000030107.10	Usp18	N/A		2.38815	2.52066	1.93387	2.18614	2.31421	2.53239	1.73728	2.23171	-0.600062	0.587773	0.211273	-0.758714	-0.902909	0.0214272	0.363276	-0.243292	-2.57468	-2.09405	-1.74184	-2.19083	-1.89242	-2.3005	-1.26121	-2.46767
ENSMUSG00000032232.14	Cgnl1	N/A		2.56669	2.37332	2.50716	2.21969	2.7898	2.53364	2.40288	2.73315	1.1962	0.925343	0.805581	0.509449	1.62095	0.986743	1.72137	0.947134	-3.79086	-6.46072	-4.79433	-3.98698	-1.84333	-2.89778	-1.27077	-3.79433
ENSMUSG00000002108.10	Nr1h3	N/A		-0.942918	-1.17996	-1.61574	-0.715274	-1.08042	-2.46375	-1.61574	-2.10759	-0.612273	0.162436	-0.2007	0.293288	-1.62976	-0.62976	-0.664648	-1.13031	2.35698	2.51452	2.05732	2.02169	1.74401	1.76088	1.8754	1.8023
ENSMUSG00000079164.8	Tlr5	N/A		1.64455	1.15551	1.56928	1.1088	1.56102	1.74888	1.69761	1.29276	1.80644	1.68017	1.16539	1.48287	1.57055	1.6355	1.24105	1.08553	-4.67738	-3.67738	-4.27202	-2.85698	-3.35545	-1.09242	-2.04963	-1.46466
ENSMUSG00000032356.12	Rasgrf1	N/A		-1.96773	-1.96773	-1.48328	-1.48328	-1.96773	-1.96773	-1.48328	-1.48328	-1.96773	-1.96773	-1.48328	-1.48328	0.216694	-1.96773	-1.48328	-1.48328	3.44935	2.47973	2.28611	1.83865	2.93916	4.68918	3.90278	3.83865
ENSMUSG00000041801.5	Phlda3	N/A		-0.962582	-2.82508	-2.18959	-2.18959	-1.96258	-2.82508	-2.18959	-2.18959	-2.82508	-0.962582	-2.18959	-0.742127	-0.962582	-0.962582	-1.32709	-2.18959	4.18717	4.39497	3.16476	4.84284	2.73786	2.96815	3.31677	3.88236
ENSMUSG00000046447.3	Camk2n1	N/A		-2.69946	-2.69946	-2.3212	-2.3212	-1.252	-2.69946	0.711222	-2.3212	-1.83696	-2.69946	-2.3212	-2.3212	-2.69946	-0.836961	-2.3212	-2.3212	4.50289	5.00224	4.18515	4.38679	3.55536	4.36271	3.42394	3.5413
ENSMUSG00000025330.6	Padi4	N/A		0.967506	0.569951	1.33596	1.18996	1.08486	0.725679	1.19865	1.03116	0.850957	0.852351	0.976619	0.8263	1.38576	0.967506	1.30611	1.15466	-2.30508	-3.16306	-2.32275	-4.09327	-0.823214	-1.11322	-1.26186	-1.34152
ENSMUSG00000087248.7	AC137511.1	N/A		0.152381	-1.34643	-1.41069	-2.41069	-1.78252	-3.06263	-2.41069	-2.14766	-0.740704	0.084209	0.534166	-0.147658	-2.41056	-2.54806	-1.82573	-1.5627	3.7206	3.77567	3.562	3.50578	1.95656	2.20148	2.00209	2.31177
ENSMUSG00000002500.15	Rpl3l	N/A		-1.18862	-0.995978	-1.05144	-1.05144	-3.85847	-2.41102	-3.57501	-4.57501	0.25195	0.32595	-0.182687	1.34386	-0.67405	0.25195	0.068851	-0.0204163	2.58898	3.1333	2.70112	2.54912	1.52758	1.04842	1.87621	1.91685
ENSMUSG00000031844.8	Hsd17b2	N/A		-1.62154	-1.62154	-1.69693	-1.69693	-1.62154	-1.62154	-1.69693	-1.69693	-0.759039	-1.62154	-1.69693	-0.834434	-0.759039	-1.62154	-0.249472	-0.834434	4.32842	2.32842	3.33549	2.86601	2.76452	1.82592	2.33549	1.86601
ENSMUSG00000056071.12	S100a9	N/A		-4.99276	-4.99276	-5.41008	-5.41008	-4.99276	-2.32291	-5.41008	-5.41008	4.2897	4.13886	3.41531	5.14154	3.84987	4.5667	4.41241	5.21645	0.361588	-1.67083	1.38315	0.452412	-0.223374	1.98868	0.452412	1.16666
ENSMUSG00000009739.17	Pou6f1	N/A		-1.04692	-1.63189	-2.13965	-1.13965	-0.705885	-1.63189	-1.91726	-0.554687	-1.04692	-1.95381	-2.72461	-1.02417	-1.25337	-1.63189	-0.917257	-1.55469	3.3636	3.27981	3.17021	3.71002	1.96505	2.29411	2.37342	2.71833
ENSMUSG00000016498.9	Pdcd1lg2	N/A		-2.67441	-2.67441	-3.05505	-3.05505	-2.67441	-2.67441	-3.05505	-3.05505	-1.22696	-2.67441	-0.870627	0.266876	-2.67441	-2.67441	-1.19256	-0.870627	5.27023	5.21599	3.2993	4.165	4.916	4.54563	3.46566	3.95719
ENSMUSG00000047592.17	Nxpe5	N/A		1.67529	1.30147	1.65823	1.20712	1.87965	2.08246	2.7737	1.03262	1.23919	1.57799	1.05309	1.50325	1.57799	1.75164	1.88062	1.73623	-4.71077	-3.84827	-4.95916	-4.95916	-1.26331	-3.26331	-0.63723	-2.28931
ENSMUSG00000059994.10	Fcrl1	N/A		-1.59765	-1.38615	-1.93857	-1.16805	-1.45326	-3.26062	-2.44107	-2.85611	-0.290992	-0.290992	-1.21868	0.183422	-0.891385	-2.03823	-0.778104	-0.534178	3.39997	2.94558	3.06408	3.09809	2.55956	2.30417	2.08771	2.50145
ENSMUSG00000028459.11	Cd72	N/A		-1.92185	-4.5917	-4.51658	-4.51658	-2.72921	-2.40728	-1.48416	-2.65409	-3.72921	-2.14424	-1.84673	-1.19466	-2.72921	-1.14424	-0.747197	-3.65409	5.79043	6.05215	5.00591	5.91767	4.48754	5.06683	4.88313	4.80739
ENSMUSG00000031442.20	Mcf2l	N/A		1.45994	1.47336	1.56735	1.26532	1.55768	1.27307	1.38535	0.588562	1.67848	1.3551	1.14158	0.874234	1.53226	1.41196	1.10524	0.766654	-2.82209	-3.69656	-1.92451	-2.60258	-2.1116	-3.1116	-2.05004	-2.11715
ENSMUSG00000022057.8	Adamdec1	N/A		-1.94257	-3.39003	-2.89513	-2.89513	-3.39003	-3.39003	-2.89513	-2.03264	-0.0680978	-1.2056	-2.03264	-1.44767	-1.52753	-0.942567	-0.0326364	-2.03264	4.8861	4.28625	3.62557	5.49874	3.4837	3.20039	2.85001	4.28929
ENSMUSG00000045087.8	S1pr5	N/A		-0.33911	-0.765527	-0.820927	-0.90574	-0.366077	-1.04564	-1.29541	-1.03007	-0.891651	-0.95724	-0.618642	-0.540525	-1.40368	-1.72054	-0.462523	-1.01001	2.30105	2.52238	1.93894	2.28463	1.33835	1.32768	1.21177	1.24851
ENSMUSG00000053559.13	Smagp	N/A		-1.81755	-1.58051	-2.59247	-2.11603	-1.13305	-1.41545	-1.68977	-1.62418	-1.71802	-0.133055	-0.209141	-0.0179996	-0.952483	-0.396089	-0.185295	-0.516119	2.21744	2.66049	2.35767	2.43472	2.00445	2.26384	1.98463	2.17399
ENSMUSG00000051682.15	Treml4	N/A		-0.540764	-1.08663	-0.512716	-1.34076	-1.19058	-1.525	-1.79413	-1.8165	-0.961096	-0.0750999	-0.365285	0.233352	-1.3574	-1.80063	-0.750407	-1.14407	2.61855	2.71022	1.98117	2.54545	1.64841	1.56	1.38808	1.57582
ENSMUSG00000084956.7	RP23-73N16.7	N/A		2.14294	2.2304	3.00397	2.44301	1.80591	2.21619	2.44301	2.22774	1.68726	1.44062	1.45723	0.994253	1.53526	1.11257	1.33939	0.539688	-3.44202	-4.30452	-4.0777	-2.2152	-4.30452	-2.12009	-4.0777	-4.0777
ENSMUSG00000022528.7	Hes1	N/A		-1.10444	-0.845705	-0.202326	-0.211429	-1.62639	-1.74187	-1.51521	-1.78729	0.1326	0.6351	-0.0889454	0.0470324	-1.45236	-1.45236	-0.73385	-1.15766	2.29766	2.48052	2.02395	2.10684	1.06549	1.61177	0.694244	0.824641
ENSMUSG00000022132.15	Cldn10	N/A		-2.60245	-1.15499	-1.90526	-1.90526	-2.60245	-2.60245	-1.90526	-1.90526	-2.60245	-0.418021	-1.04277	-1.90526	-2.60245	-0.418021	-1.90526	-1.90526	4.3996	3.88941	3.76459	4.06576	3.30445	3.4098	2.86412	3.68515
ENSMUSG00000006800.14	Sulf2	N/A		1.62786	1.54558	1.40876	1.51751	1.75668	1.79319	1.34455	1.45675	0.438128	0.599323	0.748915	0.484881	0.733033	0.448994	1.00587	0.4711	-3.01339	-2.36132	-2.59531	-3.78899	-1.65928	-1.9088	-0.429422	-1.62461
ENSMUSG00000025936.15	RP23-278E1.2	N/A		-1.57621	-1.57621	-1.67221	-1.67221	-1.57621	-1.57621	-1.67221	-1.67221	-1.57621	-1.57621	-1.67221	-0.809715	-1.57621	-1.57621	-0.809715	-1.67221	4.49574	3.84088	4.02318	4.49407	1.98673	2.28629	0.190285	2.94517
ENSMUSG00000030930.14	Chst15	N/A		-0.736362	-1.26243	-0.872385	-0.942287	-0.633269	-0.49125	-1.72429	-1.00502	-1.04831	-1.03182	-1.18702	-0.768955	-1.1514	-0.936661	-0.280939	-0.630628	2.14899	2.04791	1.7463	2.42397	1.66104	1.43356	1.66131	1.57994
ENSMUSG00000046997.5	Spsb4	N/A		1.6161	1.18438	0.689663	0.782773	1.21755	1.43054	1.48321	1.64075	0.150437	0.217551	1.14032	0.827167	1.28168	1.24997	1.64075	1.39748	-4.10438	-4.10438	-4.07972	-3.21723	-0.541441	0.401975	-1.40987	-0.895299
ENSMUSG00000000489.7	Pdgfb	N/A		0.587209	0.49355	0.386861	0.199001	0.212813	0.265281	0.245999	0.208524	-2.22015	-1.30941	-0.754001	-2.08521	-2.40457	-2.05665	-1.68185	-2.18142	1.99087	2.03988	1.48023	1.60084	1.38866	1.01252	1.23672	1.3443
ENSMUSG00000039813.14	Tbc1d2	N/A		0.62981	0.679851	0.853772	0.548359	1.00178	1.05331	0.438735	1.06937	1.72026	1.67163	1.23155	0.79567	1.60844	1.45404	1.44819	1.27118	-2.60966	-2.45765	-2.22423	-2.39416	-1.97223	-2.77958	-1.00184	-2.0366
ENSMUSG00000046314.16	Stxbp6	N/A		1.60093	1.8217	1.41983	1.32264	1.45018	1.5563	1.50746	1.39684	0.473682	0.696857	0.923783	0.14636	0.569189	0.670776	0.589252	0.576211	-3.20768	-3.13897	-1.67541	-3.56293	-1.39531	-1.09763	-1.3739	-1.27015
ENSMUSG00000041936.18	Agrn	N/A		1.93654	1.6814	1.74554	1.77302	1.87327	1.65864	1.2835	1.86953	-0.341358	0.207007	0.515418	-0.657221	-0.0617409	-0.161276	0.336653	-0.173542	-2.04807	-1.77599	-1.53986	-2.25446	-1.82179	-1.14663	-1.1136	-1.78498
ENSMUSG00000029919.5	Hpgds	N/A		-2.62166	-1.75916	-2.99996	-2.99996	-2.62166	-2.62166	-2.99996	-2.99996	-1.1742	-2.62166	-1.13747	-1.55251	-2.62166	-2.62166	-0.815541	0.0324564	5.37526	4.81069	4.13866	3.92862	4.31765	4.1597	3.52074	3.8849
ENSMUSG00000025355.7	Mmp19	N/A		0.240919	0.368031	0.526312	0.54062	0.396714	0.887809	1.05424	0.862548	0.863356	1.35347	1.08386	1.6893	1.67949	2.08927	1.59647	1.83766	-2.78462	-2.68508	-2.12234	-3.70731	-1.32518	-1.08418	-2.06345	-1.29792
ENSMUSG00000018334.18	Ksr1	N/A		1.16596	0.830824	1.47464	1.02452	1.18878	1.30077	1.06393	1.38413	0.961528	0.45397	0.556744	0.95169	1.20166	0.843208	1.26519	0.724621	-4.02716	-3.36419	-4.14985	-2.61933	-0.152688	-0.402666	-0.40091	-1.27538
ENSMUSG00000025064.14	Col17a1	N/A		-2.36402	-2.36402	-2.46821	-2.46821	-2.36402	-0.501524	-2.46821	-2.46821	-0.916561	-0.501524	-0.283788	-1.02075	-1.50152	-2.36402	-1.60572	-0.283788	3.08344	3.6883	3.67969	3.46037	3.08344	3.02204	3.00899	2.91785
ENSMUSG00000028634.17	Hivep3	N/A		1.47133	1.21813	1.80334	1.75861	1.51518	1.48927	1.44235	1.38864	0.620924	-0.0181942	0.452596	-0.271659	0.426107	0.0283489	0.214371	0.357613	-1.55661	-2.4895	-2.01709	-2.0896	-0.867544	-1.83742	-1.34966	-1.68951
ENSMUSG00000029449.11	Rhof	N/A		-1.40829	-1.53382	-2.36612	-1.26658	-1.34939	-1.21189	-1.71404	-1.61888	-0.238362	-0.147759	-0.0966573	0.350089	-0.61821	0.0511446	-0.219277	0.0649314	1.93749	1.53813	1.57472	2.20807	1.47436	1.5066	1.43386	1.64989
ENSMUSG00000102418.1	Sh2d1b1	N/A		-1.55296	-1.97565	-1.32679	-1.42988	-1.84374	-1.73583	-1.54091	-1.36714	-0.385584	-0.0831585	-0.855642	0.391152	-0.437485	0.0358124	-0.799335	0.00900555	1.99724	2.41154	1.7948	2.09971	1.67066	1.89917	1.47915	1.54587
ENSMUSG00000039395.8	Mreg	N/A		-1.83518	-3.28264	-2.78905	-2.78905	-3.28264	-3.28264	-2.78905	-2.78905	-1.09821	0.667321	0.395373	-0.604627	-0.835179	-2.42014	-0.604627	-0.604627	4.64595	4.30096	3.8808	3.58124	3.33475	3.08765	2.39537	2.7173
ENSMUSG00000017002.14	Slpi	N/A		0.251849	-0.307578	0.374674	0.194102	0.0592046	0.663663	0.957062	0.382368	1.84537	1.68767	1.56925	1.99269	2.32714	2.10271	2.13384	2.35526	-3.38558	-2.74815	-2.7799	-2.52836	-0.748151	-1.74815	-2.64866	-2.0023
ENSMUSG00000016194.14	Hsd11b1	N/A		-2.3911	-2.61787	-2.13387	-2.31444	-2.61787	-2.28982	-1.53204	-2.41398	-0.259571	0.445925	-0.348506	0.709403	-0.218265	0.245392	-0.466447	0.408022	2.32539	2.99997	1.7317	2.66375	2.02476	2.35306	1.64161	2.05479
ENSMUSG00000069607.4	Cd300lh	N/A		-3.85147	-2.40401	-2.43437	-2.22792	-0.988971	-1.66704	-1.81288	-2.67538	-1.98897	-1.18162	-2.13481	-0.886882	-0.988971	-1.66704	-1.61125	-0.30192	4.38607	4.36418	3.35102	4.20281	2.97681	3.01103	3.02254	3.50905
ENSMUSG00000030474.9	Siglece	N/A		-1.58149	-2.02627	-1.45833	-1.1297	-1.52377	-1.1518	-1.04539	-1.29213	-0.283307	-0.618768	-1.09018	-0.0676079	-0.411561	-0.80388	-0.421067	-0.330002	2.52062	2.33079	1.63406	2.29158	1.69102	1.85841	1.48501	1.42375
ENSMUSG00000102051.1	RP23-458B6.6	N/A		1.49359	1.41746	1.2851	1.32097	1.19299	1.24397	1.37636	1.57419	2.01069	1.81686	1.88923	2.07795	2.14444	1.76754	2.31543	2.1129	-3.49299	-4.54744	-2.63433	-5.32621	-2.82161	-2.22551	-2.45679	-3.5348
ENSMUSG00000035283.4	Adrb1	N/A		-3.23156	-2.36906	-4.47429	-2.6118	-3.23156	-3.23156	-2.6118	-2.02684	-2.36906	-1.36906	-3.02684	-2.02684	-3.23156	-3.23156	-1.02684	-1.02684	6.22713	5.81582	4.69198	5.32189	5.59672	4.62529	4.19877	4.61942
ENSMUSG00000015568.16	Lpl	N/A		0.434921	0.767169	0.495959	0.606663	1.59477	1.80497	0.866962	1.42986	-1.43786	-0.680218	-0.578507	-1.20315	0.0837641	0.0536661	0.513554	0.533525	-2.90849	-2.46034	-2.2205	-2.48121	1.49653	1.2511	0.973145	1.06371
ENSMUSG00000114884.1	RP23-283G7.4	N/A		2.06985	2.02863	2.24128	1.82624	2.02863	1.70146	1.79767	0.908703	2.02863	1.00756	1.54613	1.47574	2.16803	1.8743	1.61325	1.24128	-3.94239	-3.94239	-3.70868	-3.70868	-3.0799	-3.94239	-3.70868	-1.52426
ENSMUSG00000024548.11	Setbp1	N/A		-0.22134	-0.146051	-1.31979	-0.441099	-0.706766	-1.0745	-1.06454	-1.22959	-1.27381	-1.0745	-0.689026	-0.391346	-2.02869	-2.44373	-2.57355	-1.63013	3.28872	2.8812	2.57776	3.12047	1.53355	1.26593	1.53979	2.10105
ENSMUSG00000024399.5	Ltb	N/A		-1.95218	-1.60426	-1.0659	-1.93263	-1.36722	-2.71118	-1.93263	-2.43513	-1.28233	-0.711175	-1.0201	0.0022707	-0.711175	-1.88805	-1.85017	-1.0659	3.84341	3.60936	3.05404	3.40407	2.21774	2.55705	2.15483	2.68726
ENSMUSG00000041540.16	Sox5	N/A		-2.44422	-2.44422	-2.49667	-2.49667	-2.44422	-2.44422	-2.49667	-2.49667	-1.58172	-2.44422	0.950788	-2.49667	-2.44422	-2.44422	-2.49667	-2.49667	4.59818	4.57815	3.68775	4.10729	4.98813	4.5268	4.33161	4.39925
ENSMUSG00000019256.17	Ahr	N/A		1.23952	1.51266	0.914727	1.42557	0.7623	1.0697	1.23764	0.776929	1.06769	0.938027	0.795156	0.853625	0.505233	0.706413	0.153696	0.597939	-2.03142	-2.31709	-1.61917	-2.04561	-2.09319	-1.35984	-1.9785	-1.112
ENSMUSG00000038415.10	Foxq1	N/A		2.73403	2.73403	1.11577	2.67216	2.90806	3.25599	3.23776	3.5361	-0.966406	-0.551368	0.613266	0.198228	-0.22944	-0.22944	-0.386734	0.350231	-2.41386	-2.41386	-2.83419	-2.83419	-2.41386	-2.41386	-2.83419	-2.83419
ENSMUSG00000037820.15	Tgm2	N/A		-0.852376	-1.21833	-1.08363	-1.31059	-1.33465	-2.43734	-2.13948	-2.89555	-1.61319	-0.768163	-1.32132	-0.393053	-2.61319	-2.08267	-1.07452	-1.52943	3.74045	3.68856	2.79809	3.70964	2.72005	2.77084	2.68473	2.55511
ENSMUSG00000054404.13	Slfn5	N/A		2.27886	2.21458	2.00265	2.12214	2.17166	2.27626	1.80087	2.24798	0.364947	0.957936	0.883291	0.270452	0.336756	0.66804	0.903372	0.447101	-3.41698	-3.08471	-2.74509	-4.65198	-2.46983	-2.29751	-1.2494	-2.0314
ENSMUSG00000078616.2	Trim30c	N/A		1.53917	1.58332	1.23936	1.46392	1.74752	1.71181	1.23936	1.83274	-0.28458	0.64142	0.244415	-0.00856543	-0.643034	0.309968	0.56836	-0.108102	-2.84097	-2.75851	-2.82799	-2.59353	-0.452702	-0.553397	-0.243031	-0.806932
ENSMUSG00000099974.1	Bcl2a1d	N/A		-0.990711	-1.03962	-1.02141	-1.63808	-1.99071	-0.943406	-1.02141	-1.45751	-1.57567	-2.09025	-0.960009	-1.37505	-1.72768	-1.31264	-2.54497	-0.844532	3.19251	3.15225	2.94287	2.87288	2.53703	2.7889	2.43231	2.6149
ENSMUSG00000037095.7	Lrg1	N/A		-4.92996	-4.92996	-4.91012	-4.91012	-4.92996	-4.92996	-2.46266	-4.91012	3.9549	3.76542	2.96919	4.92536	4.33554	4.59253	3.69047	4.87422	0.358798	-0.260112	0.707266	-1.58819	1.44033	1.53245	1.01847	0.596235
ENSMUSG00000037014.4	Sstr4	N/A		-0.331252	-0.96352	-0.630562	-0.837013	-2.47809	-1.70049	-1.95249	-2.53745	-0.378557	-0.331252	-0.289525	-0.367527	-0.826016	-1.37856	-0.145135	-1.53745	2.44926	2.52833	2.57107	2.50694	1.91422	1.49591	1.41674	1.8024
ENSMUSG00000040026.8	Saa3	N/A		-4.33816	-4.92313	-5.12013	-3.67956	-6.78562	-5.92313	-4.22705	-5.12013	2.45408	3.17622	2.31211	3.42731	3.22408	3.5627	2.83987	3.23175	1.77384	2.54855	1.87017	1.47765	2.07687	3.15369	2.5061	0.481903
ENSMUSG00000000915.15	Hip1r	N/A		-1.86721	-2.07666	-1.79138	-1.91424	-2.37622	-1.26931	-0.664623	-2.82113	-1.75473	-0.947377	-1.29757	-1.01377	-2.61723	-1.26931	-1.73366	-1.73366	4.14432	4.00682	3.4394	4.07571	3.12056	2.90633	2.61072	2.84421
ENSMUSG00000096054.3	Syne1	N/A		-1.75545	-1.06547	-0.897944	-1.45619	-2.24407	-1.40355	-0.595017	-2.0247	-0.956087	-0.64427	-0.643173	-0.773163	-1.37265	-0.867278	-1.36639	-1.37888	3.39081	3.22902	3.16499	3.12546	1.93515	1.75383	1.5537	1.29133
ENSMUSG00000054843.8	Atrnl1	N/A		1.12091	1.24308	1.51712	1.16152	1.00362	1.15998	1.29514	0.805476	0.670577	0.590599	0.626334	0.407678	0.792155	0.832021	0.465264	0.64768	-2.9573	-2.23928	-2.10721	-3.29276	-0.941704	-1.27466	-0.605438	-0.920794
ENSMUSG00000038540.14	Tmc3	N/A		-2.1682	-0.720739	-1.97513	-1.97513	-2.1682	-2.1682	-1.97513	-1.97513	-2.1682	-2.1682	-1.97513	-1.11264	-0.720739	-2.1682	-1.97513	-1.97513	5.04303	4.18615	3.8181	3.99589	2.94223	2.27926	3.74535	3.37922
ENSMUSG00000001348.15	Acp5	N/A		-1.83949	-3.02391	-2.18496	-2.49642	-2.55734	-2.76088	-1.98881	-3.5139	-0.839487	0.00208378	-0.716638	0.610343	-0.74999	-0.501491	-0.359703	-0.249405	3.04921	3.28683	2.5063	3.18586	2.84757	3.08689	2.6209	2.58644
ENSMUSG00000034765.6	Dusp5	N/A		-0.979106	-0.653467	-1.15862	-0.824016	-1.84329	-1.39208	-1.48453	-2.08621	-0.960649	-0.160297	-0.598622	0.133298	-1.46825	-1.34345	-0.96531	-1.36344	2.10361	2.83839	2.33653	2.819	1.64254	2.21605	1.55077	1.64114
ENSMUSG00000026581.14	Sell	N/A		2.04666	2.12863	1.76847	1.83559	1.90632	2.34107	1.76621	1.80507	1.68166	1.85173	1.31796	1.47828	1.8938	2.12936	1.84484	1.64612	-4.85254	-5.45293	-3.18505	-5.28659	-3.27785	-2.3959	-1.71926	-3.27164
ENSMUSG00000030413.7	Pglyrp1	N/A		-1.18838	-1.86646	-1.62199	-1.64798	-1.20232	-1.66001	-1.87475	-1.44066	-0.483683	-0.123953	-0.207756	0.395616	-0.566896	-0.147358	-0.0917215	0.0300884	2.1651	1.95274	1.7868	2.19408	1.50027	1.62095	1.02804	1.45024
ENSMUSG00000023830.13	Igf2r	N/A		-3.50189	-2.77606	-2.40288	-4.75652	-3.20233	-2.9544	-3.17156	-2.88205	-0.0782061	0.336831	0.213107	0.995396	0.313372	0.293528	0.238462	0.906445	2.97509	2.67112	2.90249	2.96078	2.90489	3.01805	2.18469	2.81165
ENSMUSG00000025007.13	Aldh18a1	N/A		-1.14044	-1.42317	-1.57666	-1.79347	-1.97869	-1.42317	-1.24804	-1.73614	-0.571872	0.266936	-0.0721889	0.472808	-0.765695	-0.813629	-0.602046	-0.275005	2.38099	2.31454	1.92189	2.11472	1.62077	1.53342	1.2521	1.54204
ENSMUSG00000027624.19	Epb41l1	N/A		-1.02047	-1.08758	-1.21879	-1.44909	-0.761079	-0.689821	-1.10513	-1.4216	-2.89493	-1.60543	-1.56456	-1.59494	-0.99877	-1.20688	-0.394638	-0.673791	1.90381	2.08743	1.47983	2.16789	3.26045	3.01329	2.94851	2.82632
ENSMUSG00000040552.8	C3ar1	N/A		-2.35652	-2.52253	-1.92127	-1.35298	-0.487761	-0.531351	-0.908884	-0.448332	-2.17964	-1.55815	-1.82505	-1.58942	-0.295116	-0.145369	0.313509	0.492215	1.09434	1.0477	0.0472999	0.385658	3.94488	3.98951	3.27874	3.52852
ENSMUSG00000026389.16	Steap3	N/A		0.270844	0.370379	0.263499	0.406756	1.20045	0.889753	1.05032	0.884987	0.599626	0.585886	0.55012	0.355617	0.955342	0.767269	1.19033	0.925629	-4.31412	-2.87355	-3.3374	-3.07437	1.10735	0.440768	0.377756	0.406756
ENSMUSG00000052212.6	Cd177	N/A		2.37022	2.30828	2.46829	2.43303	2.52968	2.45445	2.32552	2.53163	1.19041	0.826265	1.16237	1.00943	1.68754	1.25223	1.98476	1.76192	-3.80859	-5.84101	-3.42728	-5.25736	-2.16089	-2.80859	-3.23746	-3.75486
ENSMUSG00000026548.4	Slamf9	N/A		-2.40865	-2.12854	-1.65161	-3.48811	-0.968076	-1.57215	-1.208	-1.7105	-2.12854	-1.63104	-2.48811	-1.34127	-0.930601	-0.823686	-0.229374	-0.105639	2.00317	2.15468	1.69322	2.62935	4.46084	3.97258	3.93576	3.96428
ENSMUSG00000074813.13	RP23-249P4.1	N/A		1.61033	1.20035	1.23581	1.27866	1.11729	1.53233	1.25739	1.12274	1.56404	1.12794	0.808634	1.32028	0.532331	0.754723	0.818349	0.818349	-1.7896	-2.95952	-2.07889	-2.81586	-2.63759	-2.05263	-1.75696	-2.0085
ENSMUSG00000060044.8	Tmem26	N/A		0.250628	0.511495	-0.175726	0.0685101	0.543675	0.224397	0.149	0.356942	-2.22186	-3.37386	-1.77476	-2.46991	-2.37386	-2.95882	-2.16179	-3.05487	2.77589	2.73001	2.38095	3.12219	1.83992	2.0524	1.44155	2.11791
ENSMUSG00000004609.11	Cd33	N/A		0.860351	0.858422	1.03506	0.872005	0.640203	1.24964	0.995185	0.879034	1.5112	0.999779	0.764141	1.62787	1.77811	1.58182	0.9273	1.46107	-3.16491	-3.73428	-2.53893	-3.16186	-1.11104	-1.4693	-1.27433	-1.58655
ENSMUSG00000026478.14	Lamc1	N/A		-2.48442	-2.37097	-1.93924	-1.87395	-2.89074	-2.14684	-2.31909	-2.54438	0.952175	0.845353	0.382685	1.43128	1.20589	1.29551	0.911348	1.58548	1.59995	1.12008	1.47579	0.962294	1.52049	1.35352	0.987107	0.940681
ENSMUSG00000060600.15	Eno3	N/A		-1.54302	-1.30136	-2.08373	-2.48762	-1.7725	-2.49298	-2.5558	-2.24321	-1.28707	-0.405515	-0.266819	0.340194	-2.17105	-1.82313	-1.01814	-1.41196	3.65238	3.70781	3.29495	3.35902	2.691	2.74543	2.57083	2.50228
ENSMUSG00000031385.14	Plxnb3	N/A		-1.46944	-1.46944	-0.150543	-1.33275	-1.84141	-1.40531	-1.17521	-1.86326	-2.60694	-2.22843	-1.71126	-2.1263	-0.799589	-0.928872	-1.57375	-1.07899	3.38401	3.43526	2.52524	3.38044	3.07113	2.85903	2.38467	2.7217
ENSMUSG00000040640.11	Erc2	N/A		-2.66455	-2.66455	-3.3742	-3.3742	-2.66455	-2.66455	-3.3742	-3.3742	0.657376	0.00529933	1.29565	0.295651	0.00529933	-0.480128	-0.0522718	0.295651	2.95283	2.59026	3.40716	1.94773	2.51987	2.4074	3.14651	3.16072
ENSMUSG00000071984.10	Fndc1	N/A		-1.73716	-1.73716	-1.58494	-1.58494	-1.73716	-1.73716	-1.58494	-1.58494	-1.73716	-1.73716	-1.58494	-1.58494	-1.73716	-1.73716	-1.58494	-1.58494	3.82578	4.19143	2.27756	4.29993	2.29527	3.58477	2.73699	3.36502
ENSMUSG00000026536.9	Mnda	N/A		2.04789	1.96368	1.74801	1.82554	1.92121	2.09792	1.6262	1.98012	0.0806923	0.385973	0.712692	-0.0185843	-0.0527906	0.269137	0.946147	0.34456	-2.77673	-2.10272	-2.3771	-3.05783	-1.93054	-1.90374	-1.41737	-2.3124
ENSMUSG00000049103.14	Ccr2	N/A		1.14393	1.13001	1.19723	1.26395	1.53287	1.83387	1.45665	1.6063	0.63467	0.615668	0.626678	0.734056	0.986325	1.07293	1.22774	1.32016	-4.19222	-3.78093	-3.02745	-5.0673	-0.488791	-0.488332	-0.458836	-0.879199
ENSMUSG00000079227.10	Ccr5	N/A		-1.33884	-1.11522	-1.63456	-0.924816	-0.148899	-0.1718	-0.376027	-0.246744	-0.250871	0.351595	-0.0814066	0.563552	0.691081	1.5372	0.862377	1.35019	-2.63508	-2.13758	-2.76132	-2.00099	2.43417	2.78426	2.55766	2.69208
ENSMUSG00000075254.11	Heg1	N/A		-0.808302	-1.09852	-1.11997	-1.3134	-0.6563	-1.41653	-1.59283	-1.19022	-1.26982	-0.666724	-0.538668	-0.586186	-1.79681	-1.55169	-0.801335	-1.57769	2.8282	2.55932	2.30808	2.56808	2.0728	1.80439	1.98274	1.8614
ENSMUSG00000045551.7	Fpr1	N/A		-3.97382	-4.33639	-2.79094	-3.89048	-2.38886	-3.05628	-3.3759	-2.89048	0.160037	-0.224881	0.122348	0.785985	0.975197	1.08988	0.511623	1.806	2.8883	2.48196	1.87582	2.61958	3.16118	3.22367	2.68587	2.54057
ENSMUSG00000029915.14	Clec5a	N/A		2.08247	1.99216	2.08711	1.59534	1.91167	2.5071	1.78938	1.64993	2.05775	1.50449	1.38832	1.8528	1.52525	2.02532	1.72303	2.05241	-5.01907	-6.46653	-5.00829	-4.20093	-1.51657	-2.60403	-2.00829	-2.92082
ENSMUSG00000000440.12	Pparg	N/A		-1.67008	-1.35769	-1.87836	-1.61533	-0.811548	-1.21209	-1.60203	-1.66978	-1.92994	-1.30751	-1.02149	-0.719164	-1.85594	-1.1555	-1.08481	-0.854516	3.0653	3.263	2.47919	3.16019	2.506	2.46599	2.27093	2.53517
ENSMUSG00000042351.9	Grap2	N/A		-1.27277	-1.00484	-1.41247	-1.49736	-1.30252	-0.668315	-1.39201	-1.39201	-0.737737	-0.512445	-0.247137	-0.475667	-0.956747	-0.737737	-1.14944	-1.0499	2.19333	2.16644	2.05816	2.29113	1.3699	1.46345	2.08395	2.18276
ENSMUSG00000042659.15	Arrdc4	N/A		1.18183	1.56824	1.00232	1.40923	1.29095	1.4905	1.4691	1.27012	0.410094	0.34164	0.277355	0.442693	0.818077	0.80743	0.473602	0.618935	-2.87707	-2.65468	-2.0343	-1.89773	-1.4114	-0.965605	-1.5228	-1.50852
ENSMUSG00000064147.6	Rab44	N/A		2.05999	1.99671	2.49188	2.14987	1.7948	1.96257	2.20727	1.66763	2.08666	1.04375	1.48978	1.18146	1.74209	1.50169	1.31089	1.17624	-3.09921	-3.30566	-3.76236	-2.17739	-3.09921	-4.68417	-4.12493	-3.61035
ENSMUSG00000057329.7	Bcl2	N/A		-0.756979	-0.661295	-1.09228	-1.10867	-1.3627	-1.86834	-2.02072	-1.46185	-0.850638	-0.307323	-0.5046	-0.180503	-2.96026	-1.71634	-1.52646	-1.75253	3.19908	3.33194	2.83619	3.10501	2.0037	1.94916	1.7496	1.9568
ENSMUSG00000048031.15	Fcrl5	N/A		-4.7469	-4.7469	-4.96145	-4.96145	-4.7469	-4.7469	-4.96145	-4.96145	-1.56247	-0.240544	-1.2916	0.222972	-3.8844	-0.562472	-0.777028	-0.513993	6.73261	6.81864	5.36967	6.36252	5.75765	5.92858	5.17134	5.30192
ENSMUSG00000022584.14	Ly6c2	N/A		2.53172	2.2634	1.90877	2.1254	2.47197	2.38794	1.95315	2.38193	2.11118	2.14983	1.91433	1.87491	2.05148	1.96926	2.46991	1.93021	-4.99349	-5.65645	-4.16782	-5.44345	-3.56899	-3.71785	-2.11395	-4.8334
ENSMUSG00000045671.17	Spred2	N/A		-1.19976	-1.32078	-1.90724	-1.38368	-1.18328	-0.928462	-1.22542	-1.2068	-1.39478	-0.901241	-1.58532	-0.436924	-1.78473	-1.13491	-0.833995	-1.36292	2.92239	2.96924	2.53016	3.08144	1.94975	2.00655	2.08144	2.24926
ENSMUSG00000048498.7	Cd300e	N/A		-3.99511	-4.18776	-2.14701	-4.44247	-5.99511	-6.85761	-5.9019	-7.76439	-1.13713	0.746352	0.0169663	1.30023	-1.3804	-0.655265	-0.782956	-0.402051	6.17497	6.40283	5.22077	5.67139	5.34946	5.5348	4.52437	4.70705
ENSMUSG00000032652.13	Crebl2	N/A		-0.857482	-0.93225	-0.765778	-0.88404	-0.75213	-1.42075	-1.11127	-1.03685	-1.03563	-1.08596	-0.607776	-0.45997	-0.850214	-0.879508	-0.973771	-1.20778	2.41629	2.4057	1.83579	2.55615	1.35079	1.64116	1.29792	1.35739
ENSMUSG00000055541.17	Lair1	N/A		-1.0505	-1.61787	-1.57218	-1.52949	-1.40488	-2.03729	-1.65235	-2.54216	-0.248213	0.0734615	0.077734	0.311716	-0.739233	-0.553739	-0.487007	-0.369411	2.21318	2.27607	2.33269	2.3376	1.51777	1.57124	1.41368	1.67917
ENSMUSG00000030789.9	Itgax	N/A		-0.7046	-0.69211	-1.13418	-1.61223	-1.90623	-1.34064	-1.68262	-2.05035	-1.6432	-1.02653	-1.17165	-0.620839	-2.02653	-2.74274	-1.64699	-2.41958	3.51667	3.64836	2.94163	3.53122	2.38949	2.52806	2.89859	2.967
ENSMUSG00000029084.5	Cd38	N/A		-5.19937	-5.19937	-4.96642	-4.96642	-5.19937	-3.75191	-4.96642	-4.96642	2.85295	2.61732	1.16286	3.73213	1.44449	2.35662	2.13448	2.74783	2.82803	2.79755	2.15346	3.00982	2.13886	2.31418	2.56141	2.36368
ENSMUSG00000024985.18	Tcf7l2	N/A		-0.669568	-1.36094	-1.39364	-1.74081	-1.40433	-2.11582	-1.74081	-1.81704	-0.922053	-0.156982	-0.266028	-0.120912	-1.70983	-1.24793	-1.16293	-1.37706	2.84823	2.71643	2.52543	2.85735	2.0114	2.0114	2.02582	2.21065
ENSMUSG00000071723.7	Gspt2	N/A		1.45836	1.58085	1.3696	1.31549	1.35426	1.68597	1.33376	1.68621	0.855023	1.10878	0.815289	0.575461	0.580848	0.458364	0.815289	0.528667	-2.67549	-1.84542	-1.6572	-1.7312	-2.03806	-2.52349	-2.39416	-2.6572
ENSMUSG00000019843.14	Fyn	N/A		-1.65381	-1.49452	-1.90353	-1.54837	-1.14721	-1.80794	-1.83856	-1.3542	-0.456609	0.178741	0.0738068	0.253736	-0.759264	-0.15281	-0.354197	-0.498797	1.9941	2.06267	1.88866	2.02765	1.56061	1.67604	1.58021	1.67359
ENSMUSG00000039109.16	F13a1	N/A		2.0822	2.24124	1.92051	1.89606	2.06438	2.41805	1.94859	1.95508	1.77601	1.74549	1.57431	1.67753	1.98472	2.05757	1.98355	1.8124	-6.33523	-6.27553	-4.09711	-6.004	-1.70855	-2.05035	-1.97278	-2.69415
ENSMUSG00000016496.7	Cd274	N/A		-0.573421	-1.46931	-1.51306	-1.34956	-1.99173	-1.28124	-1.74187	-1.85923	-0.56364	-0.33015	-0.438094	-0.50347	-1.62335	-1.99173	-1.09802	-1.26614	3.00498	2.93857	2.78267	2.94463	2.0598	1.82123	1.79534	2.24681
ENSMUSG00000033066.15	Gas7	N/A		1.22939	1.06052	1.28844	1.28427	1.52013	1.65322	1.49885	1.17274	1.06319	0.767838	0.766584	0.640898	1.16455	1.02776	1.36514	1.09431	-5.1817	-5.21084	-3.77631	-5.56391	0.560309	0.345624	0.250791	-0.0217953
ENSMUSG00000021614.16	Vcan	N/A		0.237868	0.289458	0.744806	0.702218	0.430372	0.73801	1.14621	0.208606	2.38946	2.19666	2.07831	2.65576	2.77611	2.94816	2.22395	2.92843	-4.81524	-5.55221	-4.26108	-5.25168	-0.859025	-0.779619	-1.98125	-1.19428
ENSMUSG00000059089.4	Fcgr4	N/A		-2.30557	-2.87673	-2.63407	-2.46603	-1.9892	-2.8261	-2.79553	-2.44355	-1.31951	-0.534335	-0.714787	0.0871086	-1.01166	-0.734548	-0.50043	-0.596378	3.75242	3.79792	3.00519	3.97934	2.9614	3.08592	2.45439	2.62476
ENSMUSG00000034842.16	Art3	N/A		-1.88354	-2.74604	-2.8364	-2.8364	-2.74604	-2.74604	-2.8364	-2.8364	-2.74604	-2.74604	-1.9739	-0.388936	-2.74604	-1.88354	-2.8364	-2.8364	5.54691	5.67488	5.41842	5.73691	4.42934	4.59219	3.74035	4.48553
ENSMUSG00000041797.7	Abca9	N/A		1.65085	1.66138	1.5729	1.59035	1.73976	1.89777	1.44927	1.38343	-0.394863	-0.332877	-0.0674582	-0.728583	-0.232622	-0.257999	-0.0259695	-0.460566	-2.60186	-2.37946	-1.90351	-2.17559	-0.471459	-0.278628	-0.260856	-0.373427
ENSMUSG00000034641.2	Cd300ld	N/A		-1.76211	-1.83921	-1.83336	-1.70021	-1.21344	-1.38875	-1.45432	-1.58406	-1.1286	-0.43653	-0.720302	-0.0554075	-0.569589	-0.378609	-0.348419	-0.022296	2.12531	2.33902	2.00559	2.16176	2.06797	2.18454	1.7884	1.76262
ENSMUSG00000060429.12	Sntb1	N/A		1.48455	1.40369	1.34581	1.32172	1.19808	1.59317	1.11993	1.25011	0.780258	0.62143	0.8562	0.554057	0.824145	1.07633	1.16125	0.885262	-2.84423	-2.84423	-1.9851	-2.81518	-1.91462	-1.37857	-1.61587	-2.07821
ENSMUSG00000027435.8	Cd93	N/A		1.27515	1.34785	1.1061	1.28258	1.20903	1.35257	1.00373	1.01963	1.83672	1.74478	1.66888	1.97192	2.10939	1.71659	1.55197	1.58192	-3.46108	-4.09851	-2.98037	-3.6703	-2.31424	-2.71824	-1.61358	-2.92249
ENSMUSG00000030203.17	Dusp16	N/A		-2.28013	-2.49201	-2.42507	-3.22154	-2.66499	-2.72121	-2.44267	-3.17669	-0.527069	-0.410789	-0.367229	0.751636	-1.72121	-0.864214	-1.81412	-0.921031	3.92475	3.85447	3.80269	4.10219	2.81641	3.08598	2.62038	3.09144
ENSMUSG00000026579.8	F5	N/A		0.895061	0.934712	1.15284	1.12136	0.8496	0.973303	1.18366	1.05436	1.4296	1.23957	1.03344	1.28741	1.87097	1.80185	1.45929	1.89731	-3.82832	-3.80842	-3.04257	-3.35378	-1.23006	-1.12788	-2.21992	-1.57339
ENSMUSG00000026657.16	Frmd4a	N/A		1.85697	1.83424	1.70923	1.57294	1.64708	1.75269	1.34892	1.58518	-0.0855408	0.0936022	0.0218973	-0.587287	-0.0665922	0.0245905	0.103609	-0.158574	-2.23909	-2.17127	-1.88649	-1.83665	-1.23139	-1.41529	-0.878066	-0.994711
ENSMUSG00000044749.13	Abca6	N/A		1.89224	2.21188	1.93062	1.78801	2.1158	2.20269	1.70445	1.85115	0.613769	0.255722	0.70003	0.390221	0.910105	0.528039	0.480585	0.589706	-3.50171	-3.89403	-3.06374	-4.06374	-1.59024	-1.74428	-0.828519	-1.47877
ENSMUSG00000026193.15	Fn1	N/A		0.914033	0.965638	1.30248	1.15092	1.13308	1.27808	1.24995	1.07088	1.23255	0.913505	1.15406	1.1003	1.73036	1.36997	1.54981	1.62501	-3.87358	-4.74829	-3.83957	-4.29097	-0.00201893	-0.913359	-1.20129	-0.871569
ENSMUSG00000041488.16	Stx3	N/A		1.37944	1.26498	1.17072	1.00686	1.22301	1.35477	1.24617	1.15488	1.15501	1.07988	1.00096	0.954444	1.25168	1.02427	1.07297	0.971123	-2.77529	-3.01135	-2.01239	-2.70243	-2.37392	-1.57247	-1.96547	-1.89783
ENSMUSG00000029254.16	Stap1	N/A		-0.684567	-0.908515	-0.974963	-0.834459	-0.829081	-1.19018	-1.34163	-1.33314	-0.916704	-0.785935	-0.495844	-0.500592	-1.02467	-0.83683	-1.33314	-0.732263	2.19107	2.1955	2.17078	2.20204	1.34313	1.44678	1.40482	1.76838
ENSMUSG00000029553.10	Tfec	N/A		2.42326	1.87136	2.0699	2.35595	1.8991	2.25095	1.90944	1.62933	2.95964	2.44224	1.89522	2.17952	2.47948	2.38453	2.1439	2.45618	-4.67764	-4.67764	-4.62549	-2.76299	-4.67764	-4.67764	-4.62549	-4.62549
ENSMUSG00000020717.19	Pecam1	N/A		-1.91728	-2.1474	-2.48933	-2.17248	-2.72694	-1.93589	-2.51487	-2.14231	-2.3447	-1.47476	-1.33354	-0.786947	-2.48843	-1.67912	-1.42741	-1.92134	4.55763	4.54132	3.83228	4.34367	3.71413	3.90143	3.23428	3.378
ENSMUSG00000069515.6	Lyz1	N/A		-0.435173	-0.464202	-1.08166	-0.958272	2.44503	2.38526	1.8617	2.19912	-2.0144	-1.86756	-1.4378	-1.64108	0.957418	0.968323	1.65788	1.73852	-3.45252	-3.45252	-3.56708	-3.30405	2.8879	2.04243	2.22082	2.31189
ENSMUSG00000060147.15	Serpinb6a	N/A		-1.55292	-1.73813	-1.96813	-1.90584	-1.66117	-1.81943	-1.77019	-1.2227	-1.45222	-0.840495	-1.57985	-0.770186	-1.55292	-1.3888	-1.26117	-0.733661	2.94933	3.11985	2.65091	3.24648	2.88903	3.04789	2.49034	2.82399
ENSMUSG00000070369.13	Itgad	N/A		-1.70826	-1.70826	-1.70995	-1.70995	-1.70826	-1.70826	-1.70995	-1.70995	-1.70826	-1.70826	-1.70995	-0.847455	-1.70826	-1.70826	-1.70995	-1.70995	4.01222	3.5805	2.9599	4.17491	3.01222	3.06113	2.40047	3.28183
ENSMUSG00000025044.16	Msr1	N/A		1.53534	1.51426	1.52277	1.64494	1.62919	1.73077	1.52351	1.62665	0.174162	0.354207	0.519105	0.499879	0.620665	0.565712	0.911563	1.09128	-3.54795	-3.12113	-3.21102	-3.17255	-0.806257	-0.64896	-1.46047	-1.49566
ENSMUSG00000005800.3	Mmp8	N/A		0.982271	1.13013	1.49808	1.19934	0.679266	1.43612	1.48403	1.20594	2.19016	2.13461	2.21381	2.94553	2.45653	2.56502	2.62754	2.77546	-4.1993	-4.53633	-4.57017	-4.36853	-2.35799	-2.48048	-3.76281	-3.24824
ENSMUSG00000051748.2	Wfdc21	N/A		-4.78826	-4.78826	-5.14456	-5.14456	-4.78826	-4.78826	-5.14456	-5.14456	3.50887	3.52132	3.26868	4.90157	3.96906	4.06576	3.84206	5.0137	0.466557	-0.603833	0.984722	0.0398636	2.07424	2.15105	1.20979	1.31785
ENSMUSG00000023809.9	Rps6ka2	N/A		-2.37071	-2.24941	-2.71758	-2.43748	-1.97479	-2.81129	-2.40946	-2.27701	-0.760661	-0.327087	-0.52494	0.328889	-0.974786	-0.819901	-0.487851	-0.517446	3.27819	3.30568	2.98747	3.29577	2.80902	2.89574	2.17781	2.58184
ENSMUSG00000042284.10	Itga1	N/A		1.80752	1.98431	1.85923	1.68087	1.36267	1.42601	1.92967	1.80557	1.55419	1.03999	1.52727	0.950879	1.45456	1.44178	1.12973	1.11999	-3.37129	-2.86879	-3.67117	-3.54189	-2.81329	-3.01765	-2.16338	-2.62678
ENSMUSG00000039735.15	Fnbp1l	N/A		-2.63503	-2.21999	-1.99768	-1.52125	-1.48303	-1.67567	-1.87739	-2.19932	-1.5955	-1.41264	-1.39196	-0.906536	-1.19025	-1.25037	-1.52125	-0.936283	3.34606	3.05923	2.79164	3.05051	3.44534	3.61184	3.10446	3.40505
ENSMUSG00000031391.18	L1cam	N/A		-1.1288	-1.27766	-1.53755	-1.59211	-1.51246	-1.17585	-1.60764	-1.5983	-0.931982	-0.542979	-0.305838	-0.260944	-1.13653	-0.909718	-0.953578	-1.16937	2.73582	2.61433	2.55602	2.82399	1.52439	1.74146	1.68686	1.95846
ENSMUSG00000041757.16	Plekha6	N/A		-1.64374	-2.02707	-2.04924	-1.80413	-2.64374	-2.38071	-2.4822	-2.6342	0.135866	0.163611	-0.0492406	0.562194	-0.44211	-0.850195	-0.446576	-0.738039	3.30579	2.83091	3.2043	2.72139	2.03057	1.52083	1.6997	2.01605
ENSMUSG00000042700.16	Sipa1l1	N/A		-1.76455	-1.4735	-1.34306	-1.5021	-1.66879	-1.81932	-1.62664	-1.58297	-0.953156	-0.847507	-0.964925	-0.376229	-0.886993	-0.443749	-0.863894	-0.585838	2.79904	2.41103	2.26996	2.51123	2.35126	2.29622	1.99433	2.07015
ENSMUSG00000003617.16	Cp	N/A		-3.41531	-5.27781	-5.01157	-5.01157	-5.27781	-5.27781	-5.01157	-5.01157	0.0765429	-0.245385	-0.625515	0.708904	-0.955879	-0.327847	0.208475	0.172851	5.58961	5.53452	5.06038	5.43306	4.74456	4.83262	4.57544	4.5127
