# Supplementary material for: Notch and TLR signaling coordinate monocyte cell fate and inflammation
Source: eLife. 2020 Jul 29;9:e57007. doi: 10.7554/eLife.57007 (PMC7413669; doi:10.7554/eLife.57007)
Supplement: Figure 4—source data 2. [file elife-57007-fig4-data2.xlsx]

## Sheet: 373 DEGs Lowt+A vs Loko+A
gene_name	GENE_NAME	Description		wt1	wt2	wt3	wt4	ko1	ko2	ko3	ko4
RP24-93F24.2	RP24-93F24.2	na		1.48198	0.717611	1.10041	0.333298	-0.427819	-1.77177	-0.975251	-0.45846
RP24-80F7.5	RP24-80F7.5	na		-0.919332	-0.997334	0.00991821	-2.11936	0.855108	1.06156	0.925029	1.18442
Akr7a5	AKR7A5	na		-0.755604	-0.374514	-0.147766	-0.286742	0.625486	0.504632	0.31434	0.120168
Csrp1	CSRP1	na		-0.105728	-0.752091	-0.60104	-0.285013	0.339056	0.518763	0.726765	0.159289
Ppnr	PPNR	na		1.16102	0.885236	0.607725	0.37772	-0.602865	-1.44339	-0.903236	-0.0822067
Lxn	LXN	na		-0.436295	-0.358292	-0.232261	-0.726075	0.00849009	0.786098	0.504705	0.453631
Thbs3	THBS3	na		-0.265508	-0.665595	-0.0394211	-0.756173	0.665229	0.265874	0.358338	0.437256
RP23-50E10.4	RP23-50E10.4	na		-0.165741	-1.7507	-0.681773	-2.20533	1.41922	0.497224	1.36452	1.52259
Ctsl	CTSL	na		-0.847472	-0.879893	-0.786165	-0.0112925	0.574109	1.15326	0.35856	0.438901
Jup	JUP	na		0.483171	0.435223	0.137771	0.665282	-0.110392	-0.808003	-0.517095	-0.285958
Nacad	NACAD	na		1.31283	0.897789	-0.0339274	1.288	-1.37905	-0.831563	-0.864002	-0.390071
RP23-191E3.18	RP23-191E3.18	na		0.666299	0.447289	1.00025	0.384911	-0.839592	-0.273995	-1.16968	-0.215482
Ccr1	CCR1	na		-1.57398	-2.05941	0.0695617	-3.69983	1.88545	1.74794	1.94403	1.68623
Rnf149	RNF149	na		0.215988	0.507053	0.465626	0.352454	-0.700152	-0.0228901	-0.555298	-0.26278
Cd5l	CD5L	na		-4.42839	-0.565891	-3.35059	-0.765628	2.65328	2.341	1.94953	2.16669
RP23-361M12.2	RP23-361M12.2	na		0.90664	0.284657	0.646374	0.0931358	-0.428198	-0.763102	-0.370984	-0.368526
H2-Q6	H2-Q6	na		0.33214	0.713062	0.00977516	0.610168	-0.624608	-0.420593	-0.235785	-0.384159
Ttyh2	TTYH2	na		-0.869155	-0.217079	-0.374019	-1.20409	0.888275	0.197959	0.648349	0.929762
Kcnj2	KCNJ2	na		0.757654	0.787677	0.100159	0.553251	-1.0413	-0.504032	-0.371423	-0.281988
Idh2	IDH2	na		-0.477797	-0.22116	-0.0528016	-0.722653	0.345881	0.353076	0.509077	0.266376
C1rl	C1RL	na		-0.477004	-0.499724	-0.535826	0.0344896	0.453733	0.522996	0.326671	0.174667
RP24-497G20.1	RP24-497G20.1	na		-0.834872	-1.64223	-0.367905	-1.10487	1.16513	1.31197	0.0471325	1.42564
RP23-91K11.3	RP23-91K11.3	na		0.31821	0.562629	0.191267	0.641928	-0.534233	-0.346606	-0.761428	-0.0717678
RP23-395G18.1	RP23-395G18.1	na		1.87838	0.844433	0.563945	1.02467	-0.660359	-2.06246	-1.09427	-0.494354
Apex1	APEX1	na		-1.09676	-0.0712228	-0.605889	-0.419476	0.399668	0.768312	0.466867	0.558498
Ipo4	IPO4	na		-0.316497	-0.123853	-0.463544	-0.726579	0.291185	0.149166	0.566203	0.623919
Vmac	VMAC	na		0.100429	0.828349	0.451292	0.523442	-0.729646	-0.199132	-0.664185	-0.310548
Cdc25b	CDC25B	na		-0.203445	-0.881517	-0.450479	-0.56151	0.551442	0.53352	0.913575	0.0984144
S1pr1	S1PR1	na		-0.994564	-1.43066	-0.115584	-0.874576	1.03646	1.38876	0.355721	0.634438
Dapk1	DAPK1	na		-0.918715	-1.10775	0.0475316	-1.58128	1.02318	1.00328	1.05614	0.477609
Tlr9	TLR9	na		-0.213717	-0.481752	-0.356825	-0.721821	0.339277	0.356191	0.875235	0.203411
Oscp1	OSCP1	na		1.26472	0.849686	1.81847	0.323704	-1.0572	-1.0572	-1.8138	-0.328373
Cd200r1	CD200R1	na		-0.569149	-2.89108	-0.612577	-1.80522	1.63248	1.82774	1.67282	0.744975
Raph1	RAPH1	na		-0.277448	-0.48758	-0.108625	-0.904306	0.506124	0.258905	0.523162	0.489772
Ggct	GGCT	na		0.302333	0.748006	0.468111	0.155589	-0.629032	-0.421306	-0.523526	-0.100173
Efcab9	EFCAB9	na		0.518997	0.613119	0.372556	0.127444	-0.497305	-0.634809	-0.0424814	-0.457519
C4b	C4B	na		-1.53322	-1.45767	0.0473557	-1.88601	1.70241	1.28847	1.28725	0.551398
C1qa	C1QA	na		-1.32176	-2.70028	-4.92511	-0.670292	2.23046	1.79158	2.60273	2.99267
Slc2a3	SLC2A3	na		-0.835341	-0.342301	-1.03959	-0.516031	0.053627	1.12402	0.688327	0.867298
Pafah1b3	PAFAH1B3	na		-0.275524	-0.275524	-0.121101	-0.517029	0.209903	0.341147	0.520445	0.117686
Timp2	TIMP2	na		-1.59497	-0.594975	-0.19176	-1.12955	0.808381	1.38157	0.578083	0.743219
Tmem154	TMEM154	na		-3.00396	-1.14147	-0.318211	-3.25681	1.55897	2.58645	2.28751	1.28751
Rgs18	RGS18	na		-0.536154	-0.55785	-0.622777	-1.3965	0.420124	0.673881	1.46308	0.556194
RP23-250D22.2	RP23-250D22.2	na		0.477619	0.532761	0.934274	0.245476	-0.744773	-0.265605	-0.913723	-0.266025
Ear2	EAR2	na		0.31279	0.396574	0.19489	0.69863	-0.252599	-0.456765	-0.711886	-0.181636
Klrg2	KLRG2	na		-0.843088	-2.06548	-0.679911	-3.54241	1.34956	1.55901	2.50991	1.71241
Ckap4	CKAP4	na		-0.987741	-0.519961	-0.0384455	-0.803691	0.626164	0.881537	0.385257	0.45688
G0s2	G0S2	na		0.237771	0.50479	0.262119	0.828625	-0.485294	-0.257267	-0.787633	-0.303111
RP23-471B6.6	RP23-471B6.6	na		1.02991	0.205483	0.560656	0.354205	-0.379479	-0.855917	-0.346235	-0.568627
Rpl3l	RPL3L	na		0.514412	1.05873	0.440297	0.288294	-0.546988	-1.02616	-0.384616	-0.343974
Ada	ADA	na		-1.07927	-0.256143	-0.561639	-0.76809	1.02765	0.307758	0.990902	0.338826
RP24-298J16.4	RP24-298J16.4	na		-0.145997	-0.539661	-0.243814	-0.540796	0.197305	0.488354	0.596708	0.187902
Acsl3	ACSL3	na		-0.361873	-0.293701	-0.677433	-0.218001	0.327787	0.327787	0.180548	0.714885
RP24-92A2.1	RP24-92A2.1	na		0.854637	0.408837	0.978144	0.04988	-0.542253	-0.721223	-0.641171	-0.386853
Adam8	ADAM8	na		-0.344525	-0.504181	-0.340816	-0.573875	0.135986	0.712719	0.181706	0.732985
Arhgap27os3	ARHGAP27OS3	na		0.884543	0.351364	0.666551	0.0947876	-0.719719	-0.516186	-0.490175	-0.271164
RP23-293K21.4	RP23-293K21.4	na		0.72061	0.509106	0.229644	0.662603	-0.490894	-0.738822	-0.844357	-0.0478902
Naga	NAGA	na		0.62404	0.390389	0.0327768	0.751289	-0.37662	-0.637809	-0.507061	-0.277005
RP23-284A15.1	RP23-284A15.1	na		1.66919	1.40267	0.986883	0.209276	-1.53593	-1.53593	-0.598079	-0.598079
Zfp704	ZFP704	na		-0.521294	-0.538996	-0.174632	-1.28426	0.496193	0.564097	0.85152	0.607368
Vwf	VWF	na		0.749178	0.232645	0.277802	0.709889	-0.343626	-0.638197	-0.786328	-0.201365
Rnf150	RNF150	na		-1.08069	-0.888047	-0.108856	-1.69382	0.812393	1.15635	1.26554	0.537136
Ang	ANG	na		-0.207043	-0.817096	-0.256257	-0.578185	0.361241	0.662897	0.203175	0.631269
Pms1	PMS1	na		0.656369	0.408442	0.199272	0.558815	-0.189459	-0.875351	-0.399365	-0.358723
Cd40	CD40	na		-1.19213	-0.550584	-0.850715	-2.3202	1.0709	0.671808	2.00173	1.16918
Nat10	NAT10	na		-0.181227	-0.421178	-0.826415	-0.321623	0.380276	0.222129	0.692052	0.455985
Rad1	RAD1	na		0.208171	0.54604	0.930947	0.224144	-0.407166	-0.347044	-0.664211	-0.49088
Clec7a	CLEC7A	na		-0.507844	-0.7293	-0.035553	-1.10249	0.715754	0.521387	0.618009	0.52004
Gab1	GAB1	na		-1.25462	-0.78255	-0.153036	-0.963065	0.679928	1.35724	0.558051	0.558051
Tmem256	TMEM256	na		-0.600838	-0.204178	-0.213675	-0.351954	0.461704	0.343309	0.485571	0.0800567
Fabp4	FABP4	na		0.396679	0.672971	0.150814	1.06058	-0.59042	-0.479231	-0.830781	-0.380616
Emp1	EMP1	na		-2.41384	-0.911337	-0.225058	-2.15996	1.55579	1.76938	1.40363	0.981393
AC074336.1	AC074336.1	na		0.599329	0.379131	0.721497	0.023767	-0.461213	-0.517247	-0.256969	-0.488295
RP23-128P10.1	RP23-128P10.1	na		-0.143441	-1.14344	-1.53178	-0.695282	0.617949	0.668932	1.25332	0.973746
Fgl2	FGL2	na		-0.577079	-0.487927	-0.266294	-1.02237	0.271556	0.793451	0.914139	0.374522
Gsr	GSR	na		0.370361	0.343117	0.297321	0.753907	-0.282707	-0.430774	-0.809842	-0.241386
RP23-127O4.6	RP23-127O4.6	na		0.534661	0.257821	0.442779	0.210832	-0.635264	-0.157217	-0.460545	-0.193065
Bmx	BMX	na		0.426353	0.437201	0.709194	0.372309	-0.525463	-0.338093	-0.9336	-0.147902
Fam20c	FAM20C	na		-0.361295	-0.930882	-0.458976	-0.527021	1.01457	0.277607	0.682432	0.303566
Tmem194b	TMEM194B	na		0.482352	0.248133	0.377848	0.511301	-0.149085	-0.5814	-0.707234	-0.181914
RP23-262F9.15	RP23-262F9.15	na		1.03901	1.11918	0.422576	0.487281	-1.38984	-0.768348	-0.564249	-0.345609
Soga1	SOGA1	na		-0.265326	-0.605075	-0.711046	-1.24664	0.585531	0.284871	1.05664	0.901052
B3glct	B3GLCT	na		-0.386985	-0.271508	-0.548735	-0.610136	0.487484	0.17101	0.866302	0.292567
Wfdc17	WFDC17	na		-0.36608	-0.300421	-0.58455	-0.20444	0.496416	0.170084	0.604782	0.184207
Mirt1	MIRT1	na		0.904871	0.418956	0.606341	0.188351	-0.42256	-0.901264	-0.480964	-0.313728
Slfn4	SLFN4	na		-0.457984	-0.503173	-0.0555573	-0.857751	0.344824	0.616334	0.485658	0.427651
RP23-13C17.6	RP23-13C17.6	na		0.678306	0.286538	0.595984	0.0851307	-0.36455	-0.600295	-0.311449	-0.369664
Il6st	IL6ST	na		-0.343524	-0.36966	-0.439426	-0.722881	0.203828	0.509357	0.872589	0.28972
Rai14	RAI14	na		-0.465806	-1.45287	-0.378584	-1.04601	1.33969	0.578982	0.632063	0.792528
St6gal1	ST6GAL1	na		-0.591037	-0.970352	-0.0925465	-1.18238	0.96961	0.59178	0.521158	0.753766
Rgag4	RGAG4	na		-0.58805	-0.404604	-0.730965	-1.14947	0.34095	0.651704	1.31249	0.567946
RP23-302C16.2	RP23-302C16.2	na		0.900595	0.694143	0.842012	0.0384092	-0.836371	-0.758368	-0.385398	-0.495023
Atrnl1	ATRNL1	na		-1.10406	-0.386041	-0.375657	-1.56121	0.911532	0.578573	1.12611	0.810757
Prr5l	PRR5L	na		0.681689	0.468568	0.687998	0.192228	-0.260869	-0.889388	-0.563307	-0.316918
RP23-436E24.2	RP23-436E24.2	na		0.714605	0.786396	0.415086	0.484795	-0.770822	-0.730179	-0.885573	-0.0143065
Slc39a14	SLC39A14	na		-0.342995	-0.738924	-0.593258	-1.45999	0.642506	0.439413	0.928279	1.12497
Adrbk2	ADRBK2	na		0.817582	0.413466	0.420978	0.275087	-0.363441	-0.867608	-0.368339	-0.327728
Maml2	MAML2	na		0.715471	0.219238	0.311159	0.762301	-0.284529	-0.650178	-0.749383	-0.324077
Cmya5	CMYA5	na		0.600576	0.250079	0.591552	0.187685	-0.19589	-0.654763	-0.438443	-0.340795
Crebl2	CREBL2	na		0.462806	0.45222	0.0739765	0.79434	-0.602695	-0.312328	-0.463893	-0.404425
RP24-66E22.1	RP24-66E22.1	na		0.51564	0.678369	1.00807	0.324097	-0.55045	-0.643559	-1.08308	-0.249088
Notch1	NOTCH1	na		-0.406788	-0.898447	-0.910788	-0.100379	0.705816	0.599417	0.58894	0.422228
Ctps	CTPS	na		-0.558846	-0.558846	-0.585106	-0.78674	0.645512	0.47218	1.19511	0.176734
Tarm1	TARM1	na		-1.79064	-0.790636	-0.32209	-1.40955	1.42438	1.1569	0.497338	1.2343
Hist1h1b	HIST1H1B	na		-0.794401	-0.0574355	-0.690829	-0.738134	0.50328	0.348557	0.574143	0.85482
Cd82	CD82	na		0.70444	0.366761	0.17986	0.760117	-0.289661	-0.781538	-0.584223	-0.355753
RP24-338N17.1	RP24-338N17.1	na		-0.995907	-1.99591	-3.39771	-0.727856	1.50659	1.48522	1.98835	2.13721
Ltb	LTB	na		0.786521	0.552472	0.228993	0.579019	-0.839151	-0.499841	-0.670222	-0.137789
Acvrl1	ACVRL1	na		-1.3286	-0.433949	-0.320037	-0.955123	0.861507	0.901035	0.8953	0.379861
Siglec1	SIGLEC1	na		-3.52009	-0.247075	-3.47665	-3.47665	1.7023	2.06487	3.73457	3.21873
RP23-458A10.4	RP23-458A10.4	na		0.888394	0.258343	0.387902	0.380916	-0.504617	-0.642121	-0.550697	-0.218122
Sesn3	SESN3	na		0.525672	0.583238	0.586249	0.187105	-0.796256	-0.312654	-0.570119	-0.203238
RP23-293K21.7	RP23-293K21.7	na		1.02502	0.764064	0.308962	0.585701	-0.602063	-1.18703	-0.50636	-0.388304
Cyb561	CYB561	na		0.723231	0.775383	0.196613	0.598354	-0.516973	-0.981641	-0.527177	-0.267791
Cbr2	CBR2	na		-3.89678	-0.333848	-3.5302	-2.08275	2.45757	1.77307	3.03273	2.58022
RP24-502J3.1	RP24-502J3.1	na		0.976255	0.672327	0.338576	0.538735	-0.796859	-0.851722	-0.758808	-0.118503
Nol4l	NOL4L	na		-0.856113	-0.505206	-0.328184	-1.06515	0.942253	0.419066	1.01664	0.376688
Bend4	BEND4	na		-0.24481	-0.376554	-0.553617	-0.765121	0.481625	0.139742	0.664083	0.654655
Tmem140	TMEM140	na		0.16474	0.382233	0.668865	0.327431	-0.346345	-0.200628	-0.404508	-0.591787
Tagap	TAGAP	na		-0.429715	-0.341178	-0.533757	-0.177115	0.385446	0.385446	0.60568	0.105192
Mpp7	MPP7	na		0.369036	0.258853	0.828584	0.476282	-0.433024	-0.194865	-0.618876	-0.685989
Slc7a5	SLC7A5	na		-0.69062	-0.620231	-1.63705	-0.806979	0.768811	0.54204	1.55057	0.89346
Pdlim4	PDLIM4	na		-0.830796	-0.769395	-0.382207	-0.421735	1.07191	0.528286	0.26632	0.537622
Parvb	PARVB	na		-1.57064	-0.303851	-0.750464	-0.674516	1.08757	0.786915	0.705418	0.719562
S100a4	S100A4	na		-0.474983	-1.04005	-0.428221	-0.785631	0.413985	1.10105	0.877335	0.336516
Kif7	KIF7	na		-1.17977	-0.272876	-1.7411	-1.08902	0.774429	0.678214	1.49594	1.33419
Ahrr	AHRR	na		-0.720714	-0.58947	-0.509906	-0.435906	0.931362	0.378821	0.149057	0.796755
Setbp1	SETBP1	na		1.04637	0.638851	0.24299	0.785705	-0.7088	-0.976421	-0.794977	-0.233719
Osgin1	OSGIN1	na		0.240051	0.175199	0.42067	0.373364	-0.290464	-0.124786	-0.533526	-0.260508
Cep68	CEP68	na		-0.10399	-0.840956	-0.696417	-0.419577	0.395112	0.549834	0.679959	0.436034
Sult1a1	SULT1A1	na		-1.52933	-1.52933	-1.35125	-2.7987	2.14052	0.918131	3.08616	1.06379
Map3k6	MAP3K6	na		-0.865507	-0.576	-0.210387	-0.865252	0.907083	0.534424	0.808979	0.26666
Mfsd7a	MFSD7A	na		-0.125906	-1.1339	-0.586222	-0.974788	0.700678	0.559124	0.644732	0.916278
Clmn	CLMN	na		-0.417853	-0.811195	-0.129919	-0.691798	0.50642	0.722628	0.490794	0.330923
Pak1	PAK1	na		-0.263659	-0.50843	-0.57515	-0.466108	0.299702	0.472388	0.827914	0.213346
Rnf144b	RNF144B	na		-0.453596	-1.06177	-0.47332	-0.505925	0.504885	1.01048	0.664916	0.314328
Id1	ID1	na		0.895292	0.47208	0.369898	0.725379	-0.286912	-1.08046	-0.547639	-0.547639
Azin2	AZIN2	na		0.649217	0.428501	0.514072	0.378912	-0.291622	-0.786093	-0.174201	-0.718784
Mmp8	MMP8	na		-0.805771	-1.14281	-0.582729	-0.381095	1.03553	0.913047	0.224626	0.739199
Evi2a	EVI2A	na		-0.637557	-0.196343	-0.187149	-0.656157	0.306509	0.527391	0.410827	0.432481
Atl1	ATL1	na		0.975679	0.775381	1.04086	0.216429	-0.971853	-0.779208	-0.28107	-0.976215
Spata13	SPATA13	na		0.727901	0.325397	0.359508	0.628344	-0.3718	-0.681496	-0.79003	-0.197819
Slc25a27	SLC25A27	na		0.608496	0.678037	0.500571	0.420081	-0.25562	-1.03091	-0.340731	-0.579919
Rab3il1	RAB3IL1	na		-0.579245	-1.0862	-0.888849	-1.97631	1.1416	0.523849	1.59354	1.27162
Eng	ENG	na		-1.34923	-0.456143	-0.774199	-1.9857	0.76228	1.04309	1.56727	1.19263
Nme1	NME1	na		-0.5011	-0.781207	-0.67485	-0.20422	0.455832	0.826475	0.638811	0.240261
Gbp8	GBP8	na		0.248447	0.552601	0.276586	0.554321	-0.412066	-0.388983	-0.668071	-0.162836
Cd300lg	CD300LG	na		-0.984079	-0.199808	-0.337982	-0.925542	0.596424	0.587463	0.648985	0.614539
Crip2	CRIP2	na		-0.65877	-0.61695	-0.413671	-0.493398	0.253767	1.02195	0.360054	0.547016
Serpinb1a	SERPINB1A	na		-0.934237	-0.368133	-0.539781	-0.504157	0.298822	1.00355	0.530609	0.51333
Nrarp	NRARP	na		1.1635	0.969492	0.434807	0.673212	-0.865448	-1.26755	-0.864753	-0.243265
Chaf1a	CHAF1A	na		-0.400551	-0.362077	-0.760922	-0.301491	0.222886	0.539743	0.714811	0.347602
Antxr2	ANTXR2	na		-0.87364	-0.448619	-0.997264	-0.204059	0.458935	0.863325	0.526689	0.674635
Galnt9	GALNT9	na		-0.510001	-0.739868	-0.141146	-1.03423	0.7267	0.523167	0.681976	0.493399
Mrc1	MRC1	na		-1.56539	-0.92796	-1.65513	-2.87753	1.67408	0.819274	2.76633	1.76633
Serpinb8	SERPINB8	na		-1.21611	-1.21611	-0.233231	-1.2636	1.09374	1.33848	0.420211	1.07662
Trim36	TRIM36	na		-0.780258	-0.714169	-0.0799685	-1.02155	0.751123	0.743304	0.493021	0.608499
Vwa3b	VWA3B	na		1.1771	0.791214	0.979975	0.712494	-0.437605	-1.53071	-1.23504	-0.457431
Adap2	ADAP2	na		-0.644903	-0.214269	-0.355278	-0.774048	0.431448	0.427725	0.778153	0.351172
RP23-293K21.1	RP23-293K21.1	na		0.961495	0.503814	0.803005	0.19157	-0.827765	-0.637542	-0.650428	-0.344149
Cdk20	CDK20	na		-0.492904	-0.469058	-0.67063	-0.933664	0.554401	0.40756	1.15945	0.444848
RP23-480P21.3	RP23-480P21.3	na		-0.831766	-2.00169	-0.680149	-1.26511	1.88095	0.952505	1.14428	0.800979
Psd3	PSD3	na		-2.79999	-0.42148	-1.92539	-2.73275	1.90045	1.32102	1.93968	2.71846
Nr4a1	NR4A1	na		0.536572	0.470093	0.182237	0.540561	-0.324294	-0.68237	-0.524278	-0.19852
F5	F5	na		-1.32965	-1.30975	-0.495159	-0.806361	1.26861	1.37079	0.327494	0.974027
Cldn20	CLDN20	na		0.316499	0.797125	0.915909	0.54087	-0.861838	-0.251785	-0.904541	-0.552239
Plekha6	PLEKHA6	na		0.883767	0.408885	0.79394	0.311031	-0.391458	-0.901196	-0.710663	-0.39431
Rasgef1b	RASGEF1B	na		-0.43818	-0.663054	-0.234873	-0.523218	0.54687	0.554364	0.124208	0.633883
Cenpl	CENPL	na		0.699376	0.196876	0.423716	0.487846	-0.245129	-0.651122	-0.335276	-0.576284
Ednrb	EDNRB	na		-0.608185	-2.77811	-1.28847	-1.48111	1.80685	1.57944	1.66573	1.10385
Sh3bp4	SH3BP4	na		0.715977	0.188674	0.479003	0.400147	-0.597298	-0.307355	-0.59016	-0.28899
Zbtb32	ZBTB32	na		-0.12867	-1.06978	-0.737635	-0.684196	0.590148	0.608296	0.810569	0.61126
2510009E07Rik	2510009E07RIK	na		-0.498973	-0.290026	-0.637414	-0.799685	0.278634	0.510365	0.921741	0.515357
Mertk	MERTK	na		-3.05977	-1.6972	-3.77279	-0.657314	2.68746	2.06951	2.2643	2.16581
Bard1	BARD1	na		0.650501	0.763606	0.382143	0.826209	-0.957048	-0.457061	-0.945662	-0.262691
F13a1	F13A1	na		-2.24282	-2.18311	-0.4051	-2.31199	2.38387	2.04206	1.71923	0.997864
Pou6f1	POU6F1	na		0.637957	0.554164	0.177212	0.717023	-0.760592	-0.431528	-0.619573	-0.274662
Clec10a	CLEC10A	na		-2.47891	-0.976414	-0.734223	-2.69358	1.81877	1.63656	2.04338	1.38442
Pld3	PLD3	na		-0.433321	-0.404466	-0.842247	-0.226911	0.529779	0.30801	0.473528	0.59563
Cecr6	CECR6	na		0.875188	1.20583	0.213727	1.07036	-1.08174	-0.99928	-0.747798	-0.536294
RP23-137L8.2	RP23-137L8.2	na		0.511739	0.466792	0.262625	0.546634	-0.770899	-0.207632	-0.409423	-0.399837
Ptafr	PTAFR	na		-0.712262	-0.730998	-1.22876	-0.414681	0.970167	0.473094	1.10444	0.538996
Ceacam19	CEACAM19	na		-0.333142	-0.517982	-0.773501	-0.950379	0.47682	0.374304	0.754878	0.969003
Calml4	CALML4	na		-1.96759	-1.38263	-0.70931	-3.16874	1.73285	1.61737	2.18881	1.68924
Sash1	SASH1	na		-0.525732	-1.02419	-0.275328	-1.13616	0.844024	0.705894	0.518924	0.892568
Ccl6	CCL6	na		-0.82534	-0.607547	-0.491214	-0.236772	0.754802	0.678089	0.39076	0.337224
Scarf2	SCARF2	na		0.798373	0.857267	0.880974	0.69194	-0.371552	-1.28409	-1.14456	-0.428354
Aif1	AIF1	na		-1.4356	-0.628245	-0.402418	-1.39054	1.22465	0.839195	1.07532	0.717638
Treml4	TREML4	na		0.484256	0.575923	0.108539	0.67282	-0.485888	-0.574293	-0.484551	-0.296806
Myrf	MYRF	na		-1.56993	-0.941903	-1.96235	-0.377389	1.27442	1.23742	1.3952	0.94454
Glul	GLUL	na		-0.619388	-0.627601	-0.469656	-0.177785	0.64887	0.598122	0.393955	0.253487
RP23-402K12.2	RP23-402K12.2	na		0.793457	0.486028	0.595376	0.589708	-0.443583	-0.8359	-0.956033	-0.229052
Mrpl14	MRPL14	na		0.539531	0.492989	0.239288	0.30907	-0.630394	-0.402125	-0.188573	-0.359787
Gda	GDA	na		-0.791973	-0.517359	-0.533792	-0.208804	0.566894	0.742438	0.401169	0.341427
Art3	ART3	na		0.48608	0.614049	0.573117	0.891606	-0.631489	-0.468638	-1.10495	-0.359768
H2-DMa	H2-DMA	na		-1.05568	-0.3012	-0.613315	-1.06491	0.635411	0.721469	1.10502	0.573205
Tagln2	TAGLN2	na		-0.353998	-0.821419	-0.337239	-0.401993	0.554121	0.621299	0.472937	0.266291
RP23-218E6.3	RP23-218E6.3	na		0.746298	0.905288	0.624207	0.405197	-0.618274	-1.03331	-0.770652	-0.258753
Tmem63b	TMEM63B	na		0.675609	0.607567	0.439121	0.262555	-0.540304	-0.74287	-0.214799	-0.486878
Lgals1	LGALS1	na		-0.588179	-0.252374	-0.586779	-0.681455	0.446267	0.394285	0.879898	0.388337
Ksr1	KSR1	na		-2.04048	-1.37752	-2.03848	-0.507966	1.83399	1.58401	1.71046	0.835989
Snx9	SNX9	na		-0.824268	-0.276631	-0.358673	-0.415592	0.479979	0.620921	0.37382	0.400445
Tns3	TNS3	na		-0.433456	-0.473177	-0.140226	-0.719383	0.379812	0.526823	0.499529	0.360083
Hip1r	HIP1R	na		0.599814	0.462311	0.196892	0.8332	-0.423951	-0.638174	-0.63179	-0.3983
Frmd4b	FRMD4B	na		-0.234068	-0.840247	-0.792468	-0.546891	0.73399	0.340325	0.777544	0.561815
Lilr4b	LILR4B	na		-0.400397	-0.766525	-0.497355	-0.635658	0.516409	0.650515	0.228377	0.904636
Spic	SPIC	na		1.20261	0.612028	0.418755	0.941105	-1.11484	-0.6998	-0.911553	-0.448307
Slfn1	SLFN1	na		-0.574802	-0.252874	-0.379132	-0.451282	0.232553	0.595123	0.567097	0.263316
B3galnt2	B3GALNT2	na		0.345788	0.399193	0.484575	0.454591	-0.551054	-0.193928	-0.674547	-0.264616
Zfp395	ZFP395	na		-1.51219	-1.51219	-0.7035	-1.57797	2.23077	0.793615	1.12247	1.159
Sstr4	SSTR4	na		0.352329	0.431401	0.496784	0.432653	-0.182708	-0.601021	-0.657545	-0.271891
Epb41l1	EPB41L1	na		-0.662436	-0.478817	-0.875806	-0.18775	0.694202	0.447048	0.59287	0.470686
Fam189b	FAM189B	na		-0.497831	-0.60706	-0.763413	-0.5086	0.91156	0.193331	0.511865	0.760149
Ddhd2	DDHD2	na		-0.401199	-0.736383	-0.203444	-0.564631	0.667514	0.470068	0.429137	0.338939
Nt5dc2	NT5DC2	na		-1.69806	-1.0351	-0.924035	-2.03951	1.43122	1.30194	2.1957	0.767843
Dusp2	DUSP2	na		0.61717	0.644717	0.22925	0.639534	-0.548415	-0.713474	-0.647119	-0.221664
Cd33	CD33	na		-0.795027	-1.36439	-0.398512	-1.02144	1.25884	0.900579	0.866083	0.55387
Ikzf3	IKZF3	na		0.921917	1.13137	0.365305	0.821325	-0.992691	-1.0606	-0.809193	-0.377439
Creb5	CREB5	na		-0.521699	-1.793	-0.742035	-1.35209	1.23776	1.07694	0.86759	1.22653
Rnd3	RND3	na		-0.953291	-0.768482	-0.435806	-1.62396	0.851314	0.870459	1.14495	0.914815
Slc25a13	SLC25A13	na		-0.266367	-0.444365	-0.488176	-0.507285	0.155097	0.555635	0.382837	0.612624
Myof	MYOF	na		-0.727758	-0.705013	-0.157806	-0.904088	0.69412	0.738653	0.517893	0.544001
Tmcc3	TMCC3	na		-0.869032	-0.731528	-0.955891	-0.289447	0.946032	0.654531	0.860888	0.384449
Atf3	ATF3	na		-0.716574	-1.03454	-0.31693	-0.660542	0.86044	0.890676	0.439496	0.537977
Gcnt2	GCNT2	na		0.615187	0.720173	0.268049	0.804378	-0.822288	-0.513069	-0.748882	-0.323542
Noc2l	NOC2L	na		-0.568569	-0.712076	-0.227358	-0.844301	0.58798	0.692666	0.727036	0.344623
Lgals9	LGALS9	na		-1.26679	-0.587124	-0.59616	-1.31701	0.861398	0.992516	1.32685	0.586318
Cass4	CASS4	na		-1.19486	-0.369353	-0.460592	-1.05134	0.772827	0.791383	0.743548	0.76838
Mt1	MT1	na		-0.696496	-0.249037	-0.732739	-0.848216	0.516498	0.429035	0.912596	0.668359
Nrp1	NRP1	na		-0.849988	-0.650925	-0.191929	-0.934258	0.75077	0.750142	0.587185	0.539001
Nlrp1c-ps	NLRP1C-PS	na		-1.06429	-0.731717	-1.22592	-0.740491	1.12333	0.672674	0.505265	1.46114
RP23-167N13.2	RP23-167N13.2	na		-0.539772	-0.686613	-0.166717	-0.669217	0.675958	0.550426	0.389676	0.446259
Akap12	AKAP12	na		0.62002	0.467855	0.760204	0.179054	-0.441063	-0.646811	-0.468137	-0.471121
Axl	AXL	na		-0.578268	-0.753355	-1.31423	-0.984082	0.735393	0.59623	1.40198	0.896337
Mmp28	MMP28	na		-1.77044	-0.548046	-0.884955	-1.17446	0.892527	1.42596	1.08188	0.977541
RP23-36P21.8	RP23-36P21.8	na		0.890864	0.552695	1.37495	1.13168	-0.853297	-0.590263	-1.0236	-1.48303
Dusp16	DUSP16	na		0.504348	0.434068	0.398519	0.698013	-0.603992	-0.334425	-0.783796	-0.312738
Otud7b	OTUD7B	na		-0.462038	-1.14925	-0.491256	-0.661181	0.736291	0.874997	0.484496	0.667942
Dnah12	DNAH12	na		0.485943	0.281688	0.462461	0.7091	-0.289625	-0.478007	-0.716483	-0.455077
Itsn1	ITSN1	na		-0.447414	-0.684555	-0.329651	-0.412726	0.746295	0.385674	0.370388	0.37199
Prag1	PRAG1	na		-0.636945	-0.47648	-0.989913	-0.376936	0.445517	0.66791	0.829515	0.537334
Tiam1	TIAM1	na		-0.423668	-0.573595	-0.232785	-0.838708	0.554593	0.442671	0.576456	0.495035
Arsg	ARSG	na		-1.18831	-0.885744	-1.75638	-1.97878	0.811694	1.26236	2.05097	1.68419
Ccr2	CCR2	na		-1.95465	-1.54336	-0.669252	-2.7091	1.74878	1.74924	1.89936	1.479
Rab11fip5	RAB11FIP5	na		-0.453125	-0.62495	-0.19134	-0.474449	0.51359	0.564485	0.338367	0.327423
Ltc4s	LTC4S	na		-2.45416	-1.09159	-1.48813	-2.90317	2.2223	1.32345	2.56353	1.82777
Sox15	SOX15	na		0.722373	1.03923	0.459476	0.653979	-0.651086	-1.11052	-0.496581	-0.616875
Crip1	CRIP1	na		-0.886926	-0.406174	-0.466763	-0.830238	0.412714	0.880383	0.744506	0.552496
Tubb2a	TUBB2A	na		-0.708535	-0.689426	-0.191949	-0.783309	0.669977	0.727983	0.471688	0.503571
Cd14	CD14	na		-0.760622	-1.00763	-0.681719	-0.392921	0.966055	0.802202	0.371862	0.702779
Gnaq	GNAQ	na		-0.318743	-0.467444	-0.296906	-0.769975	0.391957	0.394228	0.549798	0.517083
Cd274	CD274	na		0.548838	0.482428	0.340305	0.502264	-0.39635	-0.634915	-0.647018	-0.195552
Adamtsl4	ADAMTSL4	na		-0.990302	-0.492803	-0.9879	-0.695719	1.07705	0.406051	1.01944	0.664177
Plekho1	PLEKHO1	na		-0.614724	-0.519283	-0.213692	-0.713628	0.568473	0.565535	0.617483	0.309832
Tmem176b	TMEM176B	na		-0.633861	-0.415426	-0.448634	-0.612555	0.507232	0.542054	0.817156	0.244031
Clec2d	CLEC2D	na		0.226599	0.433423	0.279485	0.430784	-0.476833	-0.183189	-0.292633	-0.417635
Gstm4	GSTM4	na		0.281341	0.632506	0.568364	0.7241	-0.59882	-0.315027	-0.776165	-0.516298
Noa1	NOA1	na		-0.826588	-0.352657	-0.446409	-0.460623	0.503332	0.675912	0.332377	0.574653
Cav2	CAV2	na		-2.6828	-1.22336	-1.4266	-3.2891	1.74347	2.16269	2.18811	2.52759
Abca6	ABCA6	na		-0.819144	-1.21146	-0.705045	-1.70504	1.09232	0.938286	1.53017	0.879918
Fam129b	FAM129B	na		-0.733392	-0.926038	-0.318935	-1.23682	0.907952	0.751474	0.773489	0.782268
Ly86	LY86	na		-0.619895	-0.495024	-0.34462	-0.611599	0.506788	0.608132	0.72741	0.228808
Ctsc	CTSC	na		-0.700803	-0.454865	-0.652625	-0.242428	0.497261	0.658406	0.354527	0.540527
Rhoc	RHOC	na		-1.2319	-0.503977	-1.33778	-1.21748	1.16042	0.575457	1.31857	1.23669
Runx2os1	RUNX2OS1	na		1.62328	1.57352	1.11915	1.16978	-1.93744	-1.25937	-1.6882	-0.600737
Slamf9	SLAMF9	na		-1.14465	-0.993133	-1.36243	-0.426303	1.31302	0.824768	0.880106	0.908628
Bst1	BST1	na		-1.48907	-0.968238	-0.971848	-0.616222	1.05014	1.40717	0.692649	0.895423
Kctd12	KCTD12	na		-0.4443	-0.367232	-0.392652	-0.153966	0.455777	0.355755	0.233176	0.313442
Lilra6	LILRA6	na		-0.567646	-0.483223	-0.233452	-0.78073	0.445875	0.604993	0.480975	0.533206
P2ry6	P2RY6	na		-0.727929	-0.448119	-0.692253	-0.313741	0.730121	0.445927	0.608749	0.397244
Irf2bp2	IRF2BP2	na		-0.691142	-0.514264	-0.266416	-0.520952	0.513217	0.692186	0.351315	0.436052
Rassf2	RASSF2	na		-0.601327	-0.677476	-0.309175	-0.432251	0.655617	0.623184	0.330447	0.410979
S100a10	S100A10	na		-1.32652	-0.839255	-0.464683	-1.09252	1.01502	1.15075	0.88556	0.671638
Ecm1	ECM1	na		-1.92048	-1.84572	-0.682384	-2.52643	1.97098	1.79522	1.54705	1.66177
RP23-293K21.2	RP23-293K21.2	na		0.907098	0.875037	1.08753	0.401763	-0.881878	-0.900257	-1.00067	-0.488613
Tmem119	TMEM119	na		-3.48599	-1.62349	-1.41478	-3.27727	2.48504	2.62444	2.19993	2.49211
Smc6	SMC6	na		0.424424	0.422249	0.519073	0.221846	-0.477692	-0.368979	-0.230375	-0.510546
Map4k5	MAP4K5	na		0.50709	0.453929	0.629867	0.352884	-0.596235	-0.364785	-0.6867	-0.29605
Hes1	HES1	na		0.433801	0.616664	0.61153	0.694423	-0.798373	-0.25209	-0.718175	-0.587778
Ahnak	AHNAK	na		-0.609552	-0.968352	-0.348701	-0.887589	0.905001	0.672899	0.585661	0.650632
Myc	MYC	na		-1.15609	-1.37849	-1.00799	-2.08599	0.943441	1.59114	1.84211	1.25187
Cyp39a1	CYP39A1	na		0.540686	0.553511	0.48865	0.689826	-0.651958	-0.44224	-0.854495	-0.32398
Agpat3	AGPAT3	na		0.427053	0.472575	0.346636	0.658109	-0.461205	-0.43842	-0.692966	-0.31178
Ms4a8a	MS4A8A	na		-1.48439	-2.04238	-0.736559	-1.6541	1.74189	1.78487	1.28868	1.10198
Tuba1a	TUBA1A	na		-0.798993	-0.564528	-1.04221	-0.407494	0.556488	0.807032	0.797326	0.652378
RP23-370F7.3	RP23-370F7.3	na		1.21429	0.929836	0.96985	0.512168	-0.998014	-1.14611	-0.546726	-0.935291
Rgl1	RGL1	na		-0.503437	-0.745713	-1.05945	-0.85899	0.486071	0.763078	1.0752	0.843248
Fcgr1	FCGR1	na		-0.632234	-0.688106	-0.350528	-0.648935	0.58401	0.736332	0.688867	0.310597
Dennd2a	DENND2A	na		-0.972015	-1.38705	-0.627172	-0.862192	1.15014	1.20892	0.726465	0.762898
Irf4	IRF4	na		-1.38664	-0.732727	-0.618002	-1.37156	1.08467	1.03469	1.15975	0.829811
Mreg	MREG	na		0.803622	0.458632	0.737121	0.437561	-0.50758	-0.754673	-0.748305	-0.426377
Epha4	EPHA4	na		0.748803	0.915375	0.911344	0.798044	-1.06936	-0.59482	-1.19256	-0.516829
Tnfrsf11a	TNFRSF11A	na		-0.294027	-0.53195	-0.700954	-0.552703	0.44232	0.383657	0.558433	0.695225
Cmtm3	CMTM3	na		-0.392679	-0.693849	-0.322283	-0.73354	0.472255	0.614274	0.601921	0.453903
Ly9	LY9	na		-0.903384	-0.768157	-0.89098	-0.435449	0.893209	0.778332	0.904079	0.422352
Ckb	CKB	na		-0.707105	-0.367986	-0.836445	-0.415104	0.55915	0.515938	0.705774	0.545774
Vcan	VCAN	na		-1.81372	-2.55068	-1.08901	-2.07961	2.1425	2.2219	1.19082	1.97779
Zcchc24	ZCCHC24	na		-0.717948	-0.416088	-0.702267	-0.511062	0.348723	0.785316	0.520125	0.693201
Cd80	CD80	na		-1.34778	-1.02586	-0.587663	-1.29221	1.05215	1.32149	0.707793	1.17207
L1cam	L1CAM	na		0.58182	0.460328	0.299691	0.567655	-0.62961	-0.412541	-0.569473	-0.297872
Ophn1	OPHN1	na		-1.38406	-2.25853	-0.980289	-1.61106	2.01034	1.63224	1.31739	1.27395
Tlr2	TLR2	na		-0.631624	-1.16055	-0.953408	-0.469892	0.919619	0.872557	0.717969	0.705332
Ank2	ANK2	na		-0.815251	-1.27992	-0.820346	-1.35678	1.44909	0.64608	0.980486	1.19664
Impdh1	IMPDH1	na		-0.579257	-0.486147	-0.424004	-0.798852	0.355155	0.71025	0.563718	0.659138
Mcub	MCUB	na		-0.857456	-0.377567	-0.482509	-0.733361	0.701478	0.533545	0.696582	0.519289
Ankrd33b	ANKRD33B	na		-1.19309	-1.51502	-0.647985	-1.49598	1.53664	1.17148	0.926252	1.21771
Ccm2	CCM2	na		0.501751	0.275923	0.345243	0.480026	-0.29308	-0.484592	-0.506744	-0.318522
Trim47	TRIM47	na		-1.62782	-0.823962	-0.741974	-1.35118	1.21405	1.23773	1.0141	1.07906
Fn1	FN1	na		-1.48927	-2.36398	-1.28872	-1.74012	2.38229	1.47095	1.34956	1.67928
Gpr146	GPR146	na		-0.630935	-0.524019	-0.884046	-0.79007	0.512322	0.642631	1.01543	0.658688
Msr1	MSR1	na		-1.51687	-1.09006	-0.876095	-0.837621	1.22482	1.38211	0.874453	0.839264
S1pr5	S1PR5	na		0.428681	0.650015	0.26798	0.613664	-0.534014	-0.544683	-0.459192	-0.422453
Cd244	CD244	na		0.624701	0.498829	0.378304	0.467877	-0.549447	-0.574084	-0.589131	-0.257051
Ski	SKI	na		-0.479287	-0.602047	-0.349298	-0.402289	0.430797	0.650537	0.374363	0.377224
Gnpda1	GNPDA1	na		-0.681061	-0.378075	-0.374257	-0.493309	0.435621	0.623513	0.371254	0.496312
Dhrs3	DHRS3	na		-1.07183	-0.68145	-0.626657	-0.800221	0.948409	0.804866	0.94002	0.486861
Lmna	LMNA	na		-2.13521	-1.24327	-1.0849	-1.52988	1.58906	1.78942	1.07205	1.54273
Steap3	STEAP3	na		-2.90423	-1.46366	-1.93059	-1.66755	2.51723	1.85066	1.78457	1.81357
Capn5	CAPN5	na		-2.13995	-1.13995	-1.30196	-1.50841	2.01386	1.26604	1.44936	1.36101
Aprt	APRT	na		-0.424089	-0.625837	-0.448445	-0.364381	0.619479	0.430446	0.496949	0.315877
Stab1	STAB1	na		-1.49385	-1.63825	-1.1687	-2.56102	1.66072	1.47138	1.89842	1.8313
Emp3	EMP3	na		-0.44178	-0.316132	-0.376265	-0.245687	0.424414	0.333499	0.401695	0.220261
Adgrg6	ADGRG6	na		-0.511501	-0.978069	-0.989881	-0.740521	0.562499	0.927072	0.789993	0.94041
Anxa3	ANXA3	na		-1.01121	-1.44245	-1.99205	-1.32909	1.16101	1.29265	1.46519	1.85595
Slc16a6	SLC16A6	na		-0.828135	-0.828135	-1.27637	-1.27637	0.783092	0.873178	1.25781	1.29492
C1qc	C1QC	na		-2.84744	-1.18448	-2.39232	-2.07039	2.06345	1.96847	2.02722	2.4355
Tmem86a	TMEM86A	na		-0.5673	-0.506758	-0.324758	-0.421434	0.532236	0.541821	0.286677	0.459514
Runx2	RUNX2	na		0.661322	0.41464	0.420123	0.383597	-0.476908	-0.599055	-0.446236	-0.357485
Mitf	MITF	na		-0.576547	-0.743752	-0.534802	-0.383936	0.654375	0.665926	0.439408	0.479328
Cyfip2	CYFIP2	na		0.570896	0.404813	0.345178	0.588046	-0.42348	-0.552229	-0.575696	-0.357527
Slc7a8	SLC7A8	na		-1.18414	-0.718704	-0.900284	-0.670207	0.845338	1.0575	0.6367	0.933789
C1qb	C1QB	na		-2.62567	-1.16269	-2.20645	-1.81413	2.08821	1.70016	2.00665	2.01393
Plxnd1	PLXND1	na		-0.469975	-0.468195	-0.522516	-0.684516	0.465368	0.4728	0.745942	0.461089
Igsf8	IGSF8	na		-0.663223	-0.522249	-0.395223	-0.581413	0.466879	0.718592	0.565428	0.411207
Itgb3	ITGB3	na		0.898569	0.658177	0.444649	0.725704	-0.740372	-0.816378	-0.615001	-0.555351
Lair1	LAIR1	na		0.318616	0.381503	0.391908	0.396816	-0.376794	-0.323327	-0.527108	-0.261616
Lsr	LSR	na		-0.715885	-1.06489	-0.537395	-0.990446	0.972582	0.808195	0.765997	0.761845
Gas7	GAS7	na		-2.81005	-2.83919	-1.49851	-3.2861	2.93196	2.71728	2.5286	2.25601
Il31ra	IL31RA	na		0.658148	0.561123	0.440968	0.502934	-0.621402	-0.597866	-0.61435	-0.329551
Tiam2	TIAM2	na		0.706409	0.452849	0.594375	0.42381	-0.558935	-0.600324	-0.627516	-0.390669
Cpne2	CPNE2	na		-0.590664	-0.565129	-0.644848	-0.837493	0.434871	0.720922	0.700926	0.781416
Ccl9	CCL9	na		-1.22827	-1.24672	-0.96874	-0.825909	1.31545	1.15954	1.02601	0.768644
Ace	ACE	na		0.693046	0.600606	0.424744	0.667149	-0.58882	-0.704831	-0.6715	-0.420393
Slc12a7	SLC12A7	na		-0.512557	-0.602194	-0.671697	-0.378304	0.675918	0.438833	0.509127	0.540876
Ptgs1	PTGS1	na		-2.17999	-1.76495	-2.08531	-1.17842	1.8644	2.08054	1.8572	1.40654
Espl1	ESPL1	na		-1.32107	-0.668991	-0.996063	-1.15057	0.951062	1.039	1.20606	0.940575
Bcl2	BCL2	na		0.578111	0.710971	0.424289	0.69311	-0.617269	-0.67181	-0.662304	-0.455096
Stom	STOM	na		-0.68685	-0.592181	-0.523025	-0.418427	0.685889	0.593141	0.471979	0.469475
Adam15	ADAM15	na		-0.62997	-0.522968	-0.416543	-0.487834	0.629035	0.523904	0.370053	0.534326
AC137511.1	AC137511.1	na		0.807023	0.862095	0.716588	0.660372	-0.957015	-0.712101	-0.843323	-0.533638
Plxna1	PLXNA1	na		-1.0741	-0.949771	-0.973391	-0.717735	1.19493	0.828938	0.75175	0.939377
Ptpn7	PTPN7	na		-0.438514	-0.588389	-0.561026	-0.369978	0.577819	0.449085	0.522677	0.408329
Abca9	ABCA9	na		-1.169	-0.946611	-0.725163	-0.997243	0.961392	1.15422	0.917489	0.804917
Slc44a1	SLC44A1	na		-0.84012	-0.557721	-0.787965	-0.596601	0.605062	0.792776	0.727119	0.657446
Trim30c	TRIM30C	na		-1.18958	-1.10712	-1.21012	-0.975657	1.19869	1.098	1.37484	0.810939
Syne1	SYNE1	na		0.813609	0.65182	0.881118	0.841591	-0.642057	-0.823371	-0.730166	-0.992544
Cmklr1	CMKLR1	na		-1.11994	-1.40945	-1.21244	-1.01604	1.48672	1.04268	1.17414	1.05435
Tbxas1	TBXAS1	na		-1.083	-1.43567	-1.49649	-1.53256	1.40305	1.11561	1.65351	1.37555
Frmd4a	FRMD4A	na		-0.474826	-0.407011	-0.487515	-0.437667	0.532868	0.348967	0.520913	0.404268
Inf2	INF2	na		-0.534975	-0.682531	-0.52272	-0.681548	0.504554	0.712953	0.637891	0.56638
Lpl	LPL	na		-2.25319	-1.80504	-1.55429	-1.81499	2.15183	1.9064	1.63936	1.72992
Sept08	SEPT08	na		-1.2039	-1.15432	-0.873881	-1.3559	1.08537	1.27285	1.07618	1.1536
Rab7b	RAB7B	na		-1.18954	-1.25858	-1.40922	-0.964435	1.27845	1.16966	1.04291	1.33075
Maf	MAF	na		-1.4727	-1.24393	-0.989098	-1.37856	1.36291	1.35371	1.2474	1.12026
Ccr5	CCR5	na		-2.74652	-2.24902	-2.88318	-2.12285	2.32273	2.67282	2.4358	2.57022
Col5a1	COL5A1	na		0.962506	0.671605	0.817591	0.718055	-0.83859	-0.795521	-0.731748	-0.803897
Dok2	DOK2	na		-1.45651	-1.69827	-1.20307	-1.54139	1.62268	1.53211	1.43785	1.30661
Cysltr1	CYSLTR1	na		-1.00112	-1.15115	-0.877081	-0.958382	1.02972	1.12255	0.809611	1.02585
Cttnbp2nl	CTTNBP2NL	na		-1.23243	-1.14997	-0.911879	-1.27961	1.14771	1.23469	0.965866	1.22563
C3ar1	C3AR1	na		-1.42477	-1.47141	-1.76276	-1.4244	1.42577	1.47041	1.46869	1.71847
Lyz1	LYZ1	na		-2.95884	-2.95884	-2.98248	-2.71944	3.38158	2.53611	2.80543	2.89649
S100a6	S100A6	na		-0.603324	-0.580621	-0.50919	-0.603928	0.616452	0.567492	0.580403	0.532714
Capg	CAPG	na		-1.28339	-1.31589	-1.23947	-1.29419	1.27878	1.3205	1.33832	1.19534
