# Supplementary material for: Notch and TLR signaling coordinate monocyte cell fate and inflammation
Source: eLife. 2020 Jul 29;9:e57007. doi: 10.7554/eLife.57007 (PMC7413669; doi:10.7554/eLife.57007)
Supplement: Supplementary file 1. — Lin: CD3, CD45R/B220, CD19, NK1.1, Ly6G, Ter119. [file elife-57007-supp1.doc]

| **Population** | **Phenotype** |
| --- | --- |
| Ly6Chi | CD45+Lin-CD117-CD11b+CX3CR1+Ly6ChiF4/80lo/-CD11c-MHC-IIlo/-CD43- |
| Ly6Clo | CD45+Lin-CD117-CD11b+CX3CR1+Ly6Clo/-F4/80lo/-CD11cloMHC-IIlo/-CD43+ |
| MHC-II+ cells (Ly6Clo) | CD45+Lin-CD117-CD11b+CX3CR1+Ly6Clo/-F4/80lo/-CD11c-MHC-II+CD43- |
| MF | CD45+Lin-CD117-CD11b+CX3CR1+Ly6Clo/-F4/80hiCD115+ |
| DC | CD45+Lin-CD117-CD11b+CX3CR1+Ly6Clo/-F4/80lo/-CD11c+MHC-II+CD43- |
| GC | CD45+Lin+CD11b+CX3CR1-Ly6CloF4/80-CD11c-MHC-II- |
