# Supplementary material for: Notch and TLR signaling coordinate monocyte cell fate and inflammation
Source: eLife. 2020 Jul 29;9:e57007. doi: 10.7554/eLife.57007 (PMC7413669; doi:10.7554/eLife.57007)
Supplement: Supplementary file 4. [file elife-57007-supp4.xlsx]

## Sheet: Tabelle1
AnalysisName	Name	Value	Name2	Description	Name3	Size	Class1	Class2	Index1	Index2	BYFDR	FDR	NES	Name4	PVAL	Blue	Green	Red	Blue5	Green6	Red7	Value8	Value9	Value10
MyAnalysis	-norm	mean_div														0	0	255	255	0	0	2.3	0.5	1,4,6,8,9,10,11,12,13,14,15,17,18,19,20,21,22,24,25
MyAnalysis	-rnd_seed	timestamp														0	0	255	255	0	0	2.3	0.5	1,4,6,8,9,10,11,12,13,14,15,17,18,19,20,21,22,24,25
MyAnalysis	-collapse	false														0	0	255	255	0	0	2.3	0.5	1,4,6,8,9,10,11,12,13,14,15,17,18,19,20,21,22,24,25
MyAnalysis	-permute	gene_set														0	0	255	255	0	0	2.3	0.5	1,4,6,8,9,10,11,12,13,14,15,17,18,19,20,21,22,24,25
MyAnalysis	-metric	Diff_of_classes														0	0	255	255	0	0	2.3	0.5	1,4,6,8,9,10,11,12,13,14,15,17,18,19,20,21,22,24,25
MyAnalysis	-gmx	20190730_mf_and_dc_core_genesUPPERCASE.gmt														0	0	255	255	0	0	2.3	0.5	1,4,6,8,9,10,11,12,13,14,15,17,18,19,20,21,22,24,25
MyAnalysis	-mode	Max_probe														0	0	255	255	0	0	2.3	0.5	1,4,6,8,9,10,11,12,13,14,15,17,18,19,20,21,22,24,25
MyAnalysis	-set_min	1														0	0	255	255	0	0	2.3	0.5	1,4,6,8,9,10,11,12,13,14,15,17,18,19,20,21,22,24,25
MyAnalysis	-set_max	50000														0	0	255	255	0	0	2.3	0.5	1,4,6,8,9,10,11,12,13,14,15,17,18,19,20,21,22,24,25
MyAnalysis	-chip	20190807_Seq1_2_pseudo_chip_UPPERCASE.chip														0	0	255	255	0	0	2.3	0.5	1,4,6,8,9,10,11,12,13,14,15,17,18,19,20,21,22,24,25
MyAnalysis	-order	descending														0	0	255	255	0	0	2.3	0.5	1,4,6,8,9,10,11,12,13,14,15,17,18,19,20,21,22,24,25
MyAnalysis	-scoring_scheme	weighted														0	0	255	255	0	0	2.3	0.5	1,4,6,8,9,10,11,12,13,14,15,17,18,19,20,21,22,24,25
MyAnalysis	-sort	real														0	0	255	255	0	0	2.3	0.5	1,4,6,8,9,10,11,12,13,14,15,17,18,19,20,21,22,24,25
MyAnalysis	-nperm	1000														0	0	255	255	0	0	2.3	0.5	1,4,6,8,9,10,11,12,13,14,15,17,18,19,20,21,22,24,25
MyAnalysis	-res	NewLoCutoff50VF0.117q0.05fold1.5forGSEA.gct														0	0	255	255	0	0	2.3	0.5	1,4,6,8,9,10,11,12,13,14,15,17,18,19,20,21,22,24,25
MyAnalysis	-cls	NewLoCutoff50VF0.117q0.05fold1.5 for GSEA2.cls														0	0	255	255	0	0	2.3	0.5	1,4,6,8,9,10,11,12,13,14,15,17,18,19,20,21,22,24,25
MyAnalysis	-median	false														0	0	255	255	0	0	2.3	0.5	1,4,6,8,9,10,11,12,13,14,15,17,18,19,20,21,22,24,25
MyAnalysis	-include_only_symbols	true														0	0	255	255	0	0	2.3	0.5	1,4,6,8,9,10,11,12,13,14,15,17,18,19,20,21,22,24,25
MyAnalysis	-rnd_type	no_balance														0	0	255	255	0	0	2.3	0.5	1,4,6,8,9,10,11,12,13,14,15,17,18,19,20,21,22,24,25
MyAnalysis			wt													0	0	255	255	0	0	2.3	0.5	1,4,6,8,9,10,11,12,13,14,15,17,18,19,20,21,22,24,25
MyAnalysis			ko													0	0	255	255	0	0	2.3	0.5	1,4,6,8,9,10,11,12,13,14,15,17,18,19,20,21,22,24,25
MyAnalysis				13	LYVEHIMHCIILOMF_13	748										0	0	255	255	0	0	2.3	0.5	1,4,6,8,9,10,11,12,13,14,15,17,18,19,20,21,22,24,25
MyAnalysis				22	CDC1_22	38										0	0	255	255	0	0	2.3	0.5	1,4,6,8,9,10,11,12,13,14,15,17,18,19,20,21,22,24,25
MyAnalysis				24	MODC_24	497										0	0	255	255	0	0	2.3	0.5	1,4,6,8,9,10,11,12,13,14,15,17,18,19,20,21,22,24,25
MyAnalysis				26	NCMONO_26	33										0	0	255	255	0	0	2.3	0.5	1,4,6,8,9,10,11,12,13,14,15,17,18,19,20,21,22,24,25
MyAnalysis				12	LYVELOMHCIIHIMF_12	707										0	0	255	255	0	0	2.3	0.5	1,4,6,8,9,10,11,12,13,14,15,17,18,19,20,21,22,24,25
MyAnalysis				25	CMONO_25	26										0	0	255	255	0	0	2.3	0.5	1,4,6,8,9,10,11,12,13,14,15,17,18,19,20,21,22,24,25
MyAnalysis				6	PERITANDSPLENIC_6	41										0	0	255	255	0	0	2.3	0.5	1,4,6,8,9,10,11,12,13,14,15,17,18,19,20,21,22,24,25
MyAnalysis				15	MF_15	132										0	0	255	255	0	0	2.3	0.5	1,4,6,8,9,10,11,12,13,14,15,17,18,19,20,21,22,24,25
MyAnalysis				16	CDC2SIGNATURE_16	1920										0	0	255	255	0	0	2.3	0.5	1,4,6,8,9,10,11,12,13,14,15,17,18,19,20,21,22,24,25
MyAnalysis				2	WOPERITMF_2	22										0	0	255	255	0	0	2.3	0.5	1,4,6,8,9,10,11,12,13,14,15,17,18,19,20,21,22,24,25
MyAnalysis				29	PDC_29	139										0	0	255	255	0	0	2.3	0.5	1,4,6,8,9,10,11,12,13,14,15,17,18,19,20,21,22,24,25
MyAnalysis				5	WOSPLREDPULPMF_5	16										0	0	255	255	0	0	2.3	0.5	1,4,6,8,9,10,11,12,13,14,15,17,18,19,20,21,22,24,25
MyAnalysis				17	CDC1SIGNATURE_17	2180										0	0	255	255	0	0	2.3	0.5	1,4,6,8,9,10,11,12,13,14,15,17,18,19,20,21,22,24,25
MyAnalysis				23	BCELL_23	169										0	0	255	255	0	0	2.3	0.5	1,4,6,8,9,10,11,12,13,14,15,17,18,19,20,21,22,24,25
MyAnalysis				4	WOMICROGLIA_4	34										0	0	255	255	0	0	2.3	0.5	1,4,6,8,9,10,11,12,13,14,15,17,18,19,20,21,22,24,25
MyAnalysis				28	MOMPVSCDC_28	98										0	0	255	255	0	0	2.3	0.5	1,4,6,8,9,10,11,12,13,14,15,17,18,19,20,21,22,24,25
MyAnalysis				3	WOLUNGMF_3	21										0	0	255	255	0	0	2.3	0.5	1,4,6,8,9,10,11,12,13,14,15,17,18,19,20,21,22,24,25
MyAnalysis				11	MICROGLIAANDSPLREDPULP_11	22										0	0	255	255	0	0	2.3	0.5	1,4,6,8,9,10,11,12,13,14,15,17,18,19,20,21,22,24,25
MyAnalysis				14	TOTALDC_14	43										0	0	255	255	0	0	2.3	0.5	1,4,6,8,9,10,11,12,13,14,15,17,18,19,20,21,22,24,25
MyAnalysis				27	MOMPMODCVSCDC_27	91										0	0	255	255	0	0	2.3	0.5	1,4,6,8,9,10,11,12,13,14,15,17,18,19,20,21,22,24,25
MyAnalysis				9	PERITANDMICROGLIA_9	29										0	0	255	255	0	0	2.3	0.5	1,4,6,8,9,10,11,12,13,14,15,17,18,19,20,21,22,24,25
MyAnalysis				8	LUNGANDSPLREDPULP_8	49										0	0	255	255	0	0	2.3	0.5	1,4,6,8,9,10,11,12,13,14,15,17,18,19,20,21,22,24,25
MyAnalysis				1	ALLMF_1	39										0	0	255	255	0	0	2.3	0.5	1,4,6,8,9,10,11,12,13,14,15,17,18,19,20,21,22,24,25
MyAnalysis				7	PERITANDLUNG_7	62										0	0	255	255	0	0	2.3	0.5	1,4,6,8,9,10,11,12,13,14,15,17,18,19,20,21,22,24,25
MyAnalysis				10	LUNGANDMICROGLIA_10	31										0	0	255	255	0	0	2.3	0.5	1,4,6,8,9,10,11,12,13,14,15,17,18,19,20,21,22,24,25
MyAnalysis				20	CDCVSMOMP_20	85										0	0	255	255	0	0	2.3	0.5	1,4,6,8,9,10,11,12,13,14,15,17,18,19,20,21,22,24,25
MyAnalysis							wt	ko	0	1	0.00551086	0	-2.26374	LYVEHIMHCIILOMF_13	5.49904e-05	0	0	255	255	0	0	2.3	0.5	1,4,6,8,9,10,11,12,13,14,15,17,18,19,20,21,22,24,25
MyAnalysis							wt	ko	0	1	1	0.509937	-1.02637	CDC1_22	0.451086	0	0	255	255	0	0	2.3	0.5	1,4,6,8,9,10,11,12,13,14,15,17,18,19,20,21,22,24,25
MyAnalysis							wt	ko	0	1	0.170837	0.0345263	-1.63729	MODC_24	0.0102282	0	0	255	255	0	0	2.3	0.5	1,4,6,8,9,10,11,12,13,14,15,17,18,19,20,21,22,24,25
MyAnalysis							wt	ko	0	1	0.0948689	0.038983	1.91329	NCMONO_26	0.00473327	0	0	255	255	0	0	2.3	0.5	1,4,6,8,9,10,11,12,13,14,15,17,18,19,20,21,22,24,25
MyAnalysis							wt	ko	0	1	1	0.219088	-1.32376	LYVELOMHCIIHIMF_12	0.11636	0	0	255	255	0	0	2.3	0.5	1,4,6,8,9,10,11,12,13,14,15,17,18,19,20,21,22,24,25
MyAnalysis							wt	ko	0	1	0.362142	0.0711168	-1.54319	CMONO_25	0.0252956	0	0	255	255	0	0	2.3	0.5	1,4,6,8,9,10,11,12,13,14,15,17,18,19,20,21,22,24,25
MyAnalysis							wt	ko	0	1	1	0.198364	-1.32256	PERITANDSPLENIC_6	0.117075	0	0	255	255	0	0	2.3	0.5	1,4,6,8,9,10,11,12,13,14,15,17,18,19,20,21,22,24,25
MyAnalysis							wt	ko	0	1	0.0110217	0.00151403	-1.9827	MF_15	0.000219962	0	0	255	255	0	0	2.3	0.5	1,4,6,8,9,10,11,12,13,14,15,17,18,19,20,21,22,24,25
MyAnalysis							wt	ko	0	1	1	0.49251	-1.01662	CDC2SIGNATURE_16	0.464504	0	0	255	255	0	0	2.3	0.5	1,4,6,8,9,10,11,12,13,14,15,17,18,19,20,21,22,24,25
MyAnalysis							wt	ko	0	1	1	1	0.802843	WOPERITMF_2	0.74274	0	0	255	255	0	0	2.3	0.5	1,4,6,8,9,10,11,12,13,14,15,17,18,19,20,21,22,24,25
MyAnalysis							wt	ko	0	1	1	0.953966	0.621522	PDC_29	0.953179	0	0	255	255	0	0	2.3	0.5	1,4,6,8,9,10,11,12,13,14,15,17,18,19,20,21,22,24,25
MyAnalysis							wt	ko	0	1	1	0.22322	-1.33888	WOSPLREDPULPMF_5	0.105307	0	0	255	255	0	0	2.3	0.5	1,4,6,8,9,10,11,12,13,14,15,17,18,19,20,21,22,24,25
MyAnalysis							wt	ko	0	1	1	0.675791	-0.860817	CDC1SIGNATURE_17	0.676382	0	0	255	255	0	0	2.3	0.5	1,4,6,8,9,10,11,12,13,14,15,17,18,19,20,21,22,24,25
MyAnalysis							wt	ko	0	1	1	0.934556	1.11931	BCELL_23	0.311373	0	0	255	255	0	0	2.3	0.5	1,4,6,8,9,10,11,12,13,14,15,17,18,19,20,21,22,24,25
MyAnalysis							wt	ko	0	1	1	0.37417	-1.17431	WOMICROGLIA_4	0.264889	0	0	255	255	0	0	2.3	0.5	1,4,6,8,9,10,11,12,13,14,15,17,18,19,20,21,22,24,25
MyAnalysis							wt	ko	0	1	1	0.719093	1.11049	MOMPVSCDC_28	0.319944	0	0	255	255	0	0	2.3	0.5	1,4,6,8,9,10,11,12,13,14,15,17,18,19,20,21,22,24,25
MyAnalysis							wt	ko	0	1	0.0316874	0.00519803	-1.81393	WOLUNGMF_3	0.00126478	0	0	255	255	0	0	2.3	0.5	1,4,6,8,9,10,11,12,13,14,15,17,18,19,20,21,22,24,25
MyAnalysis							wt	ko	0	1	1	0.972121	0.794867	MICROGLIAANDSPLREDPULP_11	0.754382	0	0	255	255	0	0	2.3	0.5	1,4,6,8,9,10,11,12,13,14,15,17,18,19,20,21,22,24,25
MyAnalysis							wt	ko	0	1	1	0.917108	0.753665	TOTALDC_14	0.812076	0	0	255	255	0	0	2.3	0.5	1,4,6,8,9,10,11,12,13,14,15,17,18,19,20,21,22,24,25
MyAnalysis							wt	ko	0	1	1	0.853382	0.993667	MOMPMODCVSCDC_27	0.471664	0	0	255	255	0	0	2.3	0.5	1,4,6,8,9,10,11,12,13,14,15,17,18,19,20,21,22,24,25
MyAnalysis							wt	ko	0	1	1	0.526606	-1.03994	PERITANDMICROGLIA_9	0.434699	0	0	255	255	0	0	2.3	0.5	1,4,6,8,9,10,11,12,13,14,15,17,18,19,20,21,22,24,25
MyAnalysis							wt	ko	0	1	1	0.215174	-1.36671	LUNGANDSPLREDPULP_8	0.0888095	0	0	255	255	0	0	2.3	0.5	1,4,6,8,9,10,11,12,13,14,15,17,18,19,20,21,22,24,25
MyAnalysis							wt	ko	0	1	1	0.197923	-1.31025	ALLMF_1	0.128568	0	0	255	255	0	0	2.3	0.5	1,4,6,8,9,10,11,12,13,14,15,17,18,19,20,21,22,24,25
MyAnalysis							wt	ko	0	1	0.0293912	0.00466888	-1.84783	PERITANDLUNG_7	0.000879846	0	0	255	255	0	0	2.3	0.5	1,4,6,8,9,10,11,12,13,14,15,17,18,19,20,21,22,24,25
MyAnalysis							wt	ko	0	1	1	0.44929	-1.10785	LUNGANDMICROGLIA_10	0.344955	0	0	255	255	0	0	2.3	0.5	1,4,6,8,9,10,11,12,13,14,15,17,18,19,20,21,22,24,25
MyAnalysis							wt	ko	0	1	1	0.983104	1.19998	CDCVSMOMP_20	0.21901	0	0	255	255	0	0	2.3	0.5	1,4,6,8,9,10,11,12,13,14,15,17,18,19,20,21,22,24,25
