# Supplementary material for: Notch and TLR signaling coordinate monocyte cell fate and inflammation
Source: eLife. 2020 Jul 29;9:e57007. doi: 10.7554/eLife.57007 (PMC7413669; doi:10.7554/eLife.57007)
Supplement: Supplementary file 5. [file elife-57007-supp5.xlsx]

## Sheet: LYVEHIMHCIILOMF_13
NAME	PROBE	DESCRIPTION<br>(from dataset)	GENE SYMBOL	GENE_TITLE	RANK IN GENE LIST	RANK METRIC SCORE	RUNNING ES	CORE ENRICHMENT
row_0	SIGLEC1	na	null	null	1	5.36023	0.0289393	Yes
row_1	GAS7	na	null	null	2	5.21693	0.060382	Yes
row_2	C1QA	na	null	null	6	4.80872	0.0792633	Yes
row_3	CD5L	na	null	null	8	4.55525	0.103351	Yes
row_4	C1QC	na	null	null	10	4.24732	0.125583	Yes
row_5	STEAP3	na	null	null	11	3.98302	0.149589	Yes
row_6	LTC4S	na	null	null	12	3.96852	0.173507	Yes
row_7	PSD3	na	null	null	13	3.93981	0.197252	Yes
row_8	C1QB	na	null	null	14	3.90447	0.220785	Yes
row_9	CCR1	na	null	null	18	3.63183	0.232573	Yes
row_10	CALML4	na	null	null	19	3.61414	0.254355	Yes
row_11	PTGS1	na	null	null	20	3.60434	0.276079	Yes
row_12	F13A1	na	null	null	22	3.57151	0.294238	Yes
row_13	MRC1	na	null	null	25	3.51301	0.308677	Yes
row_14	ECM1	na	null	null	26	3.48751	0.329696	Yes
row_15	CLEC10A	na	null	null	27	3.44156	0.350438	Yes
row_16	STAB1	na	null	null	30	3.43091	0.364383	Yes
row_17	OPHN1	na	null	null	31	3.11696	0.383169	Yes
row_18	EDNRB	na	null	null	32	3.07794	0.40172	Yes
row_19	C3AR1	na	null	null	34	3.04167	0.416685	Yes
row_20	MS4A8A	na	null	null	37	2.95871	0.427783	Yes
row_21	DOK2	na	null	null	38	2.94962	0.445561	Yes
row_22	ARSG	na	null	null	40	2.90461	0.4597	Yes
row_23	ANXA3	na	null	null	41	2.8874	0.477102	Yes
row_24	EMP1	na	null	null	42	2.8551	0.49431	Yes
row_25	TBXAS1	na	null	null	45	2.77386	0.504294	Yes
row_26	MAF	na	null	null	48	2.54214	0.512882	Yes
row_27	CD40	na	null	null	49	2.45681	0.527689	Yes
row_28	C4B	na	null	null	52	2.41477	0.535509	Yes
row_29	CMKLR1	na	null	null	56	2.37894	0.539746	Yes
row_30	ENG	na	null	null	59	2.28264	0.54677	Yes
row_31	MSR1	na	null	null	66	2.16032	0.539588	Yes
row_32	RHOC	na	null	null	68	2.14557	0.549152	Yes
row_33	SLC16A6	na	null	null	73	2.1045	0.548368	Yes
row_34	BST1	na	null	null	76	2.02269	0.553825	Yes
row_35	SERPINB8	na	null	null	81	1.96453	0.552197	Yes
row_36	ABCA9	na	null	null	85	1.91901	0.553662	Yes
row_37	LGALS9	na	null	null	88	1.88354	0.55828	Yes
row_38	TIMP2	na	null	null	97	1.75563	0.541926	Yes
row_39	SLC7A8	na	null	null	98	1.73667	0.552393	Yes
row_40	S1PR1	na	null	null	100	1.70769	0.559318	Yes
row_41	DHRS3	na	null	null	107	1.59008	0.548699	Yes
row_42	RGL1	na	null	null	108	1.5838	0.558245	Yes
row_43	RGS18	na	null	null	112	1.55664	0.557526	Yes
row_44	PTAFR	na	null	null	113	1.54335	0.566828	Yes
row_45	LY9	na	null	null	117	1.49899	0.565761	No
row_46	ST6GAL1	na	null	null	123	1.41816	0.557473	No
row_47	AHNAK	na	null	null	127	1.4071	0.555853	No
row_48	NRP1	na	null	null	138	1.31355	0.5301	No
row_49	CRIP1	na	null	null	141	1.29505	0.531171	No
row_50	CTSL	na	null	null	145	1.26241	0.528679	No
row_51	RNF144B	na	null	null	150	1.24731	0.522728	No
row_52	FRMD4B	na	null	null	157	1.20684	0.5098	No
row_53	ZCCHC24	na	null	null	165	1.17368	0.493305	No
row_54	IMPDH1	na	null	null	172	1.14413	0.479998	No
row_55	FAM20C	na	null	null	174	1.13909	0.483497	No
row_56	STOM	na	null	null	178	1.11024	0.480087	No
row_57	EPB41L1	na	null	null	179	1.1024	0.486731	No
row_58	CMTM3	na	null	null	188	1.07118	0.466251	No
row_59	LGALS1	na	null	null	190	1.05439	0.469239	No
row_60	ADAM15	na	null	null	200	1.02866	0.445136	No
row_61	GDA	na	null	null	201	1.02596	0.45132	No
row_62	CTSC	na	null	null	203	1.02536	0.454132	No
row_63	ADAP2	na	null	null	206	0.994249	0.453391	No
row_64	GNPDA1	na	null	null	209	0.96335	0.452463	No
row_65	GLUL	na	null	null	213	0.947216	0.448071	No
row_66	SLFN4	na	null	null	216	0.937233	0.446986	No
row_67	ITSN1	na	null	null	217	0.937173	0.452634	No
row_68	ANG	na	null	null	220	0.929291	0.451501	No
row_69	RAB11FIP5	na	null	null	235	0.871932	0.409618	No
row_70	IDH2	na	null	null	245	0.737205	0.383758	No
row_71	EMP3	na	null	null	248	0.689933	0.381182	No
row_72	CCM2	na	null	null	261	-0.80147	0.345609	No
row_73	JUP	na	null	null	272	-0.860724	0.317126	No
row_74	AGPAT3	na	null	null	288	-0.952186	0.27236	No
row_75	HES1	na	null	null	329	-1.17821	0.144781	No
